# Supplementary material for: Modulation properties of factors released by bone marrow stromal cells on activated microglia: an in vitro study
Source: PubMed Central journal article supplement (PMC5378994; doi:10.1038/srep07514), 2014-12-19
Supplement: srep07514-s1.pdf [file srep07514-s1.pdf]

# Modulation properties of factors released by bone marrow stromal cells on activated microglia: an *in vitro* study

Dasa Cizkova<sup>1,2\*</sup>, Stéphanie Devaux<sup>1\*</sup>, Françoise Le Marrec-Croq<sup>1</sup>, Julien Franck<sup>1</sup>, Lucia Slovinska<sup>2</sup>, Juraj Blasko<sup>2</sup>, Jan Rosocha<sup>3</sup>, Timea Spakova<sup>3</sup>, Christophe Lefebvre<sup>1</sup>, Isabelle Fournier<sup>1</sup>, Michel Salzet<sup>1</sup>

## Supplementary data 1

sp|P50229|CCL3\_RAT (100 %), 10 335,1 Da

C-C motif chemokine 3 OS=Rattus norvegicus GN=Ccl3 PE=1 SV=1

3 exclusive unique peptides, 3 exclusive unique spectra, 3 total spectra, 32/92 amino acids (35 % coverage)

MKVSTAALAV LLCTMALWNE VFSAPYGADT PTACCFSYGR QIPRKFIADY FETSSLCSQP  
GVIFLTKRNR QICADPK ETW VQEYITELEL NA

sp|P30348|CXCL2\_RAT (100 %), 10 782,5 Da

C-X-C motif chemokine 2 OS=Rattus norvegicus GN=Cxcl2 PE=1 SV=1

2 exclusive unique peptides, 2 exclusive unique spectra, 2 total spectra, 49/100 amino acids (49 % coverage)

MAPPTRQLLN AVLVLALLLLA TNHOGTGVVV ASELRCQCLT TLPRVDFKNI QSLTVP PGP  
HCAQTEVIAT LKDGHEVCLN PEAPLVQRIV QKILNKGKAN

sp|P31722|C1QC\_RAT (100 %), 25 685,9 Da

Complement C1q subcomponent subunit C OS=Rattus norvegicus GN=C1qc PE=1 SV=2

3 exclusive unique peptides, 3 exclusive unique spectra, 6 total spectra, 40/245 amino acids (16 % coverage)

MVVGTSCQPQ HGLYLLLLLL ALPLRSQANA GCGIPGMPG LPGTPEGKDGH DGLQGGKGE  
GIPALPGTQG PKGQKGEPEGM PGHRGKNGPM GTSGSPGDPG PRGPPGEPGE EGRYKQKHQS  
VFTVTRQTAQ YPAANGLVKF NSAITNPQGD YNTNTGKFTC KVPGLYFVH HTSQTANLCV  
QLLLNNAKVT SFCDHMSNSK QVSSGGVLLR LQRGDEVWLA VNDYNGMVGTEGSDSVFSGF  
L LFPD

sp|P18418|CALR\_RAT (100 %), 47 997,0 Da

Calreticulin OS=Rattus norvegicus GN=Calr PE=1 SV=1

5 exclusive unique peptides, 5 exclusive unique spectra, 6 total spectra, 90/416 amino acids (22 % coverage)

MLLSVPLLLG LLGLAAADPA IYFKEQFLDG DAWTNRWVES KHKSDFGKFFV LSSGK FYGDQ  
EKDKGLQTSQ DARFYALSAR FEPFSNKGQT LVVQFTVKHE QNIDCGGGYV KLFPGGLDQK  
DMHGDSEYN MFGPDICGPG TKKVHVFVNY KGNVLIINKD IRCKDDEFTH LYTLIVRPDN  
TYEVKIDNSQ VESGSLEDDW DFLPPKK IKD PDAAKPEDWD ERAKIDDPD SKPEDWDKPE  
HIPDPDAK KP EDWDEEMDGE WEPPIQNPPE YKGEWKPRQI DNPDKGTWI HPEIDNPEYS  
PDANIYAYDS FAVLGLDLWQ VKSGTIFDNF LITNDEAYAE EFGNETWGTV KAAEKQMKDK  
QDEEQRLKEE EEDKKRKEE EAEDEDEDEE RDEDEDEEDE KEEDEEDATG QAKDEL

sp|P30904|MIF\_RAT (100 %), 12 477,4 Da

Macrophage migration inhibitory factor OS=Rattus norvegicus GN=Mif PE=1 SV=4

3 exclusive unique peptides, 4 exclusive unique spectra, 4 total spectra, 41/115 amino acids (36 % coverage)

MPMFIVNTNV PRASVPEGFL SELTQQLAQA TGKPAQYIAY HVVDPQLMTF SGTSDPCALC  
SLHSIGKIGG AQNRNYSKLL CGLLSDR LHI SPDRVYINYY DMNAAANVGWN GSTFA

sp|Q62611-2|ILRL1\_RAT (100 %), 38 090,4 Da

Isoform B of Interleukin-1 receptor-like 1 OS=Rattus norvegicus GN=Il1r1

6 exclusive unique peptides, 7 exclusive unique spectra, 8 total spectra, 82/336 amino acids (24 % coverage)

MIGKWRMGLW ALAILTVPMY FIVTEGRKTS WGLENEALIV RCPQRGGAIN PVEWYYSNTN  
ER IPTQKRNR IFVSRDR LKF LPAKVEDSGI YTCVIRSPES IKITGSLNVTI YKRPPNCKIP  
DYMMYSTVDG SDKNSKITCP TIALYNWTAP VQWFKNCKAL QGPRFR AHMS YLFIDKVVSHV  
DEGDYTCR FT HTENGTNYIV TATRSFTVEE KGFSTFPVIT NPPHNYTVEV EIGKTANIAC  
SACFGTASQF VAVLWQINKT RIGSFGKARI QEEKGPNKSS SNGMICLTS LRLITGVTDKD  
FSLKYDCVAM NHHGVIRHPV RLRRKQPSKE CLSQIA

sp|O88201|CLC11\_RAT (100 %), 36 387,5 Da

C-type lectin domain family 11 member A OS=Rattus norvegicus GN=Clec11a PE=2 SV=1

6 exclusive unique peptides, 6 exclusive unique spectra, 6 total spectra, 67/328 amino acids (20 % coverage)

MQAAWLLGAL LVPHLLSFGH GARGHGKWE GYVGGALEEE RDRESLMLKN LQEALGLPTG  
VGNKDNLAEN SEGKEVWEAT ETQGEVEEET TTTTPSSSPT PFPSPSPTSE DTVTYILGRL  
ASLDAGLHQL HIRLHVLDTR VVELTQGLR LRDAASDTRD SVQALKVEVQ RSEQEHRLE  
GCLKGLRLGH KCFLLSRDFE TQAAAQARCK ARGGSLAQPA DRQQMDALSR YLRAALAPYN  
WPVWLGVDNR RSEGLYLFEN GQRVSFAWH RALSPESGAQ PSAASHPLSP DQPNGGILEN  
CVAQASDDGS WWDHDCERRL YFVCEFPF

sp|P11762|LEG1\_RAT (100 %), 14 857,2 Da

Galectin-1 OS=Rattus norvegicus GN=Lgals1 PE=1 SV=2

9 exclusive unique peptides, 10 exclusive unique spectra, 18 total spectra, 86/135 amino acids (64 % coverage)

MCGLVASNL NLKPGECKLV RGELAPDAKS FVLNLGKDSN NLCLHFNPRF NAHGDAANTIV  
CNSKDDGTWG TEQRETAFFP QPGSITEVCI TFDQADLTIK LPDGHEFKFP NRLNMEAINY  
MAADGDFK IK CVAFE

sp|P08699|LEG3\_RAT (100 %), 27 202,1 Da

Galectin-3 OS=Rattus norvegicus GN=Lgals3 PE=1 SV=4

3 exclusive unique peptides, 4 exclusive unique spectra, 5 total spectra, 23/262 amino acids (9 % coverage)

|            |            |             |            |            |            |
|------------|------------|-------------|------------|------------|------------|
| MADGFSLNDA | LAGSGNPNPQ | GWPGAWGNQP  | GAGGYPGASY | PGAYPGQAPP | GYPGQAPPS  |
| AYPGPTGSA  | YPGPTAPGAY | PGPTAPGAFP  | GQPPGGPAYP | SAPGAYPSAP | GAYPATGPFQ |
| APTGPLTVPY | DMPLPGGVMP | RMLITIIIGTV | KPNANSITLN | FKKNDIAFH  | FNPRFNENNR |
| RVIVCNTKQD | NNWGREERQS | AFPESGKPF   | KIQVLVEADH | FKVAVNDVHL | LQYNHRMKNL |
| REISQLGIIG | DITLTSASHA | MI          |            |            |            |

sp|P07824|ARG1\_RAT (100 %), 34 973,7 Da

Arginase-1 OS=Rattus norvegicus GN=Arg1 PE=1 SV=2

3 exclusive unique peptides, 3 exclusive unique spectra, 3 total spectra, 30/323 amino acids (9 % coverage)

|            |            |             |             |            |            |
|------------|------------|-------------|-------------|------------|------------|
| MSSKPKPIEI | IGAPFSKQGP | RGGVEKGPAA  | LRKAGLVEKL  | KETEYNVRDH | GDLAFVDVNP |
| DSPFQIVKNP | RSVGKANEQL | AAVVAETQKN  | GTISVVLGGD  | HSMAGSISG  | HARVHPDLCV |
| IWVDAHTDIN | TPLTSSGNL  | HGQPVAFLLK  | ELKKGKFPDVP | GFSWVTPCIS | AKDIVYIGLR |
| DVDPGEHYII | KTLGIKYFSM | TEVDKLGIGK  | VMEETFSYLL  | GRKKRPIHLS | FDVDGLDPVF |
| TPATGTPVVG | GLSYREGLYI | TEEIIYKTGLL | SGLDIMEVNP  | TLGKTPEEVT | RTVNTAVALT |
| LSCFGTKREG | NHKPETDYLK | PPK         |             |            |            |

sp|P40241|CD9\_RAT (100 %), 25 215,7 Da

CD9 antigen OS=Rattus norvegicus GN=Cd9 PE=1 SV=2

2 exclusive unique peptides, 3 exclusive unique spectra, 4 total spectra, 35/226 amino acids (15 % coverage)

|             |            |            |            |            |            |
|-------------|------------|------------|------------|------------|------------|
| MPVKGGSKCI  | KYLLFGFNI  | FWLAGIAVLA | IGLWLRFDSD | TKSIFEQETN | HSSFYTGVI  |
| LIGAGALMML  | VGFLGCGAV  | QESQCMLGFL | FGFLLVIFA  | EIAAAVWGYT | HKDEVIKELQ |
| EYKQDITYKML | RNKDEPQRET | LKAIHMALNC | CGIAGGVEQF | ISDICPKKQV | LESFOVKS   |
| DAIDDEVFHSK | FHIIGAVGIG | IHAVMIFGMI | FSMILCCAIR | RSREMV     | SCPS       |

sp|Q63691|CD14\_RAT (100 %), 40 055,2 Da

Monocyte differentiation antigen CD14 OS=Rattus norvegicus GN=Cd14 PE=2 SV=2

4 exclusive unique peptides, 5 exclusive unique spectra, 7 total spectra, 65/372 amino acids (17 % coverage)

|             |            |            |            |            |            |            |
|-------------|------------|------------|------------|------------|------------|------------|
| MKLMGLLLL   | PLTLVHA    | SPA        | TPEPCELDQD | EESVRCYCNF | SDPQPWSSA  | FLCAGAEDVE |
| FYGGGRSLEY  | LLKRVDTAN  | LGQYTDIIRS | LPLKRLTVRS | ARVPTQILFG | TLR        | VVLGYSGL   |
| RELTLENLEV  | TGTALSPLLD | ATGPDNLTL  | LRNVSWATTD | TWLAELQQL  | KPGLKVLISA |            |
| QAHSNLNFSCK | QVGVFPALAT | LDLSDNPELG | EKGLSALCP  | HKFPTLQVLA | LRNAGMETTS |            |
| GVCSSALAAAR | VPLQALDLSH | NLSLRTAGTP | SCDWPSQLNS | LNLSFTGLEH | VPKGLPAKLS |            |
| VLDLSYNRLD  | RKPRPEELPE | VGSLSLTGNP | FLHSESQSEA | YNSGVVIATA | LSPGSAGLSG |            |
| TLALLLGHRL  | FV         |            |            |            |            |            |

sp|P27274|CD59\_RAT (100 %), 13 790,5 Da

CD59 glycoprotein OS=Rattus norvegicus GN=Cd59 PE=1 SV=2

4 exclusive unique peptides, 4 exclusive unique spectra, 9 total spectra, 38/126 amino acids (30 % coverage)

|            |            |            |            |            |            |
|------------|------------|------------|------------|------------|------------|
| MRARRGFILL | LLLAVLCSTG | VSLRCYNCLD | PVSSCKTNST | CSPNLDAACL | AVSGKQVYQQ |
| CWRFSDCNAK | FILSRLEIAN | VQYRCQADL  | CNKSFEDKPN | NGAISLLGKT | ALLVTSVLA  |
| ILKPCF     |            |            |            |            |            |

sp|Q9R1E9|CTGF\_RAT (100 %), 37 755,2 Da

Connective tissue growth factor OS=Rattus norvegicus GN=Ctgf PE=2 SV=1

19 exclusive unique peptides, 20 exclusive unique spectra, 45 total spectra, 194/347 amino acids (56 % coverage)

|             |            |           |            |             |             |            |
|-------------|------------|-----------|------------|-------------|-------------|------------|
| MLASVAGPVS  | LALVLLLC   | TRPATG    | CDCSAQ     | CQCAAEAAAPR | CPAGVSLVLD  | GCGCCRVCAK |
| QLGELCTERD  | PCDPHK     | GLFC      | DFGSPANRKI | GVCTAKDGAP  | CVFGGSVYRS  | GESFOSSCKY |
| QCTCLDGA    | VGC        | VPLCSMDVR | LPSDFCFPR  | RVKLPGKCCE  | EWVCEDEPKDR | TVVGPALAA  |
| RELEDTFGPDP | TMMR       | ANCLVQ    | TTEWSACSKT | CGMGI       | STRVNT      | NDNTFCRLEK |
| EADLEENIKK  | GKKCIRTPKI | AKPVK     | FELSG      | CTSVK       | TYRAK       | FCGVCTDGR  |
| VEFKCPDGEI  | MKKNMFIKT  | CACHY     | CPGD       | NDIFESLYR   | KMYGDMA     | CTPHRTTTL  |

sp|P17246|TGFB1\_RAT (100 %), 44 330,0 Da

Transforming growth factor beta-1 OS=Rattus norvegicus GN=Tgfb1 PE=1 SV=1

4 exclusive unique peptides, 4 exclusive unique spectra, 4 total spectra, 64/390 amino acids (16 % coverage)

|            |            |            |            |            |             |                |
|------------|------------|------------|------------|------------|-------------|----------------|
| MPPSGLRLLP | LLLPLP     | PWLLV      | LTPGRPAAGL | STCKTIDMEL | VKRKRIEAIR  | GQILSKLRLA     |
| SPSSQGEVPP | GPLPEAVLAL | YNSTRDR    | VAG        | ESADPEPEPE | ADYYAK      | EVTRVLMVDRNNAI |
| YDKTKDITHS | IYMFNTSDI  | REAVPEPPLL | SRAELRLQRF | KSTVEQHV   | VEL         | YQKYSNNSWR     |
| YLGNR      | LLTPT      | DTPEWLSFDV | TGVVROQLNO | GDGIQGRFS  | AHCSCDSKDN  | VLHVEINGIS     |
| PKRRGDLGTI | HDMNRP     | PFLLL      | MATPLERAQH | LHSSRRHRAL | DTNYCFSSTE  | KNCCVQRLYI     |
| DFRKDLGWKW | IHEPKGYHAN | FCLGPCPYIW | SLDTQYSKVL | ALYNQHNPGA | SASPCCVPPQA |                |
| LEPLPIVYYV | GRKPKVEQLS | NMIVRSCKCS |            |            |             |                |

sp|Q63434|PLGF\_RAT (100 %), 17 681,3 Da

Placenta growth factor OS=Rattus norvegicus GN=Pgf PE=1 SV=1

2 exclusive unique peptides, 2 exclusive unique spectra, 2 total spectra, 34/158 amino acids (22 % coverage)

|            |          |      |            |            |            |            |            |
|------------|----------|------|------------|------------|------------|------------|------------|
| MLAMKLF    | FTCF     | LQVL | LAGLAVH    | SQGALSAGNN | STEMEVVFPN | EVWGRSYCRP | MEKLVYIADE |
| HPNEVSHIFS | PSCVLLSR | CS   | GCCGDEGLHC | VALKTANITM | QILKIPPNRD | PHSYVEMTFS |            |
| QDVLCECRPI | LETTKA   | ERRK | TKGKRKQSK  | T          | PQTEEPHL   |            |            |

sp|Q5RJP7|PGFRL\_RAT (100 %), 41 932,9 Da

Platelet-derived growth factor receptor-like protein OS=Rattus norvegicus GN=Pdgfr1 PE=2 SV=1

4 exclusive unique peptides, 4 exclusive unique spectra, 4 total spectra, 73/375 amino acids (19 % coverage)

|             |            |            |             |            |             |
|-------------|------------|------------|-------------|------------|-------------|
| MKVWLLLLGLL | LLHEALGDVA | GQHPPKPKRP | KEQGENRIKIP | TNKKAKPKIP | KIKDRDRTADS |
| APKSSQSIMMQ | AMDNGRFQKP | AATVSLMAGQ | SVELRCKGSK  | VEWSYPAYLD | TFKDSRLTVK  |
| QNERYGQLTL  | VNSTTADTGE | FSCWERLCNG | YICRRDEART  | GSTYIFFTEK | GELFVPSPSY  |
| FADVYLNLPDR | QAVVPCRVTA | PSAKVTLHRE | FPAKEIPANG  | TDIVYDMKRG | FVYVLPKSDH  |
| GGVVYCKAEA  | GKKSQISVKY | QLLYVEVPSG | PPSTTILASS  | NKVRGGDDIS | VLCTVLGEPD  |
| VEVEFRWIFP  | GQKDERPVTI | QDTRWLIHRG | LGHTRTRISQS | VITVEDFETI | DAGYYICTAQ  |
| NLRGQTTVAT  | TVEFS      |            |             |            |             |

tr|F1M9B2|F1M9B2\_RAT (100 %), 28 948,7 Da

Insulin-like growth factor binding protein 7, isoform CRA\_b OS=Rattus norvegicus GN=Igfbp7 PE=4 SV=2

13 exclusive unique peptides, 17 exclusive unique spectra, 41 total spectra, 152/281 amino acids (54 % coverage)

|            |            |             |             |             |            |
|------------|------------|-------------|-------------|-------------|------------|
| MERSPRALLL | GAAGLLLLLL | PLSSSSSSDA  | CGPCVPASCP  | ALPPLGCPLG  | ETRDAAGCCP |
| VCARGEPEPC | GGGAAGRGC  | APGMECVKSR  | KRRKKGKAGAA | AGGPATLAVC  | VCKSRYPVCG |
| SDGVTYPSGC | QLRAASLRAE | SRGEKAITQV  | SKGTCEQGPS  | IVTTPPKDIWN | ITGAKVYLSL |
| EVIGIPTPVL | IWNKVKRDHS | GVQRTTELLPG | DRENLAIQTR  | GGPEKHEVTG  | WVLVSPLSKE |
| DTGEYECHAS | NSQQQASASA | KITVVDIHE   | IPVKKGEGAQL |             |            |

tr|F1M798|F1M798\_RAT (100 %), 111 649,0 Da

Bone morphogenetic protein 1, isoform CRA\_b OS=Rattus norvegicus GN=Bmp1 PE=3 SV=2

2 exclusive unique peptides, 2 exclusive unique spectra, 2 total spectra, 37/990 amino acids (4 % coverage)

|             |            |            |            |            |             |
|-------------|------------|------------|------------|------------|-------------|
| MPGVARPPLP  | LLSLPLLLLL | LLPRAGRPLD | LADYTYDLGE | EDAPELLNYK | DPCKAAAFLLG |
| DIALDEEDLR  | AFRVQQAAYL | RQQTAQRSSI | KAAGNSSALG | RQSTSGQPQR | GSRGRWRSRP  |
| RSRRAATSRP  | ERVWPDGVIP | FVIGGNFTGS | QRAVFRQAMR | HWEKHTCVTF | LERTDEDSYI  |
| VFTYRRCGCC  | SYVGRGGGGP | QAISIGKNC  | KFGIVVHELG | HVIGFWHEHT | RPDRDRHVS   |
| VRENIQPGQE  | YNFLKMEVQE | VESLGETYDF | DSIMHYARNT | FSRGIFLDTI | VPKYEVNGVK  |
| PSIQQRTRLS  | KGDIQAARKL | YKCPACGETL | QDSTGNFSSP | EYPNGYSAHM | HCVWRI SVTP |
| GEKIIILNFTS | MDLYRSRLCW | YDYVEVRDGF | WRKAPLRGRF | CGGKLEPIV  | STVSRVWVWF  |
| RSSSWVWVKG  | FFAVYEACIG | GDKVKDNGHI | QSPNYPDDYR | PSKVCIWRIQ | VSEGFVGLT   |
| FQSFIEIHRD  | SCAYDLEVR  | DGHSESSNLI | GRYCGYEKPD | DIKSTSSRLW | LKFSVSDGSIN |
| KAGFAVNFVK  | EVDECSRPNR | GGCEQRCLNT | LGSYKCCSDP | GYELAPDKRR | CEAACGGFLT  |
| KLNGSITSPG  | WPKEYPPNKN | CIWQLVAPTQ | YRISLQFDF  | ETEGNDVCKY | DFVEVRSGLT  |
| ADSKLHGKFC  | GSEKPEVITS | QYNNMRVEFK | SDNTVSKKGF | KAHFFSKDE  | CSKDNNGCQQ  |
| DCVNTFGSVE  | QCQRSGFVHL | DNKHDCKEAG | CEHKVSTSG  | TITSPNWPDK | YPSKKECTWA  |
| ISSTPGHRVK  | LTFVEMDIES | QPECAYDHLE | VFDGRDAKAP | VLGRFCGSKK | PEPVLATGNR  |
| MFLRFYSDNS  | VQRKGFQASH | STECGGQVRA | DVKTKDLYSH | AQFGDNNYPG | GVDCWEVIVA  |
| EEGYGVELVF  | QTFEVEEETD | CGYDYMELFD | GYDSTAPRLG | RYCGSGPPEE | VYSAGDSVLV  |
| KFHSDDTISK  | KGFHLRYTST | KFQDTLHSRK |            |            |             |

tr|D3ZVB7|D3ZVB7\_RAT (100 %), 34 071,5 Da

Osteoglycin (Predicted) OS=Rattus norvegicus GN=LOC100910855 PE=4 SV=1

3 exclusive unique peptides, 3 exclusive unique spectra, 4 total spectra, 39/298 amino acids (13 % coverage)

|            |            |            |            |            |            |
|------------|------------|------------|------------|------------|------------|
| MKTVHPTLLL | LLFVPLTQQT | POTQLDSHVN | SKYGTDNSEE | TKFIQDYEDK | YLDGKNIKEK |
| ETMIIPDEKS | LQLQKDEVIP | SVPTKKENDE | MPTCLLCVCL | SGSVYCEEVD | IDAVPPLPKE |
| SAYLYARFNK | IKKLTAKDFA | DMPNLRRLDF | TGNLIEDIED | GTFSKLSLLE | ELTLAENQLL |
| RLPVLPPKLT | LLNAKYNKIK | SKGIKANTFK | KLNKLSFLYL | DHNDLESVPP | NLPESLRVIH |
| LQFNSSISIT | DDTFCKANDT | RYIRERMEEI | RLEGNPIALG | KHPNSFICLK | RLPTGSYF   |

sp|Q5XII0|EPDR1\_RAT (100 %), 25 639,5 Da

Mammalian ependymin-related protein 1 OS=Rattus norvegicus GN=Epdr1 PE=2 SV=1

4 exclusive unique peptides, 4 exclusive unique spectra, 5 total spectra, 42/224 amino acids (19 % coverage)

|            |            |            |             |            |            |
|------------|------------|------------|-------------|------------|------------|
| MLTRAPRRLV | QGPRETWLLG | GLWVWILCGL | GMAGSPGTPQ  | PCQAPQWEG  | RQVLYQQSSG |
| HNSRALVSYD | GLNQRVRVLD | ERKALIPCKR | LFEYILLYKD  | GVMFQIEQAT | KLCAKIPLAE |
| PWDPLDIPQN | STFEDQYSIG | GPQEQIMVQE | WSDRRRTARSY | ETWIGVYTAK | DCYPVQETFI |
| RNYTVVLSTR | FFDVQLGIKD | PSVFTPPSTC | QTAQPEKMK   | NCSL       |            |

sp|Q5FVH0|C1QT5\_RAT (100 %), 25 334,7 Da

Complement C1q tumor necrosis factor-related protein 5 OS=Rattus norvegicus GN=C1qtnf5 PE=2 SV=1

3 exclusive unique peptides, 3 exclusive unique spectra, 3 total spectra, 48/243 amino acids (20 % coverage)

|            |            |                         |             |            |            |
|------------|------------|-------------------------|-------------|------------|------------|
| MRPLLALLLL | GLASGSPPLD | DNKIPSLCPG              | QPGLPGTTPGH | HGSQGLPGRD | GRDGRDGAPG |
| APGEKGEGR  | PGLPGP     | VLLNEQGHYDATTGK (100 %) | GPVG        | AIGPAGECSV | PPRSAFSAKR |
| TPLPFDRVLL | NEQGHYDATI | GKFTCQVPGV              | YFAVHATVY   | RASLQFDLVK | NGQSIASFFQ |
| FFGGWPKPAS | LSGGAMVRL  | PEDQVWVQVG              | VGDYIGIYAS  | IKTDSTFSGF | LVYSDWHSSP |
| VFA        |            |                         |             |            |            |

sp|Q62718|NTRI\_RAT (100 %), 37 997,6 Da

Neurotrimin OS=Rattus norvegicus GN=Ntm PE=1 SV=1

3 exclusive unique peptides, 3 exclusive unique spectra, 5 total spectra, 55/344 amino acids (16 % coverage)

|             |            |            |            |            |            |
|-------------|------------|------------|------------|------------|------------|
| MGVCGYLFLLP | WKCLLVVSLR | LLFLVPTGVP | VRSGDATFPK | AMDNVTVRQG | ESATLRCTID |
| NRVTRVAWLN  | RSTILYAGND | KWCLDPRVVL | LSNTQTQYSI | EIQNVVDYDE | GPYTCVQTD  |
| NHPKTRVHLL  | IYQVSPKIVE | ISSDISINEG | NNISLTCIAT | GRPEPTVTRW | HISPKAVGFV |
| SEDEYLEIQG  | ITREQSGEYE | CSASNDVAAP | VVRR       | VNVTVN     | YPPYISEAKG |
| LQCEASAVPS  | AEFQWFKDDK | RLVEGKKGVK | VENRPFLSRL | TFNNVSEHDY | GNYTCVASNK |
| LGHNTASIML  | FGGAVSDEVN | NGTSRRAGCI | WLLPLLVLLH | LLKF       |            |

sp|P07936|NEUM\_RAT (100 %), 23 603,2 Da

Neuromodulin OS=Rattus norvegicus GN=Gap43 PE=1 SV=1

9 exclusive unique peptides, 10 exclusive unique spectra, 17 total spectra, 143/226 amino acids (63 % coverage)

|                     |                     |                     |                     |                     |                     |
|---------------------|---------------------|---------------------|---------------------|---------------------|---------------------|
| M L C C M R R T K Q | V E K N D E D Q K I | E Q D G V K P E D K | A H K A A T K I Q A | S F R G H I T R K K | L K D E K K G D A P |
| A A E A E A K E K D | D A P V A D G V E K | K E G D G S A T T D | A A P A T S P K A E | E P S K A G D A P S | E E K K G E G D A A |
| P S E E K A G S A E | T E S A A K A T T D | N S P S S K A E D G | P A K E E P K Q A D | V P A A V T D A A A | T T P A A E D A A K |
| A A Q P P T E T A E | S S Q A E E E K E A | V D E A K P K E S A | R Q D E G K E D P E | A D Q E H A         |                     |

tr|Q3MID6|Q3MID6\_RAT (100 %), 37 148,8 Da

Calumenin OS=Rattus norvegicus GN=Calu PE=2 SV=1

8 exclusive unique peptides, 11 exclusive unique spectra, 22 total spectra, 114/315 amino acids (36 % coverage)

|                     |                     |                     |                     |                     |                     |
|---------------------|---------------------|---------------------|---------------------|---------------------|---------------------|
| M D L R Q F L M C L | S L C T A F A L S K | P T E K K D R V H H | E P Q L S D K V H N | D A Q N F D Y D H D | A F L G A E E A K S |
| F D Q L T P E E S K | E R L G M I V D K I | D T D K D G F V T K | G E L K S W I K H A | Q K K Y I Y D N V E | N Q W Q E F D M N Q |
| D G L I S W D E Y R | N V T Y G T Y L D D | P D P D D G F N Y K | Q M M V R D E R R F | K M A D K D G D L I | A T K E E F T A F L |
| H P E E Y D Y M K D | I V V Q E T M E D I | D K N A D G F I D L | E E Y I G D M Y S H | D G N A D E P E W V | K T E R E Q F V E F |
| R D K N R D G K M D | K E E T K D W I L P | S D Y D H A E A E A | R H L V Y E S D Q D | K D G K L T K E E I | V D K Y D L F V G S |
| Q A T D F G E A L V | R H D E F           |                     |                     |                     |                     |

sp|P97546-3|NPTN\_RAT (100 %), 30 836,4 Da

Isoform 3 of Neuroplastin OS=Rattus norvegicus GN=Nptn

2 exclusive unique peptides, 2 exclusive unique spectra, 2 total spectra, 28/277 amino acids (10 % coverage)

|                     |                       |                     |                     |                     |                     |
|---------------------|-----------------------|---------------------|---------------------|---------------------|---------------------|
| M S G S S L P G A L | A L S L L L L V S G S | L L P G P G A A Q N | E P R I V T S E E V | I I R D S L L P V T | L Q C N L T S S S H |
| T L M Y S Y W T K N | G V E L T A T R K N   | A S N M E Y R I N K | P R A E D S G E Y H | C V Y H F V S A P K | A N A T I E V K A A |
| P D I T G H K R S E | N K N E G Q D A M     | Y C K S V G Y P H P | E W M W R K K E N G | V F E E I S N S S G | R F F I I N K E N Y |
| T E L N I V N L Q I | T E D P G E Y E C N   | A T N S I G S A S V | S T V L R V R S H L | A P L W P F L G I L | A E I I I L V V I I |
| V V Y E K R K R P D | E V P D A G P M K T   | N S T N N H K D K N | L R Q R N T N       |                     |                     |

sp|O35276|NRP2\_RAT (100 %), 103 899,5 Da

Neuropilin-2 OS=Rattus norvegicus GN=Nrp2 PE=2 SV=1

2 exclusive unique peptides, 2 exclusive unique spectra, 2 total spectra, 34/925 amino acids (4 % coverage)

|                     |                     |                     |                     |                     |                     |
|---------------------|---------------------|---------------------|---------------------|---------------------|---------------------|
| M D M F P L T W I F | L A L Y F S G H K V | R S Q Q D P P C G G | R L N S K D A G Y I | T S P G Y P Q D Y P | S H Q N C E W V V Y |
| A P E P N Q K I V L | N F N P H F E I E K | H D C K Y D F I E I | R D G D S E S A D L | L G K H C G N I A P | P T I I S S G S V L |
| Y I K F T S D Y A R | Q G A G F S L R Y E | I F K T G S E D C S | K N F T S P N G T I | E S P G F P E K Y P | H N L D C T F T I L |
| A K P R M E I I L Q | F L T F D L E H D P | L Q V G E G D C K Y | D W L D I W D G I P | H V G P L I G K Y C | G T K T P S K L R S |
| S T G I L S L T F H | T D M A V A K D G F | S A R Y Y L V H Q E | P P E N F Q C N A P | L G M E S G R I A N | E Q I S A S S T F S |
| D G R W T P Q Q S R | L H G D D N G W T P | N V D S N K E Y L Q | V D L R F L T M L T | A I A T Q G A I S R | E T Q K G Y Y V K S |
| Y K L E V S T N G E | D W M V Y R H G K N | H K V F Q A N N D A | T E L V L N K L H T | P L L T R F I R I R | P Q T W H L G I A L |
| R L E L F G C R V T | D A P C S N M L G M | L S G L I A D T Q I | S A S S T R E Y L W | S P S A A R L V S S | R S G W F P R N P Q |
| A Q P G E E W L Q V | D L G T P K T V K G | V I I Q G A R G G D | S I T A M E A R A F | V R K F K V S Y S L | G C D W E Y I Q D   |
| P R T Q Q P K L F E | G N M H Y D T P D I | R R F E P V P A Q Y | V R V Y P E R W S P | A G I G M R L E V L | G C D W T D S K P T |
| V E T L G P T V K S | E E T T P Y P M D   | E D A T E C G E N C | S F E D D K D L Q L | P S G F N C N F D P | P E E T C G W M Y D |
| R A K W L Q S T W I | S S A N P N D R T F | P D D K N F L K L Q | S D G G R E G Q F G | R L I S P P V H L P | R S P V C M E F Q Y |
| Q A M G G H G V A L | Q V V R E A R Q E S | K L L W V I R E D Q | G S E W K H G R I I | L P S Y D M E Y Q I | V F E G V I G K G R |
| S G E I S I D D I R | I S T D V P L E N C | M E P I S A F A V D | I P E I H G G E G Y | E D E I D D D Y E G | D W N N S S T S G   |
| A G S P S S G K E K | S W L Y T L D P I L | I T I I A M S S L G | V L L G A T C A G L | L L Y C T C S Y S G | L S S R S C T T L E |
| N Y N F E L Y D G L | K H K V K I N H Q K | C C S E A           |                     |                     |                     |

sp|Q9ZQ05|NOV\_RAT (100 %), 38 508,5 Da

Protein NOV homolog OS=Rattus norvegicus GN=Nov PE=1 SV=1

9 exclusive unique peptides, 9 exclusive unique spectra, 20 total spectra, 104/351 amino acids (30 % coverage)

|                       |                     |                     |                     |                     |                     |
|-----------------------|---------------------|---------------------|---------------------|---------------------|---------------------|
| M S V F L R K Q C L   | C L G F L L L H L L | N Q V S A T L R C P | S R C P S Q C P S I | S P T C A P G V R S | V L D G C S C C P V |
| C A R Q R G E S C S   | E M R P C D Q S S G | L Y C D R S A D P N | N E T G I C M V P E | G D N C V F D G V I | Y R N G E K F E P N |
| C Q Y H C T C R D G   | Q I G C V P R C Q L | D V L L L P G D C P | A P K K V A V P G E | C C E K W T C G S E | E K G T L G L A L   |
| P A Y R P E A T I N G | V E L S A D S I N C | I E Q T T E W S A C | S K S C G M G L S T | R V T N R N L Q C E | M V K Q T R L C M V |
| R P C E Q E P G E A   | T D M K G K K C L R | T K K S L K S I H L | Q F K N C T S L Y T | Y K P R F C G I C S | D G R C C T P F N T |
| K T I Q V E F Q C L   | P G Q I I K K P V M | V I G T C T C H S N | C P Q N N E A F L Q | E L E L K T S R G E | M                   |

sp|P30120|TIMP1\_RAT (100 %), 23 794,2 Da

Metalloproteinase inhibitor 1 OS=Rattus norvegicus GN=Timp1 PE=1 SV=2

11 exclusive unique peptides, 22 exclusive unique spectra, 49 total spectra, 155/217 amino acids (71 % coverage)

|                     |                     |                     |                     |                     |                     |                     |                     |
|---------------------|---------------------|---------------------|---------------------|---------------------|---------------------|---------------------|---------------------|
| M A P F A S L A S G | I L L L L S L I A S | S K A C S C A P T H | P Q T A F C N S D L | V I R A K F M G S P | E I I E T T L Y Q R | Y E I K M T K M L K | G F D A V G N A T G |
| F R F A Y T P A M E | S L C Q Y V H K S Q | N R S E E F L I A G | R L R N G N L H I T | A C S F L V P W H N | L S P A Q Q K A F V | K T Y S A G C G V C | T V F P C S A I P C |
| K L E S D S H C L W | T D Q I L M G S E K | G Y Q S D H F A C L | P R N P D L C T W Q | Y L G V S M T R S L | P L A K A E A       |                     |                     |

sp|P30121|TIMP2\_RAT (100 %), 24 357,0 Da

Metalloproteinase inhibitor 2 OS=Rattus norvegicus GN=Timp2 PE=1 SV=3

11 exclusive unique peptides, 15 exclusive unique spectra, 33 total spectra, 119/220 amino acids (54 % coverage)

|                     |                     |                     |                     |                     |                     |                     |                     |
|---------------------|---------------------|---------------------|---------------------|---------------------|---------------------|---------------------|---------------------|
| M G A A A R S L R L | A L G L L L L A T L | L R P A D A C S C S | P V Y P Q Q A F C N | A D V V I R A K A V | S E K E V D S G N D | I Y G N P I K R I Q | Y E I K Q I K M F K |
| G P D K D I E F I Y | T A P S S A V C G V | S L D V G G K K E Y | L I A G K A E G D G | K M H I T L C D F I | V P W D T L S I T Q | K K S L N H R Y Q M | G C E C K I T R C P |
| M I P C Y I S S P D | E C L W M D W V T E | K S I N G H Q A K F | F A C I K R S D G S | C A W Y R G A A P P | K Q E F L D I E D P |                     |                     |

tr|D3ZVB7|D3ZVB7\_RAT (100 %), 34 071,5 Da

Osteoglycin (Predicted) OS=Rattus norvegicus GN=LOC100910855 PE=4 SV=1

3 exclusive unique peptides, 3 exclusive unique spectra, 4 total spectra, 39/298 amino acids (13 % coverage)

|                     |                     |                     |                     |                       |                     |
|---------------------|---------------------|---------------------|---------------------|-----------------------|---------------------|
| M K T V H P T L L L | L L F V P L T Q Q T | P Q T Q L D S H V N | S K Y G T D N S E E | T K F I Q D Y E D K   | Y L D G K N I K E K |
| E T M I I P D E K S | L Q L Q K D E V I P | S V P T K K E N D E | M P T C L L C V C L | S G S V Y C E E E V D | I D A V P P L P K E |
| S A Y L Y A R F N K | I K K L T A K D F A | D M P N L R R L D F | T G N L I E D I E D | G T F S K L S L L E   | E L T L A E N Q L L |
| R L P V L P P K L T | L L N A K Y N K I K | S K G I K A N T F K | K L N K L S F L Y L | D H N D L E S V P P   | N L P E S L R V I H |
| L Q F N S I S S I T | D D T F C K A N D T | R Y I R E R M E E I | R L E G N P I A L G | K H P N S F I C L K   | R L P T G S Y F     |

tr|D3ZAF5|D3ZAF5\_RAT (100 %), 90 059,4 Da

Periostin, osteoblast specific factor (Predicted), isoform CRA\_a OS=Rattus norvegicus GN=Postn PE=4 SV=1

39 exclusive unique peptides, 56 exclusive unique spectra, 240 total spectra, 534/810 amino acids (66 % coverage)

|                     |                    |                                                   |                                        |                    |                    |
|---------------------|--------------------|---------------------------------------------------|----------------------------------------|--------------------|--------------------|
| MVPLLLPSAL          | LLLLFLCDVDP        | ANANSYYDKV                                        | LAHSRIRGRD                             | QGNVVCALQQ         | ILGTTKKKYFS        |
| SCKN <b>WYQGA I</b> | <b>CGKKTTVLYE</b>  | <b>CCPGYMRMEG</b>                                 | MK <b>GCPAVMPI</b>                     | DHVVYGT L GIV      | <b>GATTTQHYS D</b> |
| <b>VSKLREEIEG</b>   | <b>KGSYTYFAPS</b>  | <b>NEAWDNLDSD</b>                                 | <b>IRRGLENNVN</b>                      | <b>VELLNALHSH</b>  | <b>MVNKRMLTKD</b>  |
| <b>LKHGMVIPSM</b>   | <b>YNNLGLFINH</b>  | <b>YPNGVVTVNC</b>                                 | <b>ARVIHGNQIA</b>                      | <b>TNGVVHVDR</b>   | <b>VL TQIGTSIQ</b> |
| <b>DFIEAEDELS</b>   | <b>SFRAAAITSD</b>  | <b>LLESLGRDGH</b>                                 | <b>FTLFAPTNEA</b>                      | <b>FEKLRGVLE</b>   | <b>RIMGDKVASE</b>  |
| <b>ALMKYHILNLT</b>  | <b>LQCSEAITGG</b>  | <b>AVFETMEGNT</b>                                 | <b>IEIGCEGDSI</b>                      | <b>SINGIKMVNK</b>  | <b>KDIVTKNGVI</b>  |
| <b>HLIDEVLIPD</b>   | <b>SAKQVIELAG</b>  | <b>KQOTTFTDLV</b>                                 | <b>AQLGLASSLK</b>                      | <b>PDGEYTL LAP</b> | <b>VNNAFSDDTL</b>  |
| <b>SM DQRLLKLI</b>  | <b>LQNHILKVKV</b>  | <b>GLSDL</b>                                      | <b>NALQNIILYHLTPGVYIGK (100 %)</b> x18 | <b>FVYRTAICI</b>   | <b>ENSCMVRGSK</b>  |
| <b>QGRNGAIHIF</b>   | <b>REIIQPAEKS</b>  | <b>LHEKLEILIGDRNALQNIILYHLTPGVYIGK (100 %)</b> x4 | <b>DLKDLLTQP</b>                       | <b>GDWTLFAPTN</b>  | <b>QGSKIYVKG V</b> |
| <b>DAFKGMTNEE</b>   | <b>REILIGDKNA</b>  | <b>LQNIILYHLT</b>                                 | <b>PGVYIGK GFE</b>                     | <b>PGVTN LKTT</b>  | <b>KYIQIKFVRG</b>  |
| <b>NETLLVNLK</b>    | <b>SKESDI MTTN</b> | <b>GVIVVVDKLL</b>                                 | <b>YPADIPV GND</b>                     | <b>QLLELLN KLI</b> | <b>PDFRLIKEGE</b>  |
| <b>STFKEIPMTV</b>   | <b>YTTKIIITKLV</b> | <b>EPKIKVIQGS</b>                                 | <b>LQPIIKTEGP</b>                      | <b>AMTKIHIEGE</b>  | <b>GGETEETLQK</b>  |
| <b>TVTEVIHGEP</b>   | <b>VIKKYTKI ID</b> | <b>GVPVEITEKE</b>                                 | <b>TREERIITGP</b>                      | <b>EIKYTRISTG</b>  |                    |
| <b>FLQKDTPAKK</b>   | <b>IQANKRVQGS</b>  | <b>RRRSREGRSQ</b>                                 |                                        |                    |                    |

sp|P08721|OSTP\_RAT (100 %), 34 962,7 Da

Osteopontin OS=Rattus norvegicus GN=Spp1 PE=1 SV=2

4 exclusive unique peptides, 4 exclusive unique spectra, 5 total spectra, 58/317 amino acids (18 % coverage)

|                    |                |                    |                    |                   |                    |
|--------------------|----------------|--------------------|--------------------|-------------------|--------------------|
| MRLAVVCFCL         | FGLASCLPVK     | VAEFGSSSEK         | AHYSK <b>HSDAV</b> | <b>ATWLKPDPSQ</b> | <b>KQNL LAPQNS</b> |
| VSSEETDDFK         | QETLPSNSNE     | SHDHMDDDDD         | DDDDGDHAES         | EDSVNSDESD        | ESHHSDESDE         |
| SFTASTQADV         | LTPAIPTVDV     | PDGR <b>GDSLAY</b> | <b>GLRSKSR SFP</b> | <b>VSDEQYDAT</b>  | <b>DEDLTSRMKS</b>  |
| QESDEAIKVI         | PVAQR LSVPS    | QDQSNK TSH         | ESSQDDEPSV         | ETHSLEQSK E       | YKQRASHEST         |
| EQSDAIDSAE         | KPDAIDSAER     | SDAIDSQASS         | KASLEHQ SHE        | FHSHEDKLV L       | DPKSKEDDRY         |
| LKFR <b>ISHELE</b> | <b>SSSSEVN</b> |                    |                    |                   |                    |

sp|P16975|SPRC\_RAT (100 %), 34 295,7 Da

SPARC OS=Rattus norvegicus GN=Sparc PE=1 SV=4

16 exclusive unique peptides, 25 exclusive unique spectra, 155 total spectra, 181/301 amino acids (60 % coverage)

|                    |                     |                    |                   |                   |                   |
|--------------------|---------------------|--------------------|-------------------|-------------------|-------------------|
| MRAWIFFLLC         | LAGRALAAPQ          | TEAAEEMVAE         | ETVVEETGLP        | VGANPVQVEM        | GEFEEGAEET        |
| VEEVVAENPC         | QNHHCCKHGK <b>V</b> | <b>CELDESNTPM</b>  | <b>CVCQDPTSCP</b> | <b>APIGEFEKVC</b> | <b>SNDNKTFDSS</b> |
| <b>CHFFATKCTL</b>  | <b>EGTKKKGHLH</b>   | <b>LDYIGPKYI</b>   | <b>APCLDSELTE</b> | <b>FPLRMRDWLK</b> | <b>NVLVTLYERD</b> |
| <b>EGNNLLTEKIQ</b> | <b>KLRVKKIHEN</b>   | <b>EKRL EAGDHP</b> | <b>VELLARDFEK</b> | <b>NYNMYIFPVH</b> | <b>WQFGQLDQHP</b> |
| <b>IDGYLSHTEL</b>  | <b>APLRAPLIPM</b>   | <b>EHCTTRFFET</b>  | <b>CDLDNDKYIA</b> | <b>LEEWAGCFGI</b> | <b>KEQDINKDLV</b> |
| <b>I</b>           |                     |                    |                   |                   |                   |

sp|Q810F4|FAM3C\_RAT (100 %), 24 713,9 Da

Protein FAM3C OS=Rattus norvegicus GN=Fam3c PE=2 SV=1

2 exclusive unique peptides, 2 exclusive unique spectra, 2 total spectra, 20/227 amino acids (9 % coverage)

|             |                    |                   |             |            |                    |
|-------------|--------------------|-------------------|-------------|------------|--------------------|
| MRVAGA AKLV | VAVAVFLLTF         | YVISQVFEIK        | MDASLGSLFA  | RSALDSAIRS | TKPPRYKCGI         |
| SKACPEKHFA  | FK <b>MASGAANV</b> | <b>VGPKICLEDN</b> | VLMSGVKNNV  | GRGINVALVN | GK <b>TGDVIDTK</b> |
| YFDMWGGDVA  | PFIEFLKTIQ         | DGTVVLMATY        | DDGATKLT EE | ARRLIAELGS | TSITSLGFRD         |
| NWVFCGGKGI  | KTKSPFEQHI         | KNNKDTNKYE        | GWPEVVEMEG  | CIPQKQD    |                    |

sp|Q63532|SPR1A\_RAT (100 %), 16 731,5 Da

Cornifin-A OS=Rattus norvegicus GN=Sprr1a PE=2 SV=1

2 exclusive unique peptides, 2 exclusive unique spectra, 3 total spectra, 16/152 amino acids (11 % coverage)

|            |            |            |            |                   |                    |
|------------|------------|------------|------------|-------------------|--------------------|
| MSSQQQKQPC | TVPPQLHQHE | VKQPCQPPPQ | EPCAPKTKEP | CHPIPEPCNP        | K <b>VPEPCQPKV</b> |
| PEPCQPKVPE | PCQPKVPEPC | QCQVPEPCQP | KVPEPCQPKV | <b>PEPCHPKAPE</b> | PCHPVVPEPC         |
| QPVAPEPCQP | VVPEPCPPTV | TPSPYQQKTK | QK         |                   |                    |

**Modulation properties of bone marrow stromal cells released factors on activated microglia: in vitro study**

**Dasa Cizkova<sup>1,2\*</sup>, Stéphanie Devaux<sup>1\*</sup>, Françoise Le Marrec-Croq<sup>1</sup>, Julien Franck<sup>1</sup>, Lucia Slovinska<sup>2</sup>, Juraj Blasko<sup>2</sup>, Jan Rosocha<sup>3</sup>, Timea Spakova<sup>3</sup>, Christophe Lefebvre<sup>1</sup>, Isabelle Fournier<sup>1</sup>, Michel Salzet<sup>1</sup>**

**Supplementary data 3**

**Table. List of microglia morphological characteristics following CM treatment**

The morphological changes of BV2 cells and PM was defined by five following parameters: soma diameter, soma area, process diameter and length, and process length in relation to the soma diameter. Data were collected from measurements of 100 cells per CM treatment.

| <b>CM</b>           | <b>Microglia type</b> | <b>Soma diameter (µm)</b> | <b>Soma area (µm)</b> | <b>Process Diameter (µm)</b> | <b>Process Length (µm)</b> | <b>Process Length/ Soma Diameter</b> |
|---------------------|-----------------------|---------------------------|-----------------------|------------------------------|----------------------------|--------------------------------------|
| <b>DMEM</b>         | BV2 cells             | 12.3-15.9                 | 177.18 ± 98           | <1-none                      | < 7                        |                                      |
|                     | PM                    | 4,8-6.18                  | 71.56 ± 15            | <1                           | 40.2-50.6                  | > 10x                                |
| <b>SC-CM</b>        | BV2Cells              | 14.7-21.3                 | 408.21 ± 126.3        | <1-none                      | < 5                        |                                      |
|                     | PM                    | 6.9-7.18                  | 78.95 ± 10            | <2                           | 35.1-48.7                  | > 6x                                 |
| <b>SCI-CM</b>       | BV2 cells             | 18.6-44,5                 | 668.87 ± 200.7        | 2.1-4.2                      | 40.3-53.8                  | > 2x                                 |
|                     | PM                    | 24.2-28.1                 | 745.84 ± 115.3        | 1.3-4.9                      | 23.4-35.6                  | < 1x                                 |
| <b>SCI-CM-BMSCs</b> | BV2 cells             | 20.5-25.6                 | 709.21 ± 108          | <2                           | 10.3-13.5                  | < 1x                                 |
|                     | PM                    | 14.5-17.8                 | 214.18 ± 104          | <3                           | 23.4-30.8                  | > 1x                                 |

**marrow stromal cells released factors on activated microglia: in vitro study**

**Dasa Cizkova<sup>1,2\*</sup>, Stéphanie Devaux<sup>1\*</sup>, Françoise Le Marrec-Croq<sup>1</sup>, Julien Franck<sup>1</sup>, Lucia Slovinska<sup>2</sup>, J**

Experiment: msc

Peak List Generator: unknown

Version: unknown

Charge States Calculated: True

Deisotoped: True

Textual Annotation: unknown

Database Set: 2 Databases

Database Name: Rattus\_norvegicus\_Unipr

Version: unknown

Taxonomy: All Entries

Number of Proteins: 35683

Database Name: a subset of the RAT datab

Version: unknown

Taxonomy: All Entries

Number of Proteins: 28298

Does database contain common contamin

Search Engine Set: 2 Search Engines

Search Engine: Sequest

Version: 1.3.0.339

Samples: All Samples

Fragment Tolerance: 0,50 Da

Parent Tolerance: 10,0 PPM

Fixed Modifications: +57 on

Variable Modifications: +16

Database: Rattus\_norvegicu

Digestion Enzyme: Trypsin

Max Missed Cleavages: 3

Probability Model:

20130328-MS

091012\_CTL-0

091012\_L-02:

Search Engine: X! Tandem

Version: CYCLONE (2010.12.1

Samples: All Samples

Fragment Tolerance: 0,50 Da

Parent Tolerance: 10,0 PPM

Fixed Modifications: +57 on

Variable Modifications: -18 c

Database: a subset of the RA

Digestion Enzyme: Trypsin

Max Missed Cleavages: 2

Probability Model:

20130328-MS

091012\_CTL-0

091012\_L-02:

Scaffold: Version: Scaffold\_4.2.1

Modification Metadata Set: 1541 modificali

Source: C:\Program Files\Sca

Comment:

Protein Grouping Strategy: Experiment-wic

Peptide Thresholds: 97,0 % minimum  
 Protein Thresholds: 99,0 % minimum and 2  
 Peptide FDR: 0,1 % (Decoy)  
 Protein FDR: 1,0 % (Decoy)  
 GO Annotation Source(s):

| Experiment name | Biological sam | Biological sam | MS/MS sampl | Protein name     |
|-----------------|----------------|----------------|-------------|------------------|
| msc             | MSC            | MSC            | 20130328-MS | Isoform 2 of T   |
| msc             | MSC            | MSC            | 20130328-MS | Transgelin-2 C   |
| msc             | MSC            | MSC            | 20130328-MS | Protein Ube2I    |
| msc             | MSC            | MSC            | 20130328-MS | V-type proton    |
| msc             | MSC            | MSC            | 20130328-MS | Annexin A2 O     |
| msc             | MSC            | MSC            | 20130328-MS | C-type lectin c  |
| msc             | MSC            | MSC            | 20130328-MS | Protein Map2     |
| msc             | MSC            | MSC            | 20130328-MS | Fibulin 2, isofc |
| msc             | MSC            | MSC            | 20130328-MS | Keratin, type I  |
| msc             | MSC            | MSC            | 20130328-MS | Latent-transfc   |
| msc             | MSC            | MSC            | 20130328-MS | NADP-depend      |
| msc             | MSC            | MSC            | 20130328-MS | Glypican 4 OS    |
| msc             | MSC            | MSC            | 20130328-MS | Peroxiredoxin    |
| msc             | MSC            | MSC            | 20130328-MS | Macrophage-c     |
| msc             | MSC            | MSC            | 20130328-MS | Isoform 2 of A   |
| msc             | MSC            | MSC            | 20130328-MS | Kallikrein 6, is |
| msc             | MSC            | MSC            | 20130328-MS | L-lactate dehy   |
| msc             | MSC            | MSC            | 20130328-MS | Fibulin 1 (Prec  |
| msc             | MSC            | MSC            | 20130328-MS | Collagen alphi   |
| msc             | MSC            | MSC            | 20130328-MS | Protein Thbs2    |
| msc             | MSC            | MSC            | 20130328-MS | Calsyntenin-1    |
| msc             | MSC            | MSC            | 20130328-MS | Protein FAM3     |
| msc             | MSC            | MSC            | 20130328-MS | Protein Hbb-b    |
| msc             | MSC            | MSC            | 20130328-MS | Calumenin OS     |
| msc             | MSC            | MSC            | 20130328-MS | Protein Lamc1    |
| msc             | MSC            | MSC            | 20130328-MS | Isoform 3 of T   |
| msc             | MSC            | MSC            | 20130328-MS | Histone H2A t    |
| msc             | MSC            | MSC            | 20130328-MS | Collagen alphi   |
| msc             | MSC            | MSC            | 20130328-MS | Kinesin-1 heav   |
| msc             | MSC            | MSC            | 20130328-MS | Tubulin alpha-   |
| msc             | MSC            | MSC            | 20130328-MS | Spectrin alpha   |
| msc             | MSC            | MSC            | 20130328-MS | RCG32401, isc    |
| msc             | MSC            | MSC            | 20130328-MS | Protein Hepac    |
| msc             | MSC            | MSC            | 20130328-MS | Translationall   |
| msc             | MSC            | MSC            | 20130328-MS | Kininogen 1 O    |
| msc             | MSC            | MSC            | 20130328-MS | Follistatin-rela |
| msc             | MSC            | MSC            | 20130328-MS | Collagen alphi   |
| msc             | MSC            | MSC            | 20130328-MS | Protein IMPA(    |
| msc             | MSC            | MSC            | 20130328-MS | Protein Lamb:    |
| msc             | MSC            | MSC            | 20130328-MS | Lymphocyte c     |
| msc             | MSC            | MSC            | 20130328-MS | Annexin (Frag    |
| msc             | MSC            | MSC            | 20130328-MS | Decorin OS=R     |
| msc             | MSC            | MSC            | 20130328-MS | Dextrin OS=Ra    |
| msc             | MSC            | MSC            | 20130328-MS | Alpha 4 type \   |



|     |     |     |                              |
|-----|-----|-----|------------------------------|
| msc | MSC | MSC | 20130328-MS Protein Cfh O'   |
| msc | MSC | MSC | 20130328-MS Isoform 3 of C   |
| msc | MSC | MSC | 20130328-MS Procollagen-ly   |
| msc | MSC | MSC | 20130328-MS Protein Serpir   |
| msc | MSC | MSC | 20130328-MS Type II keratir  |
| msc | MSC | MSC | 20130328-MS Apolipoprotei    |
| msc | MSC | MSC | 20130328-MS Isoform V3 of    |
| msc | MSC | MSC | 20130328-MS 14-3-3 proteir   |
| msc | MSC | MSC | 20130328-MS Beta-2-microg    |
| msc | MSC | MSC | 20130328-MS Legumain OS=     |
| msc | MSC | MSC | 20130328-MS Actin, aortic s  |
| msc | MSC | MSC | 20130328-MS Protein Col8a:   |
| msc | MSC | MSC | 20130328-MS Uncharacteriz    |
| msc | MSC | MSC | 20130328-MS Phosphatidyle    |
| msc | MSC | MSC | 20130328-MS Protein Npep     |
| msc | MSC | MSC | 20130328-MS Peripherin OS    |
| msc | MSC | MSC | 20130328-MS Protein disulfi  |
| msc | MSC | MSC | 20130328-MS Fibulin-5 OS=f   |
| msc | MSC | MSC | 20130328-MS Mammalian e      |
| msc | MSC | MSC | 20130328-MS Inter-alpha-tr   |
| msc | MSC | MSC | 20130328-MS SPARC OS=Rai     |
| msc | MSC | MSC | 20130328-MS Gremlin-1 OS=    |
| msc | MSC | MSC | 20130328-MS Inositol mono    |
| msc | MSC | MSC | 20130328-MS Heat shock pr    |
| msc | MSC | MSC | 20130328-MS Plasminogen :    |
| msc | MSC | MSC | 20130328-MS Metalloprotei    |
| msc | MSC | MSC | 20130328-MS Protein Krt35    |
| msc | MSC | MSC | 20130328-MS Aggrecan core    |
| msc | MSC | MSC | 20130328-MS Sushi-repeat-    |
| msc | MSC | MSC | 20130328-MS Glycogen pho     |
| msc | MSC | MSC | 20130328-MS Osteopontin C    |
| msc | MSC | MSC | 20130328-MS Uncharacteriz    |
| msc | MSC | MSC | 20130328-MS Plastin 3 (T-isc |
| msc | MSC | MSC | 20130328-MS Histone H3 O'    |
| msc | MSC | MSC | 20130328-MS Adenylyl cycla   |
| msc | MSC | MSC | 20130328-MS Isoform Tau-B    |
| msc | MSC | MSC | 20130328-MS Afamin OS=Ra     |
| msc | MSC | MSC | 20130328-MS Gamma-synuc      |
| msc | MSC | MSC | 20130328-MS Lysozyme C-1     |
| msc | MSC | MSC | 20130328-MS Hemoglobin s     |
| msc | MSC | MSC | 20130328-MS LIM and SH3 c    |
| msc | MSC | MSC | 20130328-MS Procollagen, t   |
| msc | MSC | MSC | 20130328-MS Glutamate de     |
| msc | MSC | MSC | 20130328-MS Transcobalam     |
| msc | MSC | MSC | 20130328-MS Lactoylglutath   |
| msc | MSC | MSC | 20130328-MS ATP synthase     |
| msc | MSC | MSC | 20130328-MS Alpha-2-macri    |
| msc | MSC | MSC | 20130328-MS Transcription:   |
| msc | MSC | MSC | 20130328-MS Adenine phos     |
| msc | MSC | MSC | 20130328-MS Dihydropyrim     |
| msc | MSC | MSC | 20130328-MS Bone morpho      |

|     |     |     |                              |
|-----|-----|-----|------------------------------|
| msc | MSC | MSC | 20130328-MS Calmodulin O     |
| msc | MSC | MSC | 20130328-MS Alpha-1-antip    |
| msc | MSC | MSC | 20130328-MS Protein Col4a    |
| msc | MSC | MSC | 20130328-MS Actin, cytopla   |
| msc | MSC | MSC | 20130328-MS Pyruvate kina    |
| msc | MSC | MSC | 20130328-MS Histone H2B t    |
| msc | MSC | MSC | 20130328-MS Reticulon-4 O    |
| msc | MSC | MSC | 20130328-MS Brevican core    |
| msc | MSC | MSC | 20130328-MS Insulin-like gro |
| msc | MSC | MSC | 20130328-MS Rabphilin-3A (   |
| msc | MSC | MSC | 20130328-MS Vimentin OS=     |
| msc | MSC | MSC | 20130328-MS Uncharacteriz    |
| msc | MSC | MSC | 20130328-MS Heat shock 70    |
| msc | MSC | MSC | 20130328-MS Inter-alpha tr   |
| msc | MSC | MSC | 20130328-MS Myelin-associ    |
| msc | MSC | MSC | 20130328-MS Protein-lysine   |
| msc | MSC | MSC | 20130328-MS Protein Hspg2    |
| msc | MSC | MSC | 20130328-MS Apolipoprotei    |
| msc | MSC | MSC | 20130328-MS Procollagen, t   |
| msc | MSC | MSC | 20130328-MS Protein Txndc    |
| msc | MSC | MSC | 20130328-MS Collagen alph    |
| msc | MSC | MSC | 20130328-MS Alpha-enolase    |
| msc | MSC | MSC | 20130328-MS Protein Ncam     |
| msc | MSC | MSC | 20130328-MS Isoform TGF-k    |
| msc | MSC | MSC | 20130328-MS Isoform 2 of C   |
| msc | MSC | MSC | 20130328-MS ATP synthase     |
| msc | MSC | MSC | 20130328-MS Polyubiquitin-   |
| msc | MSC | MSC | 20130328-MS Murinoglobuli    |
| msc | MSC | MSC | 20130328-MS Serine protea    |
| msc | MSC | MSC | 20130328-MS Keratin, type I  |
| msc | MSC | MSC | 20130328-MS Glypican-1 OS    |
| msc | MSC | MSC | 20130328-MS Serine (Or cys   |
| msc | MSC | MSC | 20130328-MS Isoform 1 of C   |
| msc | MSC | MSC | 20130328-MS Heat shock pr    |
| msc | MSC | MSC | 20130328-MS Hexokinase-1     |
| msc | MSC | MSC | 20130328-MS Junction plack   |
| msc | MSC | MSC | 20130328-MS Protein Ank2 (   |
| msc | MSC | MSC | 20130328-MS Vinculin OS=R    |
| msc | MSC | MSC | 20130328-MS Clathrin heavy   |
| msc | MSC | MSC | 20130328-MS NAD(P)H dehy     |
| msc | MSC | MSC | 20130328-MS Mast cell carb   |
| msc | MSC | MSC | 20130328-MS Protein FAM1     |
| msc | MSC | MSC | 20130328-MS Lysyl oxidase-   |
| msc | MSC | MSC | 20130328-MS Keratin, type I  |
| msc | MSC | MSC | 20130328-MS Filamin alpha    |
| msc | MSC | MSC | 20130328-MS Isoform 2 of S   |
| msc | MSC | MSC | 20130328-MS Follistatin-rel  |
| msc | MSC | MSC | 20130328-MS Monocyte diff    |
| msc | MSC | MSC | 20130328-MS Glutamine syr    |
| msc | MSC | MSC | 20130328-MS Cathepsin D C    |
| msc | MSC | MSC | 20130328-MS Keratin, type I  |

|     |     |     |                             |
|-----|-----|-----|-----------------------------|
| msc | MSC | MSC | 20130328-MS Alpha-actinin-  |
| msc | MSC | MSC | 20130328-MS Serine protea:  |
| msc | MSC | MSC | 20130328-MS Nucleoside di:  |
| msc | MSC | MSC | 20130328-MS Uncharacteriz   |
| msc | MSC | MSC | 20130328-MS Protein Itih2 C |
| msc | MSC | MSC | 20130328-MS Uncharacteriz   |
| msc | MSC | MSC | 20130328-MS Complement C    |
| msc | MSC | MSC | 20130328-MS Procollagen C   |
| msc | MSC | MSC | 20130328-MS Adenylate kin   |
| msc | MSC | MSC | 20130328-MS Protein Psat1   |
| msc | MSC | MSC | 20130328-MS Superoxide di   |
| msc | MSC | MSC | 20130328-MS Collagen alph:  |
| msc | MSC | MSC | 20130328-MS Uncharacteriz   |
| msc | MSC | MSC | 20130328-MS Protein Itih4 C |
| msc | MSC | MSC | 20130328-MS Protein Zc3h1   |
| msc | MSC | MSC | 20130328-MS Peptidyl-proly  |
| msc | MSC | MSC | 20130328-MS 60S acidic ribc |
| msc | MSC | MSC | 20130328-MS Aspartate ami   |
| msc | MSC | MSC | 20130328-MS Fibronectin O:  |
| msc | MSC | MSC | 20130328-MS Uncharacteriz   |
| msc | MSC | MSC | 20130328-MS 6-phosphoglu    |
| msc | MSC | MSC | 20130328-MS Transforming    |
| msc | MSC | MSC | 20130328-MS Apolipoprotei   |
| msc | MSC | MSC | 20130328-MS Protein LOC10   |
| msc | MSC | MSC | 20130328-MS Peroxiredoxin   |
| msc | MSC | MSC | 20130328-MS Tubulin beta-3  |
| msc | MSC | MSC | 20130328-MS Complement C    |
| msc | MSC | MSC | 20130328-MS Growth arrest   |
| msc | MSC | MSC | 20130328-MS Fibrinogen be   |
| msc | MSC | MSC | 20130328-MS Histone H4 O5   |
| msc | MSC | MSC | 20130328-MS Osteoglycin (F  |
| msc | MSC | MSC | 20130328-MS Protein disulfi |
| msc | MSC | MSC | 20130328-MS Isoform Gamr    |
| msc | MSC | MSC | 20130328-MS Nucleobindin-   |
| msc | MSC | MSC | 20130328-MS Plasminogen C   |
| msc | MSC | MSC | 20130328-MS Sulfated glyco  |
| msc | MSC | MSC | 20130328-MS Peptidyl-proly  |
| msc | MSC | MSC | 20130328-MS Platelet-deriv  |
| msc | MSC | MSC | 20130328-MS Keratin, type I |
| msc | MSC | MSC | 20130328-MS Protein Dkk3 C  |
| msc | MSC | MSC | 20130328-MS Connective tis  |
| msc | MSC | MSC | 20130328-MS Isoform Crk-I   |
| msc | MSC | MSC | 20130328-MS Phosphoglyce    |
| msc | MSC | MSC | 20130328-MS Microtubule-a   |
| msc | MSC | MSC | 20130328-MS Secernin-1 OS   |
| msc | MSC | MSC | 20130328-MS Complement C    |
| msc | MSC | MSC | 20130328-MS Alcohol dehyd   |
| msc | MSC | MSC | 20130328-MS CARG-binding    |
| msc | MSC | MSC | 20130328-MS Neurofilamen    |
| msc | MSC | MSC | 20130328-MS Keratin, type I |
| msc | MSC | MSC | 20130328-MS 14-3-3 proteir  |

|     |     |     |                              |
|-----|-----|-----|------------------------------|
| msc | MSC | MSC | 20130328-MS Uncharacteriz    |
| msc | MSC | MSC | 20130328-MS Nidogen-1 OS     |
| msc | MSC | MSC | 20130328-MS 72 kDa type I    |
| msc | MSC | MSC | 20130328-MS Protein Dsp O    |
| msc | MSC | MSC | 20130328-MS Spondin-2 OS     |
| msc | MSC | MSC | 20130328-MS Neurofilamen     |
| msc | MSC | MSC | 20130328-MS Neural cell ad   |
| msc | MSC | MSC | 20130328-MS Glucose-6-ph     |
| msc | MSC | MSC | 20130328-MS Uncharacteriz    |
| msc | MSC | MSC | 20130328-MS Prelamin-A/C     |
| msc | MSC | MSC | 20130328-MS Isoform 3 of N   |
| msc | MSC | MSC | 20130328-MS Dipeptidyl pep   |
| msc | MSC | MSC | 20130328-MS Uncharacteriz    |
| msc | MSC | MSC | 20130328-MS Procollagen, t   |
| msc | MSC | MSC | 20130328-MS Cofilin-1 OS=F   |
| msc | MSC | MSC | 20130328-MS Isoform IB of    |
| msc | MSC | MSC | 20130328-MS Tubulin alpha-   |
| msc | MSC | MSC | 20130328-MS Complement c     |
| msc | MSC | MSC | 20130328-MS Isoform 2 of N   |
| msc | MSC | MSC | 20130328-MS Carbonic anhy    |
| msc | MSC | MSC | 20130328-MS Neuropilin-2 C   |
| msc | MSC | MSC | 20130328-MS Keratin, type I  |
| msc | MSC | MSC | 20130328-MS Alpha-1-macru    |
| msc | MSC | MSC | 20130328-MS Ubiquitin carb   |
| msc | MSC | MSC | 20130328-MS Glial fibrillary |
| msc | MSC | MSC | 20130328-MS Rab GDP dissc    |
| msc | MSC | MSC | 20130328-MS Phosphorylas     |
| msc | MSC | MSC | 20130328-MS 14-3-3 proteir   |
| msc | MSC | MSC | 20130328-MS Transforming     |
| msc | MSC | MSC | 20130328-MS Creatine kinas   |
| msc | MSC | MSC | 20130328-MS Protein Sema     |
| msc | MSC | MSC | 20130328-MS Adipocyte en     |
| msc | MSC | MSC | 20130328-MS Superoxide di    |
| msc | MSC | MSC | 20130328-MS Uncharacteriz    |
| msc | MSC | MSC | 20130328-MS Hyaluronan ar    |
| msc | MSC | MSC | 20130328-MS Glutathione S-   |
| msc | MSC | MSC | 20130328-MS Glutamate [NI    |
| msc | MSC | MSC | 20130328-MS Serum albumi     |
| msc | MSC | MSC | 20130328-MS Epididymal se    |
| msc | MSC | MSC | 20130328-MS Rho GDP-diss     |
| msc | MSC | MSC | 20130328-MS Peptidyl-proly   |
| msc | MSC | MSC | 20130328-MS A disintegrin a  |
| msc | MSC | MSC | 20130328-MS Cathepsin B O    |
| msc | MSC | MSC | 20130328-MS Procollagen-ly   |
| msc | MSC | MSC | 20130328-MS Latent transfo   |
| msc | MSC | MSC | 20130328-MS Microtubule-a    |
| msc | MSC | MSC | 20130328-MS Thioredoxin C    |
| msc | MSC | MSC | 20130328-MS WD repeat-co     |
| msc | MSC | MSC | 20130328-MS Myelin protec    |
| msc | MSC | MSC | 20130328-MS Malate dehyd     |
| msc | MSC | MSC | 20130328-MS C1qtnf3 prote    |

|     |     |     |                             |
|-----|-----|-----|-----------------------------|
| msc | MSC | MSC | 20130328-MS Protein Krt32   |
| msc | MSC | MSC | 20130328-MS Glyceraldehyc   |
| msc | MSC | MSC | 20130328-MS Alpha-centrac   |
| msc | MSC | MSC | 20130328-MS Protein SET O:  |
| msc | MSC | MSC | 20130328-MS Transthyretin   |
| msc | MSC | MSC | 20130328-MS Vitamin D-bin   |
| msc | MSC | MSC | 20130328-MS Uncharacteriz   |
| msc | MSC | MSC | 20130328-MS Synaptosomal    |
| msc | MSC | MSC | 20130328-MS Latexin OS=Ra   |
| msc | MSC | MSC | 20130328-MS Apolipoprotei   |
| msc | MSC | MSC | 20130328-MS Uncharacteriz   |
| msc | MSC | MSC | 20130328-MS Keratin, type I |
| msc | MSC | MSC | 20130328-MS Sodium/potas    |
| msc | MSC | MSC | 20130328-MS Isoform B of A  |
| msc | MSC | MSC | 20130328-MS Keratin, type I |
| msc | MSC | MSC | 20130328-MS Neuronal cell   |
| msc | MSC | MSC | 20130328-MS Protein Sh3bg   |
| msc | MSC | MSC | 20130328-MS Peroxiredoxin   |
| msc | MSC | MSC | 20130328-MS Dihydropyrim    |
| msc | MSC | MSC | 20130328-MS Protein AMBP    |
| msc | MSC | MSC | 20130328-MS Chaperonin cc   |
| msc | MSC | MSC | 20130328-MS Cysteine and §  |
| msc | MSC | MSC | 20130328-MS Protein S100a   |
| msc | MSC | MSC | 20130328-MS Hemopexin O:    |
| msc | MSC | MSC | 20130328-MS Placenta grow   |
| msc | MSC | MSC | 20130328-MS Hyaluronan ar   |
| msc | MSC | MSC | 20130328-MS Microtubule-α   |
| msc | MSC | MSC | 20130328-MS Lactadherin O   |
| msc | MSC | MSC | 20130328-MS Complement (    |
| msc | MSC | MSC | 20130328-MS Biglycan OS=R   |
| msc | MSC | MSC | 20130328-MS Protein Lama    |
| msc | MSC | MSC | 20130328-MS Alpha-1-inhibi  |
| msc | MSC | MSC | 20130328-MS Disintegrin an  |
| msc | MSC | MSC | 20130328-MS Profilin-2 OS=  |
| msc | MSC | MSC | 20130328-MS Tubulin beta-1  |
| msc | MSC | MSC | 20130328-MS Vesicle-fusing  |
| msc | MSC | MSC | 20130328-MS Keratin, type I |
| msc | MSC | MSC | 20130328-MS Heat shock co   |
| msc | MSC | MSC | 20130328-MS Calretinin OS=  |
| msc | MSC | MSC | 20130328-MS Acylphosphat    |
| msc | MSC | MSC | 20130328-MS Cathepsin L1 (  |
| msc | MSC | MSC | 20130328-MS Protein Krt86   |
| msc | MSC | MSC | 20130328-MS L-lactate dehy  |
| msc | MSC | MSC | 20130328-MS Collagen alph   |
| msc | MSC | MSC | 20130328-MS Fructose-bispl  |
| msc | MSC | MSC | 20130328-MS Lumican OS=F    |
| msc | MSC | MSC | 20130328-MS Moesin (Fragr   |
| msc | MSC | MSC | 20130328-MS Protein Col6a:  |
| msc | MSC | MSC | 20130328-MS Plakophilin 1 ( |
| msc | MSC | MSC | 20130328-MS Hydroxyacyl g   |
| msc | MSC | MSC | 20130328-MS Haptoglobin C   |

|     |     |     |                             |
|-----|-----|-----|-----------------------------|
| msc | MSC | MSC | 20130328-MS Fibronectin O:  |
| msc | MSC | MSC | 20130328-MS Collagen alph:  |
| msc | MSC | MSC | 20130328-MS Acylphosphat:   |
| msc | MSC | MSC | 20130328-MS Fibrinogen alp  |
| msc | MSC | MSC | 20130328-MS Glutathione S-  |
| msc | MSC | MSC | 20130328-MS Uncharacteriz   |
| msc | MSC | MSC | 20130328-MS Nucleobindin-   |
| msc | MSC | MSC | 20130328-MS Matrix Gla pro  |
| msc | MSC | MSC | 20130328-MS Transitional ei |
| msc | MSC | MSC | 20130328-MS 14-3-3 proteir  |
| msc | MSC | MSC | 20130328-MS Actin-related   |
| msc | MSC | MSC | 20130328-MS Protein LOC10   |
| msc | MSC | MSC | 20130328-MS Protein LOC10   |
| msc | MSC | MSC | 20130328-MS Beta-galactosi  |
| msc | MSC | MSC | 20130328-MS Nucleoside dij  |
| msc | MSC | MSC | 20130328-MS Keratin, type I |
| msc | MSC | MSC | 20130328-MS Ectonucleotid   |
| msc | MSC | MSC | 20130328-MS Isoform 2 of P  |
| msc | MSC | MSC | 20130328-MS Ubiquitin thio  |
| msc | MSC | MSC | 20130328-MS Alpha-2-HS-gl   |
| msc | MSC | MSC | 20130328-MS Malate dehyd    |
| msc | MSC | MSC | 20130328-MS Cornifin-A OS:  |
| msc | MSC | MSC | 20130328-MS Acyl-CoA-bind   |
| msc | MSC | MSC | 20130328-MS Protein CutA (  |
| msc | MSC | MSC | 20130328-MS Extracellular s |
| msc | MSC | MSC | 20130328-MS Protein Serpir  |
| msc | MSC | MSC | 20130328-MS Protein Krt31   |
| msc | MSC | MSC | 20130328-MS Uncharacteriz   |
| msc | MSC | MSC | 20130328-MS Uncharacteriz   |
| msc | MSC | MSC | 20130328-MS Thy-1 membr:    |
| msc | MSC | MSC | 20130328-MS Olfactomedin-   |
| msc | MSC | MSC | 20130328-MS Inhibin beta A  |
| msc | MSC | MSC | 20130328-MS Thioredoxin-li  |
| msc | MSC | MSC | 20130328-MS Serine protea:  |
| msc | MSC | MSC | 20130328-MS Guanine dean    |
| msc | MSC | MSC | 20130328-MS Isoform 3 of N  |
| msc | MSC | MSC | 20130328-MS Calpain small   |
| msc | MSC | MSC | 20130328-MS Heat shock 70   |
| msc | MSC | MSC | 20130328-MS Annexin A5 O:   |
| msc | MSC | MSC | 20130328-MS Clusterin OS=l  |
| msc | MSC | MSC | 20130328-MS Uncharacteriz   |
| msc | MSC | MSC | 20130328-MS Aldose reduct   |
| msc | MSC | MSC | 20130328-MS Tubulin polyr   |
| msc | MSC | MSC | 20130328-MS Annexin A1 O:   |
| msc | MSC | MSC | 20130328-MS Anionic trypsi  |
| msc | MSC | MSC | 20130328-MS 2',3'-cyclic-nu |
| msc | MSC | MSC | 20130328-MS Granulins OS=   |
| msc | MSC | MSC | 20130328-MS Protein Col6a:  |
| msc | MSC | MSC | 20130328-MS Uncharacteriz   |
| msc | MSC | MSC | 20130328-MS Triosephosph:   |
| msc | MSC | MSC | 20130328-MS Profilin-1 OS=  |

|     |     |     |                             |
|-----|-----|-----|-----------------------------|
| msc | MSC | MSC | 20130328-MS Isoform B of Ii |
| msc | MSC | MSC | 20130328-MS Neuromodulir    |
| msc | MSC | MSC | 20130328-MS Transketolase   |
| msc | MSC | MSC | 20130328-MS Elongation fac  |
| msc | MSC | MSC | 20130328-MS Serotransferri  |
| msc | MSC | MSC | 20130328-MS Protein Krt76   |
| msc | MSC | MSC | 20130328-MS Acid ceramida   |
| msc | MSC | MSC | 20130328-MS Uncharacteriz   |
| msc | MSC | MSC | 20130328-MS Neurofilamen    |
| msc | MSC | MSC | 20130328-MS Cystatin-C OS:  |
| msc | MSC | MSC | 20130328-MS FK506 binding   |
| msc | MSC | MSC | 20130328-MS Galectin-1 OS:  |
| msc | MSC | MSC | 20130328-MS Protein Flnc O  |
| msc | MSC | MSC | 20130328-MS Matrix-remod    |
| msc | MSC | MSC | 20130328-MS 14-3-3 proteir  |
| msc | MSC | MSC | 20130328-MS Fibronectin ty  |
| msc | MSC | MSC | 20130328-MS Uncharacteriz   |
| msc | MSC | MSC | 20130328-MS Dynein light cl |
| msc | MSC | MSC | 20130328-MS Aconitate hyd   |
| msc | MSC | MSC | 20130328-MS Calcium/calm    |
| msc | MSC | MSC | 20130328-MS 6-phosphoglu    |
| msc | MSC | MSC | 20130328-MS Elongation fac  |
| msc | MSC | MSC | 20130328-MS Uncharacteriz   |
| msc | MSC | MSC | 20130328-MS Uncharacteriz   |
| msc | MSC | MSC | 20130328-MS Protein Col6a:  |
| msc | MSC | MSC | 20130328-MS 4-trimethylarr  |
| msc | MSC | MSC | 20130328-MS Uncharacteriz   |
| msc | MSC | MSC | 20130328-MS Serpin B5 OS=   |
| msc | MSC | MSC | 20130328-MS Uncharacteriz   |
| msc | MSC | MSC | 20130328-MS Ig gamma-2A     |
| msc | MSC | MSC | 20130328-MS HtrA serine pe  |
| msc | MSC | MSC | 20130328-MS Protein NOV f   |
| msc | MSC | MSC | 20130328-MS Protein LOC67   |
| msc | MSC | MSC | 20130328-MS Cytochrome c    |
| msc | MSC | MSC | 20130328-MS Ubiquitin cark  |
| msc | MSC | MSC | 20130328-MS Coiled-coil do  |
| msc | MSC | MSC | 20130328-MS Purine nucleo   |
| msc | MSC | MSC | 20130328-MS Protein Col4a:  |
| msc | MSC | MSC | 20130328-MS Peroxiredoxin   |
| msc | MSC | MSC | 20130328-MS Macrophage r    |
| msc | MSC | MSC | 20130328-MS Alpha-actinin-  |
| msc | MSC | MSC | 20130328-MS 2,3-bisphosph   |
| msc | MSC | MSC | 20130328-MS F-actin-cappir  |
| msc | MSC | MSC | 20130328-MS Tubulin beta-;  |
| msc | MSC | MSC | 20130328-MS Protein Zfp23   |
| msc | MSC | MSC | 20130328-MS Metalloprotei   |
| msc | MSC | MSC | 20130328-MS Adenosylhom     |
| msc | MSC | MSC | 20130328-MS Isoform 2 of C  |
| msc | MSC | MSC | 20130328-MS Protein Dag1 (  |
| msc | MSC | MSC | 20130328-MS Actin related j |
| msc | MSC | MSC | 20130328-MS D-dopachrom     |

|     |         |         |                              |
|-----|---------|---------|------------------------------|
| msc | MSC     | MSC     | 20130328-MS Hemoglobin s     |
| msc | MSC     | MSC     | 20130328-MS Ab2-162 OS=F     |
| msc | MSC     | MSC     | 20130328-MS Fructose-bispl   |
| msc | MSC     | MSC     | 20130328-MS 78 kDa glucos    |
| msc | MSC     | MSC     | 20130328-MS Aminoacylase     |
| msc | MSC     | MSC     | 20130328-MS Protein Col5a1   |
| msc | MSC     | MSC     | 20130328-MS Uncharacteriz    |
| msc | MSC     | MSC     | 20130328-MS Transgelin OS=   |
| msc | MSC     | MSC     | 20130328-MS Plectin (Fragr   |
| msc | MSC     | MSC     | 20130328-MS Isoform 2 of A   |
| msc | MSC     | MSC     | 20130328-MS EGF-containin    |
| msc | MSC     | MSC     | 20130328-MS Keratin, type I  |
| msc | MSC     | MSC     | 20130328-MS Fatty acid-bin   |
| msc | MSC     | MSC     | 20130328-MS Protein Pxdn (   |
| msc | MSC     | MSC     | 20130328-MS Protein Ccbe1    |
| msc | MSC     | MSC     | 20130328-MS Keratin, type I  |
| msc | MSC     | MSC     | 20130328-MS Protein Krt16    |
| msc | MSC     | MSC     | 20130328-MS Periostin, oste  |
| msc | MSC     | MSC     | 20130328-MS Protein S100-,   |
| msc | MSC     | MSC     | 20130328-MS Ribonuclease     |
| msc | MSC     | MSC     | 20130328-MS Myosin light p   |
| msc | MSC     | MSC     | 20130328-MS Glutathione S-   |
| msc | MSC     | MSC     | 20130328-MS Ferritin OS=Ra   |
| msc | MSC     | MSC     | 20130328-MS Collagen alph    |
| msc | MSC     | MSC     | 20130328-MS Glutathione S-   |
| msc | MSC     | MSC     | 20130328-MS Myosin-9 OS=     |
| msc | MSC     | MSC     | 20130328-MS Gamma-enola      |
| msc | MSC     | MSC     | 20130328-MS Protein Rrbp1    |
| msc | MSC     | MSC     | 20130328-MS Fetuin-B OS=F    |
| msc | MSC     | MSC     | 20130328-MS Rab GDP dissc    |
| msc | Control | Control | 091012_CTL-C Protein LOC67   |
| msc | Control | Control | 091012_CTL-C Uncharacteriz   |
| msc | Control | Control | 091012_CTL-C Keratin, type I |
| msc | Control | Control | 091012_CTL-C Protein Rrbp1   |
| msc | Control | Control | 091012_CTL-C Protein FAM1    |
| msc | Control | Control | 091012_CTL-C Beta-galactosi  |
| msc | Control | Control | 091012_CTL-C Mast cell carb  |
| msc | Control | Control | 091012_CTL-C Cytochrome c    |
| msc | Control | Control | 091012_CTL-C Procollagen-ly  |
| msc | Control | Control | 091012_CTL-C Glyceraldehyc   |
| msc | Control | Control | 091012_CTL-C Uncharacteriz   |
| msc | Control | Control | 091012_CTL-C Neuronal cell   |
| msc | Control | Control | 091012_CTL-C Fibronectin O:  |
| msc | Control | Control | 091012_CTL-C Protein Zfp231  |
| msc | Control | Control | 091012_CTL-C Glutathione S-  |
| msc | Control | Control | 091012_CTL-C Plasminogen (   |
| msc | Control | Control | 091012_CTL-C Glutamate [NI   |
| msc | Control | Control | 091012_CTL-C Disintegrin an  |
| msc | Control | Control | 091012_CTL-C Ig gamma-2A     |
| msc | Control | Control | 091012_CTL-C Clathrin heav   |
| msc | Control | Control | 091012_CTL-C Glucose-6-phc   |



|     |         |         |                               |
|-----|---------|---------|-------------------------------|
| msc | Control | Control | 091012_CTL-C Guanine deam     |
| msc | Control | Control | 091012_CTL-C Isoform 2 of C   |
| msc | Control | Control | 091012_CTL-C Protein LOC10    |
| msc | Control | Control | 091012_CTL-C Olfactomedin     |
| msc | Control | Control | 091012_CTL-C Phosphorylase    |
| msc | Control | Control | 091012_CTL-C Protein Col4a1   |
| msc | Control | Control | 091012_CTL-C CARG-binding     |
| msc | Control | Control | 091012_CTL-C Myosin light p   |
| msc | Control | Control | 091012_CTL-C Alpha-1-inhibi   |
| msc | Control | Control | 091012_CTL-C Fatty acid-bin   |
| msc | Control | Control | 091012_CTL-C Acid ceramida    |
| msc | Control | Control | 091012_CTL-C Latent transfo   |
| msc | Control | Control | 091012_CTL-C 60S acidic ribc  |
| msc | Control | Control | 091012_CTL-C Glypican-1 OS    |
| msc | Control | Control | 091012_CTL-C Protein Serpir   |
| msc | Control | Control | 091012_CTL-C Elongation fac   |
| msc | Control | Control | 091012_CTL-C Adipocyte enl    |
| msc | Control | Control | 091012_CTL-C Uncharacteriz    |
| msc | Control | Control | 091012_CTL-C Myosin-9 OS=     |
| msc | Control | Control | 091012_CTL-C SPARC OS=Raf     |
| msc | Control | Control | 091012_CTL-C Glypican 4 OS    |
| msc | Control | Control | 091012_CTL-C Decorin OS=R     |
| msc | Control | Control | 091012_CTL-C Matrix Gla pro   |
| msc | Control | Control | 091012_CTL-C Fatty acid-bin   |
| msc | Control | Control | 091012_CTL-C Profilin-1 OS=   |
| msc | Control | Control | 091012_CTL-C 14-3-3 proteir   |
| msc | Control | Control | 091012_CTL-C Collagen alph    |
| msc | Control | Control | 091012_CTL-C Inter-alpha-tr   |
| msc | Control | Control | 091012_CTL-C Hexokinase-1     |
| msc | Control | Control | 091012_CTL-C NADP-depend      |
| msc | Control | Control | 091012_CTL-C Uncharacteriz    |
| msc | Control | Control | 091012_CTL-C Plakophilin 1 (  |
| msc | Control | Control | 091012_CTL-C Nucleoside di    |
| msc | Control | Control | 091012_CTL-C Lysyl oxidase-   |
| msc | Control | Control | 091012_CTL-C Translationall   |
| msc | Control | Control | 091012_CTL-C Bone morpho      |
| msc | Control | Control | 091012_CTL-C A disintegrin a  |
| msc | Control | Control | 091012_CTL-C Malate dehyd     |
| msc | Control | Control | 091012_CTL-C Alpha-enolase    |
| msc | Control | Control | 091012_CTL-C Protein Map2     |
| msc | Control | Control | 091012_CTL-C Follistatin-rela |
| msc | Control | Control | 091012_CTL-C Alpha 4 type \   |
| msc | Control | Control | 091012_CTL-C Alpha-interne    |
| msc | Control | Control | 091012_CTL-C Afamin OS=Ra     |
| msc | Control | Control | 091012_CTL-C Metalloprotei    |
| msc | Control | Control | 091012_CTL-C Protein Col6a1   |
| msc | Control | Control | 091012_CTL-C Peroxiredoxin    |
| msc | Control | Control | 091012_CTL-C Oligodendroc     |
| msc | Control | Control | 091012_CTL-C Uncharacteriz    |
| msc | Control | Control | 091012_CTL-C L-lactate dehy   |
| msc | Control | Control | 091012_CTL-C Connective tis   |

|     |         |         |                               |
|-----|---------|---------|-------------------------------|
| msc | Control | Control | 091012_CTL-C FK506 binding    |
| msc | Control | Control | 091012_CTL-C Plectin (Fragr   |
| msc | Control | Control | 091012_CTL-C Peptidyl-proly   |
| msc | Control | Control | 091012_CTL-C Nucleobindin-    |
| msc | Control | Control | 091012_CTL-C Galectin-1 OS:   |
| msc | Control | Control | 091012_CTL-C Fructose-bispl   |
| msc | Control | Control | 091012_CTL-C Protein Hspg2    |
| msc | Control | Control | 091012_CTL-C Rabphilin-3A (   |
| msc | Control | Control | 091012_CTL-C Keratin, type I  |
| msc | Control | Control | 091012_CTL-C Heat shock pr    |
| msc | Control | Control | 091012_CTL-C Alpha-2-HS-gl    |
| msc | Control | Control | 091012_CTL-C Complement (     |
| msc | Control | Control | 091012_CTL-C Biglycan OS=R    |
| msc | Control | Control | 091012_CTL-C Calmodulin O'    |
| msc | Control | Control | 091012_CTL-C Moesin (Fragr    |
| msc | Control | Control | 091012_CTL-C Beta-2-microg    |
| msc | Control | Control | 091012_CTL-C Extracellular s  |
| msc | Control | Control | 091012_CTL-C Cathepsin D C    |
| msc | Control | Control | 091012_CTL-C Uncharacteriz    |
| msc | Control | Control | 091012_CTL-C Protein Krt16    |
| msc | Control | Control | 091012_CTL-C Protein Krt31    |
| msc | Control | Control | 091012_CTL-C Platelet-deriv   |
| msc | Control | Control | 091012_CTL-C Uncharacteriz    |
| msc | Control | Control | 091012_CTL-C Aggrecan core    |
| msc | Control | Control | 091012_CTL-C Phosphoglyce     |
| msc | Control | Control | 091012_CTL-C Histone H2A t    |
| msc | Control | Control | 091012_CTL-C Tubulin alpha-   |
| msc | Control | Control | 091012_CTL-C Protein Lamb:    |
| msc | Control | Control | 091012_CTL-C Keratin, type I  |
| msc | Control | Control | 091012_CTL-C Uncharacteriz    |
| msc | Control | Control | 091012_CTL-C Collagen alph:   |
| msc | Control | Control | 091012_CTL-C Procollagen, t   |
| msc | Control | Control | 091012_CTL-C Isoform B of Ii  |
| msc | Control | Control | 091012_CTL-C Complement (     |
| msc | Control | Control | 091012_CTL-C Cathepsin B O    |
| msc | Control | Control | 091012_CTL-C Fibulin 1 (Prec  |
| msc | Control | Control | 091012_CTL-C Uncharacteriz    |
| msc | Control | Control | 091012_CTL-C Glial fibrillary |
| msc | Control | Control | 091012_CTL-C Lumican OS=F     |
| msc | Control | Control | 091012_CTL-C Keratin, type I  |
| msc | Control | Control | 091012_CTL-C Triosephosphi    |
| msc | Control | Control | 091012_CTL-C Fibronectin ty   |
| msc | Control | Control | 091012_CTL-C Protein DJ-1 C   |
| msc | Control | Control | 091012_CTL-C Alpha-1-macri    |
| msc | Control | Control | 091012_CTL-C Isoform 3 of N   |
| msc | Control | Control | 091012_CTL-C Junction plack   |
| msc | Control | Control | 091012_CTL-C Polyubiquitin-   |
| msc | Control | Control | 091012_CTL-C Protein Itih2 C  |
| msc | Control | Control | 091012_CTL-C Collagen alph:   |
| msc | Control | Control | 091012_CTL-C Uncharacteriz    |
| msc | Control | Control | 091012_CTL-C Transgelin OS:   |

|     |         |         |                              |
|-----|---------|---------|------------------------------|
| msc | Control | Control | 091012_CTL-C Lactadherin O   |
| msc | Control | Control | 091012_CTL-C Latent-transfc  |
| msc | Control | Control | 091012_CTL-C Granulins OS=   |
| msc | Control | Control | 091012_CTL-C Protein Flnc O  |
| msc | Control | Control | 091012_CTL-C Growth arrest   |
| msc | Control | Control | 091012_CTL-C Sodium/potas    |
| msc | Control | Control | 091012_CTL-C Neuropilin-2 C  |
| msc | Control | Control | 091012_CTL-C Protein S100-,  |
| msc | Control | Control | 091012_CTL-C Epididymal se   |
| msc | Control | Control | 091012_CTL-C Fibronectin O:  |
| msc | Control | Control | 091012_CTL-C Protein-lysine  |
| msc | Control | Control | 091012_CTL-C Vinculin OS=R   |
| msc | Control | Control | 091012_CTL-C Filamin alpha   |
| msc | Control | Control | 091012_CTL-C Annexin A1 O:   |
| msc | Control | Control | 091012_CTL-C Vimentin OS=    |
| msc | Control | Control | 091012_CTL-C Cystatin-C OS:  |
| msc | Control | Control | 091012_CTL-C Alcohol dehydc  |
| msc | Control | Control | 091012_CTL-C Histone H4 O:   |
| msc | Control | Control | 091012_CTL-C Hemoglobin s    |
| msc | Control | Control | 091012_CTL-C Periostin, oste |
| msc | Control | Control | 091012_CTL-C Collagen alph:  |
| msc | Control | Control | 091012_CTL-C Anionic trypsi  |
| msc | Control | Control | 091012_CTL-C Fibulin-5 OS=f  |
| msc | Control | Control | 091012_CTL-C Metalloprotei   |
| msc | Control | Control | 091012_CTL-C Protein NOV f   |
| msc | Control | Control | 091012_CTL-C Purine nucleo   |
| msc | Control | Control | 091012_CTL-C Collagen alph:  |
| msc | Control | Control | 091012_CTL-C Macrophage r    |
| msc | Control | Control | 091012_CTL-C Actin, aortic s |
| msc | Control | Control | 091012_CTL-C Protein Lama:   |
| msc | Control | Control | 091012_CTL-C Uncharacteriz   |
| msc | Control | Control | 091012_CTL-C Rab GDP dissc   |
| msc | Control | Control | 091012_CTL-C Superoxide di:  |
| msc | Control | Control | 091012_CTL-C Phosphatidyle   |
| msc | Control | Control | 091012_CTL-C Apolipoprotei   |
| msc | Control | Control | 091012_CTL-C Keratin, type I |
| msc | Control | Control | 091012_CTL-C Plasminogen :   |
| msc | Control | Control | 091012_CTL-C Protein Col8a:  |
| msc | Control | Control | 091012_CTL-C LIM and SH3 c   |
| msc | Control | Control | 091012_CTL-C Calreticulin O: |
| msc | Control | Control | 091012_CTL-C Cathepsin L1 C  |
| msc | Control | Control | 091012_CTL-C WD repeat-co    |
| msc | Control | Control | 091012_CTL-C Keratin, type I |
| msc | Control | Control | 091012_CTL-C Protein Dkk3 C  |
| msc | Control | Control | 091012_CTL-C Uncharacteriz   |
| msc | Control | Control | 091012_CTL-C Keratin, type I |
| msc | Control | Control | 091012_CTL-C 14-3-3 proteir  |
| msc | Control | Control | 091012_CTL-C Keratin, type I |
| msc | Control | Control | 091012_CTL-C EGF-containin   |
| msc | Control | Control | 091012_CTL-C Transcobalam    |
| msc | Control | Control | 091012_CTL-C Procollagen, t  |

|     |         |         |                                    |
|-----|---------|---------|------------------------------------|
| msc | Control | Control | 091012_CTL-C Ribonuclease          |
| msc | Control | Control | 091012_CTL-C Protein Krt76         |
| msc | Control | Control | 091012_CTL-C Uncharacteriz         |
| msc | Control | Control | 091012_CTL-C Procollagen-ly        |
| msc | Control | Control | 091012_CTL-C Coiled-coil do        |
| msc | Control | Control | 091012_CTL-C Microtubule- $\alpha$ |
| msc | Control | Control | 091012_CTL-C Ubiquitin-like        |
| msc | Control | Control | 091012_CTL-C Tropomyosin           |
| msc | Control | Control | 091012_CTL-C Alpha-2-macrog        |
| msc | Control | Control | 091012_CTL-C Protein Col6a1        |
| msc | Control | Control | 091012_CTL-C Neurofilamen          |
| msc | Control | Control | 091012_CTL-C Uncharacteriz         |
| msc | Control | Control | 091012_CTL-C Serotransferri        |
| msc | Control | Control | 091012_CTL-C Nucleoside di         |
| msc | Control | Control | 091012_CTL-C Procollagen C         |
| msc | Control | Control | 091012_CTL-C Nidogen-1 OS          |
| msc | Control | Control | 091012_CTL-C Thy-1 membr           |
| msc | Control | Control | 091012_CTL-C Heat shock co         |
| msc | Control | Control | 091012_CTL-C Peptidyl-proly        |
| msc | Control | Control | 091012_CTL-C Uncharacteriz         |
| msc | Control | Control | 091012_CTL-C Gremlin-1 OS          |
| msc | Control | Control | 091012_CTL-C Destrin OS=R $\alpha$ |
| msc | Control | Control | 091012_CTL-C Protein Thbs2         |
| msc | Control | Control | 091012_CTL-C Thymosin bet          |
| msc | Control | Control | 091012_CTL-C Ab2-162 OS=F          |
| msc | Control | Control | 091012_CTL-C Histone H2B t         |
| msc | Control | Control | 091012_CTL-C Serine protea         |
| msc | Control | Control | 091012_CTL-C Elongation fac        |
| msc | Control | Control | 091012_CTL-C Nucleobindin          |
| msc | Control | Control | 091012_CTL-C Uncharacteriz         |
| msc | Control | Control | 091012_CTL-C Adenylate kin         |
| msc | Control | Control | 091012_CTL-C Ester hydrolas        |
| msc | Control | Control | 091012_CTL-C Uncharacteriz         |
| msc | Control | Control | 091012_CTL-C Placenta grow         |
| msc | Control | Control | 091012_CTL-C RCG32401, isc         |
| msc | Control | Control | 091012_CTL-C Hemoglobin s          |
| msc | Control | Control | 091012_CTL-C Transforming          |
| msc | Control | Control | 091012_CTL-C Keratin, type I       |
| msc | Control | Control | 091012_CTL-C Uncharacteriz         |
| msc | Control | Control | 091012_CTL-C Protein Ccbe1         |
| msc | Control | Control | 091012_CTL-C C-type lectin c       |
| msc | Control | Control | 091012_CTL-C Calsyntenin-1         |
| msc | Control | Control | 091012_CTL-C Procollagen, t        |
| msc | Control | Control | 091012_CTL-C Type II keratir       |
| msc | Control | Control | 091012_CTL-C Dihydropyrim          |
| msc | Control | Control | 091012_CTL-C Collagen alph         |
| msc | Control | Control | 091012_CTL-C Sushi-repeat-c        |
| msc | Control | Control | 091012_CTL-C Keratin, type I       |
| msc | Control | Control | 091012_CTL-C Peptidyl-proly        |
| msc | Control | Control | 091012_CTL-C Follistatin-rela      |
| msc | Control | Control | 091012_CTL-C Collagen alph         |

|     |         |         |                               |
|-----|---------|---------|-------------------------------|
| msc | Control | Control | 091012_CTL-C Collagen alpha   |
| msc | Control | Control | 091012_CTL-C 14-3-3 proteir   |
| msc | Control | Control | 091012_CTL-C Myelin-associ    |
| msc | Control | Control | 091012_CTL-C Ubiquitin carb   |
| msc | Control | Control | 091012_CTL-C NAD(P)H dehy     |
| msc | Control | Control | 091012_CTL-C Protein Dag1     |
| msc | Control | Control | 091012_CTL-C Heat shock pr    |
| msc | Control | Control | 091012_CTL-C 14-3-3 proteir   |
| msc | Control | Control | 091012_CTL-C 72 kDa type IV   |
| msc | Control | Control | 091012_CTL-C Tubulin alpha-   |
| msc | Control | Control | 091012_CTL-C Keratin, type I  |
| msc | Control | Control | 091012_CTL-C Complement C     |
| msc | Control | Control | 091012_CTL-C Rho GDP-diss     |
| msc | Control | Control | 091012_CTL-C Vitamin D-bin    |
| msc | Control | Control | 091012_CTL-C Protein Ncam     |
| msc | Control | Control | 091012_CTL-C Protein LOC10    |
| msc | Control | Control | 091012_CTL-C Inhibin beta A   |
| msc | Control | Control | 091012_CTL-C Serine (Or cys   |
| msc | Control | Control | 091012_CTL-C Cysteine and g   |
| msc | Control | Control | 091012_CTL-C Keratin, type I  |
| msc | Control | Control | 091012_CTL-C 78 kDa glucos    |
| msc | Control | Control | 091012_CTL-C Peroxiredoxin    |
| msc | Control | Control | 091012_CTL-C HtrA serine pe   |
| msc | Control | Control | 091012_CTL-C Alpha-actinin-   |
| msc | Control | Control | 091012_CTL-C Protein Pxdn     |
| msc | Control | Control | 091012_CTL-C Uncharacteriz    |
| msc | Control | Control | 091012_CTL-C Isoform TGF-b    |
| msc | Control | Control | 091012_CTL-C Clusterin OS=I   |
| msc | Control | Control | 091012_CTL-C Protein Dsp O    |
| msc | Control | Control | 091012_CTL-C Isoform 2 of T   |
| msc | Control | Control | 091012_CTL-C Tubulin beta-    |
| msc | Control | Control | 091012_CTL-C Peripherin OS    |
| msc | Control | Control | 091012_CTL-C Calumenin OS     |
| msc | Control | Control | 091012_CTL-C Sulfated glyco   |
| msc | Control | Control | 091012_CTL-C C1qtnf3 prote    |
| msc | Control | Control | 091012_CTL-C Fibulin 2, isofc |
| msc | Control | Control | 091012_CTL-C Dipeptidyl pep   |
| msc | Control | Control | 091012_CTL-C Uncharacteriz    |
| msc | Control | Control | 091012_CTL-C Alpha-actinin-   |
| msc | Control | Control | 091012_CTL-C Neurofilamen     |
| msc | Control | Control | 091012_CTL-C L-lactate dehy   |
| msc | Control | Control | 091012_CTL-C Secernin-1 OS    |
| msc | Control | Control | 091012_CTL-C Insulin-like gro |
| msc | Control | Control | 091012_CTL-C Annexin A2 O'    |
| msc | Control | Control | 091012_CTL-C Serum albumi     |
| msc | Control | Control | 091012_CTL-C Phosphoglyce     |
| msc | Control | Control | 091012_CTL-C Tropomyosin      |
| msc | Control | Control | 091012_CTL-C Cofilin-1 OS=F   |
| msc | Control | Control | 091012_CTL-C Osteopontin C    |
| msc | Control | Control | 091012_CTL-C Uncharacteriz    |
| msc | Control | Control | 091012_CTL-C Peptidyl-proly   |

|     |         |         |                                 |
|-----|---------|---------|---------------------------------|
| msc | Control | Control | 091012_CTL-C Protein Col5a1     |
| msc | Control | Control | 091012_CTL-C Actin, cytoplasmic |
| msc | Control | Control | 091012_CTL-C Legumain OS=       |
| msc | Control | Control | 091012_CTL-C Protein Col4a1     |
| msc | Control | Control | 091012_CTL-C Protein Lamc1      |
| msc | Control | Control | 091012_CTL-C Keratin, type I    |
| msc | Control | Control | 091012_CTL-C Gamma-enolase      |
| msc | Control | Control | 091012_CTL-C Plastin 3 (T-isc   |
| msc | Control | Control | 091012_CTL-C Isoform 3 of T     |
| msc | Control | Control | 091012_CTL-C Isoform V3 of      |
| msc | SCI     | SCI     | 091012_L-02 Inter-alpha try     |
| msc | SCI     | SCI     | 091012_L-02 Uncharacteriz       |
| msc | SCI     | SCI     | 091012_L-02 Alpha-2-HS-gl       |
| msc | SCI     | SCI     | 091012_L-02 Microtubule-a       |
| msc | SCI     | SCI     | 091012_L-02 Adenosylhom         |
| msc | SCI     | SCI     | 091012_L-02 Ester hydrolas      |
| msc | SCI     | SCI     | 091012_L-02 Myelin-associ       |
| msc | SCI     | SCI     | 091012_L-02 Protein Sh3bg       |
| msc | SCI     | SCI     | 091012_L-02 Protein Ank2 (      |
| msc | SCI     | SCI     | 091012_L-02 Aspartate ami       |
| msc | SCI     | SCI     | 091012_L-02 Isoform 2 of P      |
| msc | SCI     | SCI     | 091012_L-02 Peroxiredoxin       |
| msc | SCI     | SCI     | 091012_L-02 L-lactate dehy      |
| msc | SCI     | SCI     | 091012_L-02 Uncharacteriz       |
| msc | SCI     | SCI     | 091012_L-02 Calreticulin O      |
| msc | SCI     | SCI     | 091012_L-02 Protein Col6a1      |
| msc | SCI     | SCI     | 091012_L-02 4-trimethylar       |
| msc | SCI     | SCI     | 091012_L-02 Protein LOC10       |
| msc | SCI     | SCI     | 091012_L-02 Thioredoxin-li      |
| msc | SCI     | SCI     | 091012_L-02 WD repeat-co        |
| msc | SCI     | SCI     | 091012_L-02 Calretinin OS=      |
| msc | SCI     | SCI     | 091012_L-02 Protein Sema1       |
| msc | SCI     | SCI     | 091012_L-02 Phosphoglyce        |
| msc | SCI     | SCI     | 091012_L-02 Glyceraldehyc       |
| msc | SCI     | SCI     | 091012_L-02 Ig gamma-2A         |
| msc | SCI     | SCI     | 091012_L-02 Keratin, type I     |
| msc | SCI     | SCI     | 091012_L-02 Hydroxyacyl g       |
| msc | SCI     | SCI     | 091012_L-02 Protein Serpir      |
| msc | SCI     | SCI     | 091012_L-02 Aminoacylase        |
| msc | SCI     | SCI     | 091012_L-02 Glial fibrillary    |
| msc | SCI     | SCI     | 091012_L-02 Protein AMBP        |
| msc | SCI     | SCI     | 091012_L-02 Keratin, type I     |
| msc | SCI     | SCI     | 091012_L-02 Neuronal cell       |
| msc | SCI     | SCI     | 091012_L-02 Peripherin OS       |
| msc | SCI     | SCI     | 091012_L-02 Alpha-1-macroglob   |
| msc | SCI     | SCI     | 091012_L-02 Latexin OS=Ra       |
| msc | SCI     | SCI     | 091012_L-02 Ectonucleotid       |
| msc | SCI     | SCI     | 091012_L-02 Glutathione S-      |
| msc | SCI     | SCI     | 091012_L-02 Protein SET O       |
| msc | SCI     | SCI     | 091012_L-02 Neurofilamen        |
| msc | SCI     | SCI     | 091012_L-02 Plectin (Fragr      |

|     |     |     |             |                 |
|-----|-----|-----|-------------|-----------------|
| msc | SCI | SCI | 091012_L-02 | Myosin-9 OS=    |
| msc | SCI | SCI | 091012_L-02 | 78 kDa glucos   |
| msc | SCI | SCI | 091012_L-02 | Glucose-6-phc   |
| msc | SCI | SCI | 091012_L-02 | Guanine dean    |
| msc | SCI | SCI | 091012_L-02 | Protein Ncam    |
| msc | SCI | SCI | 091012_L-02 | Isoform 2 of C  |
| msc | SCI | SCI | 091012_L-02 | F-actin-cappir  |
| msc | SCI | SCI | 091012_L-02 | Uncharacteriz   |
| msc | SCI | SCI | 091012_L-02 | Neurofilamen    |
| msc | SCI | SCI | 091012_L-02 | Isoform Gamr    |
| msc | SCI | SCI | 091012_L-02 | 14-3-3 proteir  |
| msc | SCI | SCI | 091012_L-02 | Glutathione S-  |
| msc | SCI | SCI | 091012_L-02 | Complement c    |
| msc | SCI | SCI | 091012_L-02 | Creatine kinas  |
| msc | SCI | SCI | 091012_L-02 | Tubulin alpha-  |
| msc | SCI | SCI | 091012_L-02 | Gamma-enola     |
| msc | SCI | SCI | 091012_L-02 | Isoform Crk-I   |
| msc | SCI | SCI | 091012_L-02 | Hexokinase-1    |
| msc | SCI | SCI | 091012_L-02 | Protein Txndc   |
| msc | SCI | SCI | 091012_L-02 | Neuromodulir    |
| msc | SCI | SCI | 091012_L-02 | Myosin light p  |
| msc | SCI | SCI | 091012_L-02 | Vitamin D-bin   |
| msc | SCI | SCI | 091012_L-02 | Hemoglobin s    |
| msc | SCI | SCI | 091012_L-02 | Adenylate kin   |
| msc | SCI | SCI | 091012_L-02 | Protein Itih4 C |
| msc | SCI | SCI | 091012_L-02 | Apolipoprotei   |
| msc | SCI | SCI | 091012_L-02 | Calpain small   |
| msc | SCI | SCI | 091012_L-02 | Alpha-1-inhibi  |
| msc | SCI | SCI | 091012_L-02 | Annexin A5 O'   |
| msc | SCI | SCI | 091012_L-02 | Fibrinogen be   |
| msc | SCI | SCI | 091012_L-02 | Protein DJ-1 C  |
| msc | SCI | SCI | 091012_L-02 | Fructose-bispl  |
| msc | SCI | SCI | 091012_L-02 | Serotransferri  |
| msc | SCI | SCI | 091012_L-02 | Complement f    |
| msc | SCI | SCI | 091012_L-02 | Rab GDP dissc   |
| msc | SCI | SCI | 091012_L-02 | Synaptosomal    |
| msc | SCI | SCI | 091012_L-02 | Latent transfo  |
| msc | SCI | SCI | 091012_L-02 | Isoform 3 of N  |
| msc | SCI | SCI | 091012_L-02 | Procollagen, t  |
| msc | SCI | SCI | 091012_L-02 | Glutathione S-  |
| msc | SCI | SCI | 091012_L-02 | Acyl-CoA-bind   |
| msc | SCI | SCI | 091012_L-02 | Isoform 2 of S  |
| msc | SCI | SCI | 091012_L-02 | Fibrinogen alp  |
| msc | SCI | SCI | 091012_L-02 | Acylphosphati   |
| msc | SCI | SCI | 091012_L-02 | 6-phosphoglu    |
| msc | SCI | SCI | 091012_L-02 | Granulins OS=   |
| msc | SCI | SCI | 091012_L-02 | Cysteine and g  |
| msc | SCI | SCI | 091012_L-02 | Transcriptiona  |
| msc | SCI | SCI | 091012_L-02 | Dihydropyrim    |
| msc | SCI | SCI | 091012_L-02 | Rab GDP dissc   |
| msc | SCI | SCI | 091012_L-02 | Keratin, type I |

|     |     |     |             |                 |
|-----|-----|-----|-------------|-----------------|
| msc | SCI | SCI | 091012_L-02 | Hyaluronan ar   |
| msc | SCI | SCI | 091012_L-02 | 2',3'-cyclic-nu |
| msc | SCI | SCI | 091012_L-02 | Transgelin OS   |
| msc | SCI | SCI | 091012_L-02 | Triosephosphi   |
| msc | SCI | SCI | 091012_L-02 | Uncharacteriz   |
| msc | SCI | SCI | 091012_L-02 | Protein Itih2 C |
| msc | SCI | SCI | 091012_L-02 | Uncharacteriz   |
| msc | SCI | SCI | 091012_L-02 | Tubulin beta-!  |
| msc | SCI | SCI | 091012_L-02 | Uncharacteriz   |
| msc | SCI | SCI | 091012_L-02 | Oligodendroc    |
| msc | SCI | SCI | 091012_L-02 | Heat shock pr   |
| msc | SCI | SCI | 091012_L-02 | Ig gamma-1 cl   |
| msc | SCI | SCI | 091012_L-02 | Uncharacteriz   |
| msc | SCI | SCI | 091012_L-02 | Transaldolase   |
| msc | SCI | SCI | 091012_L-02 | Glutamate de    |
| msc | SCI | SCI | 091012_L-02 | Fascin OS= Rat  |
| msc | SCI | SCI | 091012_L-02 | Elongation fac  |
| msc | SCI | SCI | 091012_L-02 | Elongation fac  |
| msc | SCI | SCI | 091012_L-02 | Isoform B of A  |
| msc | SCI | SCI | 091012_L-02 | Collagen alphi  |
| msc | SCI | SCI | 091012_L-02 | Myelin protec   |
| msc | SCI | SCI | 091012_L-02 | Tenascin-R OS   |
| msc | SCI | SCI | 091012_L-02 | Rabphilin-3A (  |
| msc | SCI | SCI | 091012_L-02 | Osteoglycin (F  |
| msc | SCI | SCI | 091012_L-02 | Glyoxalase do   |
| msc | SCI | SCI | 091012_L-02 | Vesicle-fusing  |
| msc | SCI | SCI | 091012_L-02 | Fatty acid-bin  |
| msc | SCI | SCI | 091012_L-02 | Kininogen 1 O   |
| msc | SCI | SCI | 091012_L-02 | Keratin, type I |
| msc | SCI | SCI | 091012_L-02 | Serine protea:  |
| msc | SCI | SCI | 091012_L-02 | Isoform Glt-1/  |
| msc | SCI | SCI | 091012_L-02 | Cathepsin D C   |
| msc | SCI | SCI | 091012_L-02 | Glutathione S-  |
| msc | SCI | SCI | 091012_L-02 | Aggrecan core   |
| msc | SCI | SCI | 091012_L-02 | Spectrin alpha  |
| msc | SCI | SCI | 091012_L-02 | Ubiquitin carb  |
| msc | SCI | SCI | 091012_L-02 | Vimentin OS=    |
| msc | SCI | SCI | 091012_L-02 | Protein Col4a:  |
| msc | SCI | SCI | 091012_L-02 | Complement (    |
| msc | SCI | SCI | 091012_L-02 | Lysozyme C-1    |
| msc | SCI | SCI | 091012_L-02 | Heat shock co   |
| msc | SCI | SCI | 091012_L-02 | Isoform 2 of M  |
| msc | SCI | SCI | 091012_L-02 | Histone H3 OS   |
| msc | SCI | SCI | 091012_L-02 | Complement (    |
| msc | SCI | SCI | 091012_L-02 | Alpha-centrac   |
| msc | SCI | SCI | 091012_L-02 | Actin, cytopla: |
| msc | SCI | SCI | 091012_L-02 | Histone H4 OS   |
| msc | SCI | SCI | 091012_L-02 | Galectin-1 OS:  |
| msc | SCI | SCI | 091012_L-02 | Syntaxin-1B O   |
| msc | SCI | SCI | 091012_L-02 | Protein LOC10   |
| msc | SCI | SCI | 091012_L-02 | Purine nucleo   |



|     |     |     |             |                 |
|-----|-----|-----|-------------|-----------------|
| msc | SCI | SCI | 091012_L-02 | Histone H2B t   |
| msc | SCI | SCI | 091012_L-02 | Filamin alpha   |
| msc | SCI | SCI | 091012_L-02 | Keratin, type I |
| msc | SCI | SCI | 091012_L-02 | Uncharacteriz   |
| msc | SCI | SCI | 091012_L-02 | CD9 antigen C   |
| msc | SCI | SCI | 091012_L-02 | Annexin A2 O'   |
| msc | SCI | SCI | 091012_L-02 | Protein Cfh O'  |
| msc | SCI | SCI | 091012_L-02 | Annexin A1 O'   |
| msc | SCI | SCI | 091012_L-02 | Protein Lamc1   |
| msc | SCI | SCI | 091012_L-02 | Actin, aortic s |
| msc | SCI | SCI | 091012_L-02 | Uncharacteriz   |
| msc | SCI | SCI | 091012_L-02 | Transgelin-3 C  |
| msc | SCI | SCI | 091012_L-02 | Rho GDP-dissc   |
| msc | SCI | SCI | 091012_L-02 | Cofilin-1 OS=F  |
| msc | SCI | SCI | 091012_L-02 | Neurotrimin C   |
| msc | SCI | SCI | 091012_L-02 | Alpha 4 type \  |
| msc | SCI | SCI | 091012_L-02 | Afamin OS=Ra    |
| msc | SCI | SCI | 091012_L-02 | Pyruvate kina:  |
| msc | SCI | SCI | 091012_L-02 | Apolipoprotei   |
| msc | SCI | SCI | 091012_L-02 | 14-3-3 proteir  |
| msc | SCI | SCI | 091012_L-02 | Dihydropterid   |
| msc | SCI | SCI | 091012_L-02 | Moesin (Fragr   |
| msc | SCI | SCI | 091012_L-02 | Procollagen, t  |
| msc | SCI | SCI | 091012_L-02 | Isoform Tau-B   |
| msc | SCI | SCI | 091012_L-02 | Protein Psat1   |
| msc | SCI | SCI | 091012_L-02 | Coiled-coil do  |
| msc | SCI | SCI | 091012_L-02 | Serum albumi    |
| msc | SCI | SCI | 091012_L-02 | Cell cycle exit |
| msc | SCI | SCI | 091012_L-02 | Carbonic anhy   |
| msc | SCI | SCI | 091012_L-02 | Protein Ube2I   |
| msc | SCI | SCI | 091012_L-02 | Protein Col6a:  |
| msc | SCI | SCI | 091012_L-02 | Isoform 2 of C  |
| msc | SCI | SCI | 091012_L-02 | Annexin (Frag   |
| msc | SCI | SCI | 091012_L-02 | Myoglobin OS    |
| msc | SCI | SCI | 091012_L-02 | NADP-depend     |
| msc | SCI | SCI | 091012_L-02 | Peroxioredoxin  |
| msc | SCI | SCI | 091012_L-02 | Lactoylglutath  |
| msc | SCI | SCI | 091012_L-02 | Brevican core   |
| msc | SCI | SCI | 091012_L-02 | Protein disulfi |
| msc | SCI | SCI | 091012_L-02 | Isoform M2 of   |
| msc | SCI | SCI | 091012_L-02 | Serine protea:  |
| msc | SCI | SCI | 091012_L-02 | Dihydropyrim    |
| msc | SCI | SCI | 091012_L-02 | Polyubiquitin-  |
| msc | SCI | SCI | 091012_L-02 | ATP synthase    |
| msc | SCI | SCI | 091012_L-02 | Uncharacteriz   |
| msc | SCI | SCI | 091012_L-02 | Carboxylester   |
| msc | SCI | SCI | 091012_L-02 | Ferritin OS=Ra  |
| msc | SCI | SCI | 091012_L-02 | Transketolase   |
| msc | SCI | SCI | 091012_L-02 | Transitional ei |
| msc | SCI | SCI | 091012_L-02 | Uncharacteriz   |
| msc | SCI | SCI | 091012_L-02 | Dihydropyrim    |

|     |     |     |             |                       |
|-----|-----|-----|-------------|-----------------------|
| msc | SCI | SCI | 091012_L-02 | Cathepsin B O         |
| msc | SCI | SCI | 091012_L-02 | Peptidyl-proly        |
| msc | SCI | SCI | 091012_L-02 | Ribonuclease          |
| msc | SCI | SCI | 091012_L-02 | Thioredoxin C         |
| msc | SCI | SCI | 091012_L-02 | Amphiphysin I         |
| msc | SCI | SCI | 091012_L-02 | Protein Hepac         |
| msc | SCI | SCI | 091012_L-02 | Keratin, type I       |
| msc | SCI | SCI | 091012_L-02 | Fibulin 1 (Prec       |
| msc | SCI | SCI | 091012_L-02 | Uncharacteriz         |
| msc | SCI | SCI | 091012_L-02 | Sodium/potas          |
| msc | SCI | SCI | 091012_L-02 | Hyaluronan ar         |
| msc | SCI | SCI | 091012_L-02 | Hemoglobin s          |
| msc | SCI | SCI | 091012_L-02 | Creatine kinas        |
| msc | SCI | SCI | 091012_L-02 | Phosphoglyce          |
| msc | SCI | SCI | 091012_L-02 | L-lactate dehy        |
| msc | SCI | SCI | 091012_L-02 | Protein Zc3h1         |
| msc | SCI | SCI | 091012_L-02 | Fetuin-B OS=F         |
| msc | SCI | SCI | 091012_L-02 | Malate dehyd          |
| msc | SCI | SCI | 091012_L-02 | Protein Serpir        |
| msc | SCI | SCI | 091012_L-02 | Phosphoglyce          |
| msc | SCI | SCI | 091012_L-02 | Legumain OS=          |
| msc | SCI | SCI | 091012_L-02 | Protein Col8a1        |
| msc | SCI | SCI | 091012_L-02 | Serine proteas        |
| msc | SCI | SCI | 091012_L-02 | Keratin, type I       |
| msc | SCI | SCI | 091012_L-02 | Keratin, type I       |
| msc | SCI | SCI | 091012_L-02 | Protein Npep1         |
| msc | SCI | SCI | 091012_L-02 | Protein IMPA1         |
| msc | SCI | SCI | 091012_L-02 | Tropomyosin           |
| msc | SCI | SCI | 091012_L-02 | Neural cell ad        |
| msc | SCI | SCI | 091012_L-02 | Xaa-Pro dipep         |
| msc | SCI | SCI | 091012_L-02 | Tubulin beta-2        |
| msc | SCI | SCI | 091012_L-02 | Lumican OS=F          |
| msc | SCI | SCI | 091012_L-02 | ATP synthase          |
| msc | SCI | SCI | 091012_L-02 | Myristoylated         |
| msc | SCI | SCI | 091012_L-02 | Uncharacteriz         |
| msc | SCI | SCI | 091012_L-02 | Cathepsin L1 (        |
| msc | SCI | SCI | 091012_L-02 | Glycogen pho          |
| msc | SCI | SCI | 091012_L-02 | Vinculin OS=R         |
| msc | SCI | SCI | 091012_L-02 | Lymphocyte c          |
| msc | SCI | SCI | 091012_L-02 | Copper transp         |
| msc | SCI | SCI | 091012_L-02 | Isoform 2 of T        |
| msc | SCI | SCI | 091012_L-02 | Phosphogluco          |
| msc | SCI | SCI | 091012_L-02 | Sodium/potas          |
| msc | SCI | SCI | 091012_L-02 | Malate dehyd          |
| msc | SCI | SCI | 091012_L-02 | Keratin, type I       |
| msc | SCI | SCI | 091012_L-02 | Protein S100-l        |
| msc | SCI | SCI | 091012_L-02 | Cytosolic non-        |
| msc | SCI | SCI | 091012_L-02 | Tropomyosin           |
| msc | SCI | SCI | 091012_L-02 | Microtubule- $\alpha$ |
| msc | SCI | SCI | 091012_L-02 | Profilin-2 OS=        |
| msc | SCI | SCI | 091012_L-02 | Murinoglobuli         |

|     |     |     |             |                       |
|-----|-----|-----|-------------|-----------------------|
| msc | SCI | SCI | 091012_L-02 | Peroxiredoxin         |
| msc | SCI | SCI | 091012_L-02 | Protein Krt86         |
| msc | SCI | SCI | 091012_L-02 | Glutamine syr         |
| msc | SCI | SCI | 091012_L-02 | 14-3-3 proteir        |
| msc | SCI | SCI | 091012_L-02 | Nidogen-1 OS          |
| msc | SCI | SCI | 091012_L-02 | Alpha-actinin-        |
| msc | SCI | SCI | 091012_L-02 | Alpha-2-macro         |
| msc | SCI | SCI | 091012_L-02 | Dihydrolipoyl         |
| msc | SCI | SCI | 091012_L-02 | Apolipoprotei         |
| msc | SCI | SCI | 091012_L-02 | Complement C          |
| msc | SCI | SCI | 091012_L-02 | Protein Atp6v         |
| msc | SCI | SCI | 091012_L-02 | Ig gamma-2B           |
| msc | SCI | SCI | 091012_L-02 | Plasminogen C         |
| msc | SCI | SCI | 091012_L-02 | Alpha-actinin-        |
| msc | SCI | SCI | 091012_L-02 | Fibronectin O         |
| msc | SCI | SCI | 091012_L-02 | Protein Col5a1        |
| msc | SCI | SCI | 091012_L-02 | Heme binding          |
| msc | SCI | SCI | 091012_L-02 | Uncharacteriz         |
| msc | SCI | SCI | 091012_L-02 | Ab2-162 OS=F          |
| msc | SCI | SCI | 091012_L-02 | Phosphorylase         |
| msc | SCI | SCI | 091012_L-02 | Protein disulfi       |
| msc | SCI | SCI | 091012_L-02 | Carbonic anhy         |
| msc | SCI | SCI | 091012_L-02 | Uncharacteriz         |
| msc | SCI | SCI | 091012_L-02 | Microtubule- $\alpha$ |
| msc | SCI | SCI | 091012_L-02 | Transgelin-2 C        |
| msc | SCI | SCI | 091012_L-02 | Contactin-1 O         |
| msc | SCI | SCI | 091012_L-02 | Transthyretin         |
| msc | SCI | SCI | 091012_L-02 | Protein Dsp O         |
| msc | SCI | SCI | 091012_L-02 | Aconitate hyd         |
| msc | SCI | SCI | 091012_L-02 | Sodium/potas          |
| msc | SCI | SCI | 091012_L-02 | Inter-alpha-tr        |
| msc | SCI | SCI | 091012_L-02 | Complexin-1 C         |
| msc | SCI | SCI | 091012_L-02 | Acylphosphat          |
| msc | SCI | SCI | 091012_L-02 | CD59 glycopro         |
| msc | SCI | SCI | 091012_L-02 | Chaperonin co         |
| msc | SCI | SCI | 091012_L-02 | Epididymal se         |
| msc | SCI | SCI | 091012_L-02 | Protein RGD1!         |
| msc | SCI | SCI | 091012_L-02 | Plasminogen $\alpha$  |
| msc | SCI | SCI | 091012_L-02 | Isoform 3 of T        |
| msc | SCI | SCI | 091012_L-02 | Hemoglobin s          |
| msc | SCI | SCI | 091012_L-02 | Protein S100- $\beta$ |
| msc | SCI | SCI | 091012_L-02 | Neurocan cor          |
| msc | SCI | SCI | 091012_L-02 | Plastin 3 (T-isc      |
| msc | SCI | SCI | 091012_L-02 | Fibulin 2, isofc      |
| msc | SCI | SCI | 091012_L-02 | Calcium/calmo         |
| msc | SCI | SCI | 091012_L-02 | Galectin-3 OS         |
| msc | SCI | SCI | 091012_L-02 | Cell adhesion         |
| msc | SCI | SCI | 091012_L-02 | Isoform V3 of         |
| msc | SCI | SCI | 091012_L-02 | 60S acidic ribc       |
| msc | SCI | SCI | 091012_L-02 | C-reactive pro        |
| msc | SCI | SCI | 091012_L-02 | 14-3-3 proteir        |

|     |     |     |             |                  |
|-----|-----|-----|-------------|------------------|
| msc | SCI | SCI | 091012_L-02 | Protein S100a    |
| msc | SCI | SCI | 091012_L-02 | Destrin OS=Ra    |
| msc | SCI | SCI | 091012_L-02 | Hemopexin O      |
| msc | SCI | SCI | 091012_L-02 | Proteasome s     |
| msc | SCI | SCI | 091012_L-02 | Tubulin polyr    |
| msc | SCI | SCI | 091012_L-02 | Aldose reduct    |
| msc | SCI | SCI | 091012_L-02 | 14-3-3 proteir   |
| msc | SCI | SCI | 091012_L-02 | Microtubule-a    |
| msc | SCI | SCI | 091012_L-02 | Fatty acid-bin   |
| msc | SCI | SCI | 091012_L-02 | Ig lambda-2 cl   |
| msc | SCI | SCI | 091012_L-02 | Macrophage-c     |
| msc | SCI | SCI | 091012_L-02 | Macrophage r     |
| msc | SCI | SCI | 091012_L-02 | Isoform IB of :  |
| msc | SCI | SCI | 091012_L-02 | Alpha-interne    |
| msc | SCI | SCI | 091012_L-02 | Protein S100-    |
| msc | SCI | SCI | 091012_L-02 | Glycerol-3-ph    |
| msc | SCI | SCI | 091012_L-02 | Beta-enolase :   |
| msc | SCI | SCI | 091012_L-02 | Translationall   |
| msc | SCI | SCI | 091012_L-02 | Gamma-synuc      |
| msc | SCI | SCI | 091012_L-02 | Reticulon-4 O    |
| msc | SCI | SCI | 091012_L-02 | Protein Lamb:    |
| msc | SCI | SCI | 091012_L-02 | 6-phosphoglu     |
| msc | SCI | SCI | 091012_L-02 | Profilin-1 OS=   |
| msc | SCI | SCI | 091012_L-02 | Alpha globin C   |
| msc | SCI | SCI | 091012_L-02 | Superoxide di    |
| msc | SCI | SCI | 091012_L-02 | Prelamin-A/C     |
| msc | SCI | SCI | 091012_L-02 | Inositol mono    |
| msc | SCI | SCI | 091012_L-02 | Adenylyl cycla   |
| msc | SCI | SCI | 091012_L-02 | 14-3-3 proteir   |
| msc | SCI | SCI | 091012_L-02 | Adenine phos     |
| msc | SCI | SCI | 091012_L-02 | Biliverdin redt  |
| msc | SCI | SCI | 091012_L-02 | Kallikrein 6, is |
| msc | SCI | SCI | 091012_L-02 | Alcohol dehy     |
| msc | SCI | SCI | 091012_L-02 | Chloride intra   |
| msc | SCI | SCI | 091012_L-02 | Ubiquitin-like   |
| msc | SCI | SCI | 091012_L-02 | Kinesin-1 heav   |
| msc | SCI | SCI | 091012_L-02 | Alpha-1-antip    |
| msc | SCI | SCI | 091012_L-02 | Metalloprotei    |
| msc | SCI | SCI | 091012_L-02 | Protein Rrbp1    |
| msc | SCI | SCI | 091012_L-02 | CARG-binding     |
| msc | SCI | SCI | 091012_L-02 | Fructose-bispl   |
| msc | SCI | SCI | 091012_L-02 | Isoform 1 of C   |
| msc | SCI | SCI | 091012_L-02 | Nucleoside dij   |
| msc | SCI | SCI | 091012_L-02 | Secernin-1 OS    |
| msc | SCI | SCI | 091012_L-02 | Tubulin beta-:   |
| msc | SCI | SCI | 091012_L-02 | Ribonuclease     |
| msc | SCI | SCI | 091012_L-02 | Phospholysine    |
| msc | SCI | SCI | 091012_L-02 | Protein LOC67    |
| msc | SCI | SCI | 091012_L-02 | Prostaglandin    |
| msc | SCI | SCI | 091012_L-02 | Cystatin-C OS:   |
| msc | SCI | SCI | 091012_L-02 | Clathrin heavy   |

|     |     |     |             |                 |
|-----|-----|-----|-------------|-----------------|
| msc | SCI | SCI | 091012_L-02 | T-kininogen 2   |
| msc | SCI | SCI | 091012_L-02 | Protein CutA (  |
| msc | SCI | SCI | 091012_L-02 | Protein Hbb-b   |
| msc | SCI | SCI | 091012_L-02 | Protein Hspg2   |
| msc | SCI | SCI | 091012_L-02 | Proteasome s    |
| msc | SCI | SCI | 091012_L-02 | Serine/threon   |
| msc | SCI | SCI | 091012_L-02 | C-C motif chei  |
| msc | SCI | SCI | 091012_L-02 | Ubiquitin carb  |
| msc | SCI | SCI | 091012_L-02 | Anionic trypsi  |
| msc | SCI | SCI | 091012_L-02 | Alpha-1B-glyc   |
| msc | SCI | SCI | 091012_L-02 | Apolipoprotei   |
| msc | SCI | SCI | 091012_L-02 | Haptoglobin C   |
| msc | SCI | SCI | 091012_L-02 | Dynein light cl |
| msc | SCI | SCI | 091012_L-02 | Tubulin beta-3  |
| msc | SCI | SCI | 091012_L-02 | Neurofilamen    |
| msc | SCI | SCI | 091012_L-02 | 60S acidic ribc |
| msc | SCI | SCI | 091012_L-02 | Isoform 2 of A  |
| msc | SCI | SCI | 091012_L-02 | Histone H2A t   |
| msc | SCI | SCI | 091012_L-02 | Tubulin alpha-  |
| msc | SCI | SCI | 091012_L-02 | Uncharacteriz   |
| msc | SCI | SCI | 091012_L-02 | NSFL1 cofacto   |
| msc | SCI | SCI | 091012_L-02 | Histidine-rich  |
| msc | SCI | SCI | 091012_L-02 | Monocyte diff   |
| msc | SCI | SCI | 091012_L-02 | Protein Flnc O  |
| msc | SCI | SCI | 091012_L-02 | Protein LOC1C   |
| msc | SCI | SCI | 091012_L-02 | Cytochrome c    |
| msc | SCI | SCI | 091012_L-02 | D-dopachrom     |
| msc | SCI | SCI | 091012_L-02 | Nucleoside dij  |
| msc | SCI | SCI | 091012_L-02 | Ubiquitin thio  |
| msc | SCI | SCI | 091012_L-02 | Carbonic anhy   |
| msc | SCI | SCI | 091012_L-02 | Ig kappa chain  |
| msc | SCI | SCI | 091012_L-02 | Phosphatidyle   |
| msc | SCI | SCI | 091012_L-02 | Acidic leucine  |
| msc | SCI | SCI | 091012_L-02 | Keratin, type I |
| msc | SCI | SCI | 091012_L-02 | V-type proton   |
| msc | SCI | SCI | 091012_L-02 | Alpha-enolase   |
| msc | SCI | SCI | 091012_L-02 | Isoform 2 of L  |
| msc | SCI | SCI | 091012_L-02 | 2,3-bisphosph   |
| msc | SCI | SCI | 091012_L-02 | Calmodulin O'   |
| msc | SCI | SCI | 091012_L-02 | Histidine triad |
| msc | SCI | SCI | 091012_L-02 | Fatty acid-bin  |
| msc | SCI | SCI | 091012_L-02 | Isoform 3 of D  |
| msc | SCI | SCI | 091012_L-02 | Isoaspartyl pe  |
| msc | SCI | SCI | 091012_L-02 | Uncharacteriz   |
| msc | SCI | SCI | 091012_L-02 | Superoxide di   |
| msc | SCI | SCI | 091012_L-02 | Isoform 2 of L  |
| msc | SCI | SCI | 091012_L-02 | Heat shock 70   |
| msc | SCI | SCI | 091012_L-02 | Tubulin alpha-  |
| msc | SCI | SCI | 091012_L-02 | Uncharacteriz   |
| msc | SCI | SCI | 091012_L-02 | Peptidyl-proly  |
| msc | SCI | SCI | 091012_L-02 | Junctional adf  |

|             |     |     |                            |
|-------------|-----|-----|----------------------------|
| msc         | SCI | SCI | 091012_L-02 Thy-1 membr    |
| msc         | SCI | SCI | 091012_L-02 Heat shock pr  |
| msc         | SCI | SCI | 091012_L-02 Peroxiredoxin  |
| msc         | SCI | SCI | 091012_L-02 Sulfated glyco |
| msc         | SCI | SCI | 091012_L-02 Isoform Kidne  |
| msc         | SCI | SCI | 091012_L-02 Branched-cha   |
| msc         | SCI | SCI | 091012_L-02 Beta-2-microg  |
| msc         | SCI | SCI | 091012_L-02 Thymosin bet   |
| msc         | SCI | SCI | 091012_L-02 Isoform 2 of A |
| msc         | SCI | SCI | 091012_L-02 Ubiquitin-con  |
| msc         |     |     |                            |
| END OF FILE |     |     |                            |

uraj Blasko<sup>2</sup>, Jan Rosocha<sup>3</sup>, Timea Spakova<sup>3</sup>, Christophe Lefebvre<sup>1</sup>, Isabelle Fournier<sup>1</sup>, Michel Salz

ot\_ref\_proteome\_112011.fasta

ase

ants?: Yes

1 (Monoisotopic)  
(Monoisotopic)  
C (Carbamidomethyl)  
on M (Oxidation), +42 on n (Acetyl), +80 on Y (Phospho)  
s\_Uniprot\_ref\_proteome\_112011.fasta (unknown version, 35683 entries)

Cs: Peptide Prophet with Delta Mass Correction [+2 and below,+3,+4,+5,+6,+7 and above]  
l2: Peptide Prophet with Delta Mass Correction [+2 and below,+3,+4,+5,+6,+7,+8 and above]  
Peptide Prophet with Delta Mass Correction [+2 and below,+3,+4,+5,+6,+7,+8 and above]

01.1)

1 (Monoisotopic)  
(Monoisotopic)  
C (Carbamidomethyl)  
on n (Glu->pyro-Glu), -17 on n (Ammonia-loss), -17 on n (Gln->pyro-Glu), -1 on c (Amidated), +16 on f  
T database

Cs: Peptide Prophet with Delta Mass Correction [+2 and below,+3,+4 and above]  
l2: Peptide Prophet with Delta Mass Correction [+2 and below,+3,+4 and above]  
Peptide Prophet with Delta Mass Correction [+2 and below,+3,+4 and above]

tions  
affold 4\parameters\unimod.xml

le grouping with binary peptide-protein weights

! peptides minimum

| Protein access Database sou | Protein molec | Protein identi | Exclusive uniq | Exclusive uniq | Total spectru |
|-----------------------------|---------------|----------------|----------------|----------------|---------------|
| sp P58775-2 RAT.fasta       | 32 958,6      | 100,0 %        | 5              | 5              | 5             |
| sp Q5XFX0 T.RAT.fasta       | 22 393,8      | 100,0 %        | 2              | 2              | 3             |
| tr B2RZA9 B2.RAT.fasta      | 17 862,3      | 100,0 %        | 2              | 2              | 2             |
| sp P62815 V.RAT.fasta       | 56 552,3      | 99,9 %         | 0              | 0              | 0             |
| sp Q07936 A.RAT.fasta       | 38 680,2      | 100,0 %        | 3              | 3              | 10            |
| sp O88201 C.RAT.fasta       | 36 387,5      | 100,0 %        | 6              | 6              | 6             |
| tr F1LP57 F1I.RAT.fasta     | 41 102,6      | 92,2 %         | 0              | 0              | 0             |
| tr F1LS57 F1I.RAT.fasta     | 125 961,6     | 100,0 %        | 4              | 4              | 7             |
| sp Q6IG05 K.RAT.fasta       | 59 027,2      | 100,0 %        | 2              | 2              | 10            |
| sp Q00918 L.RAT.fasta       | 186 590,5     | 100,0 %        | 0              | 0              | 0             |
| sp P13697 M.RAT.fasta       | 64 004,3      | 36,9 %         | 0              | 0              | 0             |
| tr Q642B0 Q.RAT.fasta       | 62 563,0      | 97,6 %         | 0              | 0              | 0             |
| sp O35244 P.RAT.fasta       | 24 819,9      | 100,0 %        | 2              | 2              | 2             |
| sp Q6AYC4 C.RAT.fasta       | 38 799,7      | 100,0 %        | 2              | 2              | 2             |
| sp Q5QD51-2.RAT.fasta       | 181 102,3     | 99,8 %         | 0              | 0              | 0             |
| tr D3ZWH5 C.RAT.fasta       | 28 014,0      | 21,1 %         | 0              | 0              | 0             |
| sp P04642 LI.RAT.fasta      | 36 450,8      | 100,0 %        | 4              | 4              | 5             |
| tr D3ZQ25 D.RAT.fasta       | 78 070,0      | 100,0 %        | 4              | 4              | 7             |
| sp P05539 C.RAT.fasta       | 134 572,0     | 100,0 %        | 3              | 3              | 17            |
| tr D4A2G6 D.RAT.fasta       | 129 725,6     | 100,0 %        | 22             | 23             | 78            |
| sp Q6Q0N0 C.RAT.fasta       | 106 259,2     | 100,0 %        | 4              | 4              | 6             |
| sp Q810F4 F.RAT.fasta       | 24 713,9      | 100,0 %        | 2              | 2              | 2             |
| tr Q62669 Q.RAT.fasta       | 16 022,6      | 8,5 %          | 0              | 0              | 0             |
| tr Q3MID6 Q.RAT.fasta       | 37 148,8      | 100,0 %        | 6              | 9              | 16            |
| tr F1MAA7 F.RAT.fasta       | 177 385,1     | 100,0 %        | 1              | 1              | 1             |
| sp P04692-3 RAT.fasta       | 32 682,0      | 98,4 %         | 0              | 0              | 0             |
| sp P02262 H.RAT.fasta       | 14 078,0      | 100,0 %        | 4              | 5              | 12            |
| sp Q9JI03 CC.RAT.fasta      | 183 990,1     | 100,0 %        | 28             | 40             | 102           |
| sp Q2PQA9 k.RAT.fasta       | 109 531,6     | 99,7 %         | 0              | 0              | 0             |
| sp Q6P9V9 T.RAT.fasta       | 50 151,7      | 100,0 %        | 2              | 2              | 2             |
| sp P16086 SPTA2_RAT         | 0,0           | 100,0 %        | 0              | 0              | 0             |
| tr D3ZPA9 D3ZPA9_RAT        | 0,0           | 100,0 %        | 4              | 4              | 8             |
| tr D3ZEI4 D3.RAT.fasta      | 46 530,2      | 100,0 %        | 0              | 0              | 0             |
| sp P63029 T.RAT.fasta       | 19 462,9      | 9,9 %          | 0              | 0              | 0             |
| tr Q5PQU1 Q5PQU1_RAT        | 0,0           | 9,9 %          | 0              | 0              | 0             |
| sp Q99PW7 I.RAT.fasta       | 27 107,4      | 100,0 %        | 4              | 4              | 4             |
| tr F1LS40 F1I.RAT.fasta     | 129 838,5     | 100,0 %        | 100            | 136            | 1002          |
| sp Q5GFD9 II.RAT.fasta      | 35 995,6      | 94,6 %         | 0              | 0              | 0             |
| tr D3ZQN7 D.RAT.fasta       | 202 784,2     | 100,0 %        | 2              | 2              | 2             |
| tr Q5XI38 Q5.RAT.fasta      | 70 124,7      | 99,7 %         | 0              | 0              | 0             |
| tr D4ABR6 D.RAT.fasta       | 0,0           | 99,8 %         | 0              | 0              | 0             |
| sp Q01129 P.RAT.fasta       | 39 806,8      | 100,0 %        | 1              | 1              | 1             |
| sp Q7M0E3 I.RAT.fasta       | 18 534,1      | 100,0 %        | 4              | 4              | 5             |
| tr Q9JI04 Q9.RAT.fasta      | 171 575,7     | 100,0 %        | 3              | 3              | 3             |



|                          |           |         |    |    |     |
|--------------------------|-----------|---------|----|----|-----|
| tr F1M983 F: RAT.fasta   | 140 007,0 | 7,9 %   | 0  | 0  | 0   |
| sp P21575-3  RAT.fasta   | 92 378,1  | 99,0 %  | 0  | 0  | 0   |
| tr D3ZQR7 D: RAT.fasta   | 87 014,0  | 100,0 % | 14 | 14 | 18  |
| tr F8WGA3 F RAT.fasta    | 42 336,0  | 96,1 %  | 0  | 0  | 0   |
| tr A7M777 A7M777_RAT     | 0,0       | 100,0 % | 5  | 5  | 5   |
| sp P04639 A: RAT.fasta   | 30 062,4  | 8,9 %   | 0  | 0  | 0   |
| sp Q9ERB4-2: RAT.fasta   | 300 004,9 | 24,9 %  | 0  | 0  | 0   |
| sp P68255 1: RAT.fasta   | 27 779,4  | 100,0 % | 2  | 2  | 3   |
| sp P07151 B: RAT.fasta   | 13 720,0  | 100,0 % | 4  | 6  | 8   |
| sp Q9ROJ8 L: RAT.fasta   | 49 465,8  | 99,9 %  | 0  | 0  | 0   |
| sp P62738 A: RAT.fasta   | 42 010,1  | 100,0 % | 6  | 7  | 10  |
| tr D4ADG9 D: RAT.fasta   | 66 931,9  | 100,0 % | 4  | 4  | 4   |
| tr F1LUQ1 F1LUQ1_RAT     | 0,0       | 100,0 % | 5  | 5  | 5   |
| sp P31044 P: RAT.fasta   | 20 801,4  | 95,0 %  | 1  | 1  | 1   |
| tr F1M9V7 F: RAT.fasta   | 103 347,0 | 100,0 % | 0  | 0  | 0   |
| tr F1M7P4 F: RAT.fasta   | 53 983,3  | 24,9 %  | 0  | 0  | 0   |
| sp P11598 P: RAT.fasta   | 56 625,5  | 92,0 %  | 0  | 0  | 0   |
| sp Q9WVH8 : RAT.fasta    | 50 159,8  | 100,0 % | 1  | 1  | 2   |
| sp Q5XII0 EP: RAT.fasta  | 25 639,5  | 100,0 % | 4  | 4  | 5   |
| sp Q63416 I: RAT.fasta   | 99 099,5  | 100,0 % | 1  | 1  | 2   |
| sp P16975 S: RAT.fasta   | 34 295,7  | 100,0 % | 16 | 25 | 155 |
| sp O35793 G: RAT.fasta   | 20 680,0  | 100,0 % | 1  | 1  | 2   |
| sp P97697 I: RAT.fasta   | 30 511,6  | 95,8 %  | 0  | 0  | 0   |
| sp P82995 H: RAT.fasta   | 84 818,3  | 100,0 % | 2  | 2  | 2   |
| sp P20961 P: RAT.fasta   | 45 010,6  | 100,0 % | 20 | 29 | 68  |
| sp P30121 T: RAT.fasta   | 24 357,0  | 100,0 % | 11 | 14 | 29  |
| tr Q6IFV6 Q: RAT.fasta   | 50 675,4  | 100,0 % | 5  | 5  | 5   |
| tr D4A7Y1 D: RAT.fasta   | 224 612,0 | 100,0 % | 8  | 9  | 15  |
| tr B5DF94 B5DF94_RAT, tr | 0,0       | 100,0 % | 2  | 2  | 7   |
| sp P09812 P: RAT.fasta   | 97 276,7  | 93,3 %  | 0  | 0  | 0   |
| sp P08721 O: RAT.fasta   | 34 962,7  | 100,0 % | 4  | 4  | 5   |
| tr D3ZUK7 D3ZUK7_RAT     | 0,0       | 9,4 %   | 0  | 0  | 0   |
| tr D3ZRK9 D: RAT.fasta   | 0,0       | 99,9 %  | 0  | 0  | 0   |
| tr D3ZJ08 D3: RAT.fasta  | 15 388,7  | 100,0 % | 2  | 2  | 2   |
| sp Q08163 C: RAT.fasta   | 51 588,9  | 15,6 %  | 0  | 0  | 0   |
| sp P19332-2 : RAT.fasta  | 71 773,6  | 79,1 %  | 0  | 0  | 0   |
| sp P36953 A: RAT.fasta   | 69 336,5  | 99,5 %  | 0  | 0  | 0   |
| sp Q63544 S: RAT.fasta   | 12 975,3  | 31,7 %  | 0  | 0  | 0   |
| sp P00697 L: RAT.fasta   | 16 729,2  | 100,0 % | 3  | 3  | 6   |
| sp P02091 H: RAT.fasta   | 15 979,4  | 100,0 % | 2  | 2  | 10  |
| sp Q99MZ8 I: RAT.fasta   | 29 969,9  | 100,0 % | 2  | 2  | 2   |
| tr D4AC70 D: RAT.fasta   | 73 452,3  | 100,0 % | 2  | 2  | 2   |
| sp P10860 D: RAT.fasta   | 61 417,4  | 98,8 %  | 0  | 0  | 0   |
| sp Q9ROD6 T: RAT.fasta   | 47 421,5  | 100,0 % | 4  | 4  | 4   |
| sp Q6P7Q4 L: RAT.fasta   | 20 820,7  | 99,2 %  | 0  | 0  | 0   |
| sp P15999 A: RAT.fasta   | 59 755,2  | 100,0 % | 1  | 1  | 1   |
| sp P06238 A: RAT.fasta   | 163 785,7 | 100,0 % | 2  | 3  | 6   |
| tr F1LPS8 F1: RAT.fasta  | 33 737,1  | 43,9 %  | 0  | 0  | 0   |
| sp P36972 A: RAT.fasta   | 19 546,6  | 100,0 % | 2  | 2  | 2   |
| sp Q9JHU0 D: RAT.fasta   | 61 539,8  | 98,2 %  | 0  | 0  | 0   |
| tr F1M798 F: RAT.fasta   | 111 649,0 | 100,0 % | 2  | 2  | 2   |

|                         |           |         |    |     |     |
|-------------------------|-----------|---------|----|-----|-----|
| sp P62161 C RAT.fasta   | 16 838,0  | 100,0 % | 3  | 3   | 4   |
| sp P17475 A RAT.fasta   | 46 137,6  | 99,7 %  | 0  | 0   | 0   |
| tr F1MA59 F RAT.fasta   | 160 614,4 | 100,0 % | 4  | 4   | 4   |
| sp P60711 A RAT.fasta   | 41 737,8  | 100,0 % | 18 | 33  | 105 |
| sp P11980 K RAT.fasta   | 57 818,6  | 100,0 % | 3  | 3   | 6   |
| sp Q00715 H RAT.fasta   | 13 990,6  | 100,0 % | 3  | 4   | 13  |
| sp Q9JK11 R RAT.fasta   | 126 391,0 | 100,0 % | 0  | 0   | 0   |
| sp P55068 P RAT.fasta   | 96 057,1  | 97,9 %  | 0  | 0   | 0   |
| tr F1M9B2 F RAT.fasta   | 28 948,7  | 100,0 % | 12 | 14  | 34  |
| sp P47709 R RAT.fasta   | 75 833,3  | 100,0 % | 0  | 0   | 0   |
| sp P31000 V RAT.fasta   | 53 733,9  | 100,0 % | 23 | 26  | 52  |
| tr F1LM30 F RAT.fasta   | 51 745,4  | 89,6 %  | 0  | 0   | 0   |
| sp Q07439 H RAT.fasta   | 70 186,8  | 100,0 % | 2  | 2   | 2   |
| tr B2RYM3 B RAT.fasta   | 100 589,7 | 15,0 %  | 0  | 0   | 0   |
| sp P07722 M RAT.fasta   | 69 352,9  | 48,1 %  | 0  | 0   | 0   |
| sp P16636 L RAT.fasta   | 46 558,9  | 100,0 % | 2  | 2   | 2   |
| tr F1M566 F RAT.fasta   | 230 834,3 | 100,0 % | 5  | 5   | 5   |
| sp P02650 A RAT.fasta   | 35 753,4  | 100,0 % | 5  | 5   | 6   |
| tr F1LR02 F RAT.fasta   | 134 646,3 | 99,4 %  | 0  | 0   | 0   |
| tr B0K010 B RAT.fasta   | 14 091,9  | 98,6 %  | 0  | 0   | 0   |
| sp P02454 C RAT.fasta   | 137 953,8 | 100,0 % | 98 | 147 | 996 |
| sp P04764 E RAT.fasta   | 47 129,0  | 100,0 % | 8  | 9   | 14  |
| tr F1M8G9 F RAT.fasta   | 91 166,5  | 97,5 %  | 0  | 0   | 0   |
| sp Q07257-2 RAT.fasta   | 50 535,3  | 100,0 % | 4  | 4   | 5   |
| sp Q68FP1-2 RAT.fasta   | 86 067,9  | 99,4 %  | 1  | 1   | 1   |
| sp P10719 A RAT.fasta   | 56 354,3  | 100,0 % | 3  | 3   | 3   |
| sp P0CG51 U RAT.fasta   | 14 728,9  | 100,0 % | 2  | 2   | 8   |
| sp Q03626 N RAT.fasta   | 165 327,3 | 93,5 %  | 0  | 0   | 0   |
| sp P05544 S RAT.fasta   | 46 279,0  | 30,1 %  | 0  | 0   | 0   |
| sp Q6IG01 K RAT.fasta   | 57 256,1  | 100,0 % | 2  | 2   | 2   |
| sp P35053 G RAT.fasta   | 61 735,5  | 100,0 % | 2  | 2   | 3   |
| tr Q5RJR9 Q RAT.fasta   | 46 563,0  | 100,0 % | 3  | 4   | 4   |
| sp Q64559-1 RAT.fasta   | 37 560,3  | 17,5 %  | 0  | 0   | 0   |
| sp P34058 H RAT.fasta   | 83 284,3  | 100,0 % | 5  | 5   | 5   |
| sp P05708 H RAT.fasta   | 102 411,0 | 99,8 %  | 0  | 0   | 0   |
| sp Q6P0K8 P RAT.fasta   | 81 801,9  | 100,0 % | 8  | 11  | 15  |
| tr F1LM42 F RAT.fasta   | 434 346,5 | 100,0 % | 0  | 0   | 0   |
| sp P85972 V RAT.fasta   | 116 617,3 | 100,0 % | 5  | 6   | 7   |
| sp P11442 C RAT.fasta   | 0,0       | 100,0 % | 1  | 1   | 1   |
| sp P05982 N RAT.fasta   | 30 947,5  | 100,0 % | 5  | 6   | 6   |
| sp P21961 CBPA3_RAT-DEC | 0,0       | 99,8 %  | 0  | 0   | 0   |
| sp Q6P7B4 F RAT.fasta   | 58 207,2  | 100,0 % | 0  | 0   | 0   |
| tr D3ZP82 D RAT.fasta   | 83 627,0  | 100,0 % | 6  | 7   | 9   |
| sp Q6IFU7 K RAT.fasta   | 50 214,0  | 100,0 % | 3  | 3   | 6   |
| tr C0JPT7 C0 RAT.fasta  | 280 485,3 | 100,0 % | 4  | 4   | 4   |
| sp P63329-2 RAT.fasta   | 58 645,7  | 99,4 %  | 0  | 0   | 0   |
| tr F8WG88 F RAT.fasta   | 60 600,9  | 100,0 % | 16 | 22  | 54  |
| sp Q63691 C RAT.fasta   | 40 055,2  | 15,7 %  | 0  | 0   | 0   |
| sp P09606 G RAT.fasta   | 42 268,3  | 34,9 %  | 0  | 0   | 0   |
| sp P24268 C RAT.fasta   | 44 682,0  | 100,0 % | 6  | 9   | 11  |
| sp Q4FZU2 K RAT.fasta   | 59 250,6  | 100,0 % | 3  | 3   | 27  |

|                         |           |         |    |    |     |
|-------------------------|-----------|---------|----|----|-----|
| sp Q9Z1P2 A RAT.fasta   | 102 963,9 | 100,0 % | 7  | 7  | 8   |
| sp P09006 Sf RAT.fasta  | 46 654,0  | 27,2 %  | 0  | 0  | 0   |
| sp Q05982 N RAT.fasta   | 17 193,0  | 100,0 % | 6  | 7  | 10  |
| tr D3ZK12 D3ZK12_RAT    | 0,0       | 100,0 % | 8  | 8  | 12  |
| tr D3ZFH5 D: RAT.fasta  | 106 528,4 | 100,0 % | 3  | 3  | 7   |
| tr F1LRX5 F1LRX5_RAT    | 0,0       | 100,0 % | 0  | 0  | 0   |
| sp P31722 C: RAT.fasta  | 25 685,9  | 27,9 %  | 0  | 0  | 0   |
| sp O08628 P RAT.fasta   | 50 185,1  | 100,0 % | 16 | 18 | 44  |
| sp P39069 K/ RAT.fasta  | 21 584,4  | 99,6 %  | 0  | 0  | 0   |
| tr E9PSV5 E9 RAT.fasta  | 40 490,9  | 100,0 % | 0  | 0  | 0   |
| sp P07895 S( RAT.fasta  | 24 674,3  | 99,5 %  | 0  | 0  | 0   |
| sp P13941 C( RAT.fasta  | 138 936,9 | 100,0 % | 54 | 76 | 337 |
| tr F1LYE8 F1LYE8_RAT    | 0,0       | 100,0 % | 0  | 0  | 0   |
| tr D3ZFC6 D: RAT.fasta  | 103 757,3 | 92,4 %  | 0  | 0  | 0   |
| tr E9PSN4 E9 RAT.fasta  | 203 528,4 | 100,0 % | 2  | 2  | 2   |
| sp P10111 PI RAT.fasta  | 17 874,8  | 100,0 % | 5  | 6  | 16  |
| sp P19944 RI RAT.fasta  | 11 498,1  | 95,0 %  | 1  | 1  | 1   |
| sp P13221 A/ RAT.fasta  | 46 429,5  | 13,8 %  | 0  | 0  | 0   |
| sp P04937 FI RAT.fasta  | 272 503,7 | 91,8 %  | 1  | 1  | 2   |
| tr D3ZQM5 D3ZQM5_RAT    | 0,0       | 100,0 % | 5  | 5  | 7   |
| sp P85971 6f RAT.fasta  | 27 235,0  | 100,0 % | 2  | 2  | 2   |
| sp P17246 T( RAT.fasta  | 44 330,0  | 100,0 % | 3  | 3  | 3   |
| tr Q5IOM1 Q RAT.fasta   | 38 457,3  | 28,6 %  | 0  | 0  | 0   |
| tr D3Z8P5 D: RAT.fasta  | 35 269,8  | 99,7 %  | 0  | 0  | 0   |
| sp P35704 PI RAT.fasta  | 21 784,1  | 99,8 %  | 1  | 1  | 1   |
| sp Q4QRB4 T RAT.fasta   | 50 418,7  | 95,0 %  | 1  | 1  | 1   |
| sp P01026 C( RAT.fasta  | 186 462,2 | 100,0 % | 5  | 5  | 9   |
| sp Q63772 G RAT.fasta   | 74 637,2  | 99,6 %  | 1  | 1  | 1   |
| sp P14480 FI RAT.fasta  | 54 235,8  | 97,7 %  | 0  | 0  | 0   |
| sp P62804 H- RAT.fasta  | 11 367,7  | 100,0 % | 5  | 6  | 12  |
| tr D3ZVB7 D: RAT.fasta  | 34 071,5  | 100,0 % | 2  | 2  | 2   |
| sp P04785 PI RAT.fasta  | 56 953,4  | 100,0 % | 1  | 1  | 1   |
| sp P02680-2  RAT.fasta  | 50 634,3  | 63,6 %  | 0  | 0  | 0   |
| sp Q9JI85 NL RAT.fasta  | 50 091,2  | 100,0 % | 5  | 8  | 14  |
| sp Q01177 P RAT.fasta   | 90 535,1  | 100,0 % | 1  | 1  | 1   |
| sp P10960 S/ RAT.fasta  | 61 122,8  | 100,0 % | 6  | 6  | 6   |
| tr Q6AYQ9 Q RAT.fasta   | 23 009,6  | 100,0 % | 5  | 8  | 9   |
| sp Q5RJP7 P( RAT.fasta  | 41 932,9  | 100,0 % | 4  | 4  | 4   |
| sp Q6IG00 K: RAT.fasta  | 57 668,2  | 5,1 %   | 0  | 0  | 0   |
| tr Q9ES33 Q( RAT.fasta  | 30 762,0  | 100,0 % | 7  | 11 | 26  |
| sp Q9R1E9 C RAT.fasta   | 37 755,2  | 100,0 % | 11 | 11 | 29  |
| sp Q63768-2  RAT.fasta  | 33 844,8  | 9,8 %   | 0  | 0  | 0   |
| sp P25113 P( RAT.fasta  | 28 832,8  | 100,0 % | 4  | 4  | 4   |
| sp Q63560 N RAT.fasta   | 100 484,2 | 100,0 % | 0  | 0  | 0   |
| sp Q6AY84 S RAT.fasta   | 46 396,0  | 21,3 %  | 0  | 0  | 0   |
| sp Q9WUW3 RAT.fasta     | 67 296,6  | 8,1 %   | 0  | 0  | 0   |
| sp P51635 AI RAT.fasta  | 36 506,2  | 100,0 % | 4  | 4  | 9   |
| tr Q9QX80 Q RAT.fasta   | 30 853,6  | 16,9 %  | 0  | 0  | 0   |
| tr F1LRZ7 F1l RAT.fasta | 114 411,8 | 100,0 % | 2  | 2  | 17  |
| sp Q6P6Q2 k RAT.fasta   | 61 827,3  | 100,0 % | 19 | 23 | 110 |
| sp P35213 1/ RAT.fasta  | 28 055,2  | 100,0 % | 1  | 1  | 2   |

|                         |           |         |    |    |    |
|-------------------------|-----------|---------|----|----|----|
| tr D3ZDF6 D3ZDF6_RAT    | 0,0       | 100,0 % | 2  | 2  | 2  |
| tr F1LM84 F1RAT.fasta   | 137 037,9 | 100,0 % | 17 | 17 | 27 |
| sp P33436 M RAT.fasta   | 74 151,7  | 100,0 % | 24 | 28 | 59 |
| tr F1LMV6 F1RAT.fasta   | 332 400,6 | 100,0 % | 24 | 27 | 43 |
| sp Q9WV75 F1RAT.fasta   | 36 014,6  | 100,0 % | 2  | 2  | 3  |
| sp P12839 N RAT.fasta   | 95 790,7  | 100,0 % | 0  | 0  | 0  |
| tr F1LUV9 F1RAT.fasta   | 92 311,9  | 99,3 %  | 0  | 0  | 0  |
| sp Q6P6V0 G RAT.fasta   | 62 829,3  | 100,0 % | 0  | 0  | 0  |
| tr F1LUH9 F1LUH9_RAT    | 0,0       | 100,0 % | 3  | 3  | 3  |
| sp P48679 L1RAT.fasta   | 74 325,0  | 100,0 % | 5  | 5  | 6  |
| sp P97685-3 I RAT.fasta | 132 181,4 | 99,8 %  | 0  | 0  | 0  |
| sp Q9EPB1 D RAT.fasta   | 55 115,3  | 100,0 % | 2  | 2  | 5  |
| tr D3ZM43 D3ZM43_RAT    | 0,0       | 99,9 %  | 0  | 0  | 0  |
| tr F1LNH3 F1RAT.fasta   | 109 660,6 | 100,0 % | 4  | 4  | 4  |
| sp P45592 C1RAT.fasta   | 18 533,2  | 100,0 % | 6  | 6  | 6  |
| sp P09951-2 J RAT.fasta | 73 988,3  | 7,6 %   | 0  | 0  | 0  |
| sp Q5XIF6 TE RAT.fasta  | 49 924,6  | 95,0 %  | 1  | 1  | 1  |
| sp Q62930 C RAT.fasta   | 62 282,5  | 99,5 %  | 0  | 0  | 0  |
| sp P02688-2 K RAT.fasta | 18 488,3  | 100,0 % | 2  | 2  | 4  |
| sp P14141 C2RAT.fasta   | 29 431,8  | 100,0 % | 0  | 0  | 0  |
| sp O35276 N RAT.fasta   | 103 899,5 | 100,0 % | 2  | 2  | 2  |
| sp Q6IFU8 K3RAT.fasta   | 48 123,9  | 100,0 % | 6  | 7  | 24 |
| sp Q63041 A RAT.fasta   | 167 126,0 | 100,0 % | 1  | 1  | 1  |
| tr D3ZVQ0 D RAT.fasta   | 95 780,8  | 99,3 %  | 0  | 0  | 0  |
| sp P47819 G RAT.fasta   | 49 957,9  | 100,0 % | 1  | 1  | 23 |
| sp P50399 G RAT.fasta   | 50 539,1  | 100,0 % | 5  | 5  | 5  |
| tr B2GV03 B2GV03_RAT    | 0,0       | 100,0 % | 0  | 0  | 0  |
| sp P61983 L4RAT.fasta   | 28 303,1  | 100,0 % | 2  | 2  | 4  |
| sp Q07258 T1RAT.fasta   | 47 116,4  | 100,0 % | 2  | 2  | 2  |
| sp P07335 K1RAT.fasta   | 42 726,1  | 25,9 %  | 0  | 0  | 0  |
| tr D3ZQP6 D1RAT.fasta   | 75 143,5  | 100,0 % | 1  | 1  | 1  |
| sp A2RUV9 A RAT.fasta   | 128 063,7 | 100,0 % | 6  | 6  | 12 |
| sp P07632 S1RAT.fasta   | 15 910,7  | 100,0 % | 4  | 4  | 7  |
| tr F8WFW0 F8WFW0_RAT    | 0,0       | 99,8 %  | 0  | 0  | 0  |
| sp P03994 H RAT.fasta   | 40 262,4  | 99,7 %  | 0  | 0  | 0  |
| sp P04905 G1RAT.fasta   | 25 915,9  | 96,2 %  | 0  | 0  | 0  |
| sp Q00959 NMDE1_RAT-D1  | 0,0       | 99,8 %  | 0  | 0  | 0  |
| sp P02770 A1RAT.fasta   | 68 731,2  | 100,0 % | 3  | 5  | 32 |
| tr Q8CHN5 C RAT.fasta   | 16 363,9  | 100,0 % | 5  | 6  | 9  |
| sp Q5XI73 G1RAT.fasta   | 23 408,0  | 100,0 % | 5  | 6  | 7  |
| sp P24368 P1RAT.fasta   | 23 802,9  | 100,0 % | 8  | 9  | 9  |
| sp Q9WUQ1 I RAT.fasta   | 105 705,8 | 100,0 % | 3  | 3  | 3  |
| tr Q6IN22 Q1RAT.fasta   | 37 544,1  | 100,0 % | 15 | 19 | 49 |
| tr D3ZQ74 D1RAT.fasta   | 83 615,3  | 100,0 % | 1  | 1  | 1  |
| tr E9PSN2 E9RAT.fasta   | 0,0       | 100,0 % | 1  | 1  | 1  |
| tr F1LRL9 F1I RAT.fasta | 269 643,4 | 100,0 % | 0  | 0  | 0  |
| sp P11232 T1RAT.fasta   | 11 673,3  | 100,0 % | 2  | 2  | 4  |
| sp Q5RKI0 W RAT.fasta   | 66 181,1  | 81,8 %  | 0  | 0  | 0  |
| sp P60203 M RAT.fasta   | 30 077,7  | 100,0 % | 3  | 3  | 4  |
| sp O88989 N RAT.fasta   | 36 483,9  | 100,0 % | 4  | 4  | 4  |
| tr B1WC91 B RAT.fasta   | 35 043,1  | 100,0 % | 6  | 8  | 21 |

|                         |           |         |    |    |    |
|-------------------------|-----------|---------|----|----|----|
| tr D3ZZ86 D3 RAT.fasta  | 0,0       | 100,0 % | 2  | 2  | 2  |
| sp P04797 G RAT.fasta   | 35 828,1  | 100,0 % | 0  | 0  | 0  |
| sp P85515 A RAT.fasta   | 42 615,2  | 97,5 %  | 0  | 0  | 0  |
| sp Q63945 S RAT.fasta   | 33 406,4  | 99,1 %  | 0  | 0  | 0  |
| sp P02767 T RAT.fasta   | 15 719,9  | 94,3 %  | 0  | 0  | 0  |
| sp P04276 V RAT.fasta   | 53 545,6  | 99,9 %  | 0  | 0  | 0  |
| tr D3ZTX4 D3ZTX4_RAT-DE | 0,0       | 99,8 %  | 0  | 0  | 0  |
| sp P60881 S RAT.fasta   | 23 315,4  | 13,0 %  | 0  | 0  | 0  |
| sp Q64361 L RAT.fasta   | 25 579,1  | 95,0 %  | 1  | 1  | 1  |
| sp P23593 A RAT.fasta   | 21 635,8  | 19,7 %  | 0  | 0  | 0  |
| tr Q3MIE4 Q3MIE4_RAT    | 0,0       | 100,0 % | 4  | 4  | 4  |
| sp Q6IMF3 K RAT.fasta   | 64 831,7  | 100,0 % | 6  | 9  | 69 |
| sp P06686 A RAT.fasta   | 112 220,7 | 91,8 %  | 0  | 0  | 0  |
| sp P52303-2  RAT.fasta  | 104 591,4 | 5,1 %   | 0  | 0  | 0  |
| sp Q6IFV1 K RAT.fasta   | 52 684,9  | 100,0 % | 10 | 12 | 48 |
| tr D3ZXM9 D RAT.fasta   | 131 885,3 | 99,1 %  | 0  | 0  | 0  |
| tr B2RZ27 B2 RAT.fasta  | 10 476,8  | 95,0 %  | 1  | 1  | 1  |
| sp Q63716 P RAT.fasta   | 22 110,2  | 100,0 % | 4  | 4  | 5  |
| sp P47942 D RAT.fasta   | 62 277,9  | 98,9 %  | 0  | 0  | 0  |
| sp Q64240 A RAT.fasta   | 38 851,4  | 99,7 %  | 0  | 0  | 0  |
| tr Q3MHS9 C RAT.fasta   | 58 018,4  | 27,2 %  | 0  | 0  | 0  |
| sp P47875 C RAT.fasta   | 20 613,2  | 100,0 % | 5  | 6  | 6  |
| tr D3ZTB5 D3 RAT.fasta  | 11 198,3  | 18,0 %  | 0  | 0  | 0  |
| sp P20059 H RAT.fasta   | 51 351,5  | 98,3 %  | 0  | 0  | 0  |
| sp Q63434 P RAT.fasta   | 17 681,3  | 100,0 % | 2  | 2  | 2  |
| sp Q9ESM2 I RAT.fasta   | 38 047,2  | 32,2 %  | 0  | 0  | 0  |
| sp P34926 M RAT.fasta   | 299 530,8 | 96,3 %  | 0  | 0  | 0  |
| sp P70490 M RAT.fasta   | 47 413,4  | 100,0 % | 15 | 17 | 33 |
| sp Q5FVH0 C RAT.fasta   | 25 334,7  | 100,0 % | 3  | 3  | 3  |
| sp P47853 P RAT.fasta   | 41 708,6  | 100,0 % | 15 | 22 | 89 |
| tr F1LTF8 F1I RAT.fasta | 195 626,6 | 100,0 % | 2  | 2  | 2  |
| sp P14046 A RAT.fasta   | 163 774,4 | 99,9 %  | 1  | 1  | 5  |
| sp Q63202 A RAT.fasta   | 82 310,9  | 98,4 %  | 0  | 0  | 0  |
| sp Q9EPC6 P RAT.fasta   | 15 002,1  | 94,3 %  | 0  | 0  | 0  |
| sp Q6P9T8 TBB2C_RAT     | 0,0       | 99,6 %  | 1  | 1  | 1  |
| sp Q9QUL6 I RAT.fasta   | 82 655,5  | 97,3 %  | 0  | 0  | 0  |
| sp Q6IG02 K RAT.fasta   | 69 127,7  | 100,0 % | 8  | 10 | 50 |
| sp P63018 H RAT.fasta   | 70 872,8  | 100,0 % | 2  | 2  | 2  |
| sp P47728 C RAT.fasta   | 31 406,7  | 16,0 %  | 0  | 0  | 0  |
| sp P35745 A RAT.fasta   | 10 863,2  | 19,3 %  | 0  | 0  | 0  |
| sp P07154 C RAT.fasta   | 37 660,6  | 100,0 % | 7  | 8  | 12 |
| tr A7M778 A RAT.fasta   | 53 484,3  | 100,0 % | 12 | 13 | 20 |
| sp P42123 LI RAT.fasta  | 36 612,5  | 100,0 % | 1  | 1  | 2  |
| sp P20909 C RAT.fasta   | 181 029,5 | 100,0 % | 6  | 6  | 6  |
| sp P05065 A RAT.fasta   | 39 352,6  | 100,0 % | 2  | 2  | 2  |
| sp P51886 LI RAT.fasta  | 38 281,3  | 100,0 % | 11 | 14 | 46 |
| tr F1LP60 F1I RAT.fasta | 67 653,6  | 100,0 % | 7  | 8  | 8  |
| tr D3ZUL3 D3 RAT.fasta  | 108 807,3 | 100,0 % | 9  | 9  | 13 |
| tr D3ZY51 D3 RAT.fasta  | 67 218,5  | 100,0 % | 3  | 3  | 5  |
| tr F1LQ11 F1I RAT.fasta | 34 157,9  | 7,7 %   | 0  | 0  | 0  |
| sp P06866 H RAT.fasta   | 38 563,0  | 13,0 %  | 0  | 0  | 0  |

|                           |           |         |    |     |     |
|---------------------------|-----------|---------|----|-----|-----|
| tr F1LST1 F1 RAT.fasta    | 202 546,0 | 100,0 % | 96 | 137 | 454 |
| tr D3Z9F8 D3 RAT.fasta    | 212 445,0 | 100,0 % | 69 | 81  | 123 |
| tr D4A6X4 D4 RAT.fasta    | 11 311,9  | 85,5 %  | 0  | 0   | 0   |
| sp P06399 F1 RAT.fasta    | 86 687,8  | 96,6 %  | 0  | 0   | 0   |
| sp P04904 G1 RAT.fasta    | 25 320,4  | 43,9 %  | 0  | 0   | 0   |
| tr F1LPM2 F1LPM2_RAT      | 0,0       | 100,0 % | 2  | 2   | 2   |
| sp Q63083 N RAT.fasta     | 53 506,9  | 100,0 % | 10 | 10  | 15  |
| sp P08494 M RAT.fasta     | 12 037,1  | 100,0 % | 1  | 1   | 3   |
| sp P46462 T1 RAT.fasta    | 89 351,8  | 100,0 % | 2  | 2   | 2   |
| sp P62260 14 RAT.fasta    | 29 175,0  | 100,0 % | 3  | 3   | 4   |
| sp P85970 A1 RAT.fasta    | 34 391,8  | 100,0 % | 2  | 2   | 2   |
| tr D3ZFY8 D3 RAT.fasta    | 16 354,8  | 97,7 %  | 0  | 0   | 0   |
| tr F1LPD0 F1 RAT.fasta    | 0,0       | 88,7 %  | 0  | 0   | 0   |
| tr D3ZUM4 C RAT.fasta     | 73 231,2  | 100,0 % | 1  | 1   | 1   |
| sp P19804 N RAT.fasta     | 17 283,3  | 100,0 % | 3  | 3   | 3   |
| sp Q61FW6 K RAT.fasta     | 56 506,5  | 100,0 % | 20 | 27  | 183 |
| sp B0BND0 E RAT.fasta     | 50 702,6  | 6,2 %   | 0  | 0   | 0   |
| sp Q5FVJ0-2 RAT.fasta     | 52 909,0  | 100,0 % | 0  | 0   | 0   |
| sp B2RYG6 O RAT.fasta     | 31 270,5  | 62,2 %  | 1  | 1   | 1   |
| sp P24090 F1 RAT.fasta    | 37 981,1  | 99,4 %  | 0  | 0   | 0   |
| sp P04636 M RAT.fasta     | 35 684,2  | 100,0 % | 3  | 3   | 4   |
| sp Q63532 S1 RAT.fasta    | 16 731,5  | 100,0 % | 2  | 2   | 3   |
| sp P11030 A1 RAT.fasta    | 10 027,9  | 95,8 %  | 0  | 0   | 0   |
| sp Q6MGD0 RAT.fasta       | 18 658,7  | 90,7 %  | 0  | 0   | 0   |
| sp Q08420 S1 RAT.fasta    | 26 619,3  | 100,0 % | 2  | 3   | 5   |
| tr Q5M7T5 C RAT.fasta     | 52 235,3  | 100,0 % | 1  | 1   | 2   |
| tr F1MAF7 F1 RAT.fasta    | 46 837,1  | 100,0 % | 10 | 11  | 12  |
| tr D3ZWHO D3ZWHO_RAT-10,0 | 0,0       | 100,0 % | 2  | 2   | 2   |
| tr F1LSW0 F1LSW0_RAT      | 0,0       | 100,0 % | 15 | 16  | 58  |
| sp P01830 T1 RAT.fasta    | 18 172,8  | 100,0 % | 1  | 1   | 1   |
| sp B0BNI5 O1 RAT.fasta    | 45 962,3  | 99,9 %  | 1  | 1   | 1   |
| sp P18331 I1 RAT.fasta    | 47 406,9  | 100,0 % | 12 | 12  | 13  |
| sp Q920J4 T1 RAT.fasta    | 32 249,5  | 31,3 %  | 0  | 0   | 0   |
| sp Q6AY61 P RAT.fasta     | 43 161,1  | 100,0 % | 3  | 3   | 3   |
| tr Q9JKB7 Q1 RAT.fasta    | 50 901,6  | 100,0 % | 1  | 1   | 1   |
| sp P97546-3 RAT.fasta     | 43 932,2  | 100,0 % | 2  | 2   | 2   |
| sp Q64537 C RAT.fasta     | 28 571,1  | 99,2 %  | 0  | 0   | 0   |
| sp O88600 H RAT.fasta     | 94 057,4  | 100,0 % | 1  | 1   | 1   |
| sp P14668 A1 RAT.fasta    | 35 746,5  | 99,9 %  | 0  | 0   | 0   |
| sp P05371 C1 RAT.fasta    | 51 375,6  | 100,0 % | 2  | 2   | 2   |
| tr F1MAG6 F1MAG6_RAT      | 0,0       | 100,0 % | 0  | 0   | 0   |
| sp P07943 A1 RAT.fasta    | 35 797,7  | 100,0 % | 4  | 4   | 4   |
| sp Q5PPN5 T RAT.fasta     | 18 980,2  | 27,7 %  | 0  | 0   | 0   |
| sp P07150 A1 RAT.fasta    | 38 831,0  | 100,0 % | 2  | 2   | 3   |
| sp P00762 T1 RAT.fasta    | 25 959,1  | 100,0 % | 5  | 6   | 122 |
| sp P13233 C1 RAT.fasta    | 47 270,0  | 99,6 %  | 0  | 0   | 0   |
| sp P23785 G RAT.fasta     | 63 366,6  | 100,0 % | 3  | 3   | 5   |
| tr D4A111 D4 RAT.fasta    | 306 150,3 | 96,0 %  | 0  | 0   | 0   |
| tr D3ZF59 D3ZF59_RAT      | 0,0       | 100,0 % | 2  | 2   | 2   |
| sp P48500 T1 RAT.fasta    | 26 848,7  | 100,0 % | 6  | 6   | 9   |
| sp P62963 P1 RAT.fasta    | 14 957,3  | 100,0 % | 8  | 11  | 18  |

|                            |           |         |    |    |    |
|----------------------------|-----------|---------|----|----|----|
| sp Q62611-2 RAT.fasta      | 64 406,5  | 100,0 % | 5  | 5  | 5  |
| sp P07936 N RAT.fasta      | 23 603,2  | 99,1 %  | 0  | 0  | 0  |
| sp P50137 T1 RAT.fasta     | 67 644,7  | 100,0 % | 0  | 0  | 0  |
| sp P62630 E1 RAT.fasta     | 50 114,2  | 100,0 % | 6  | 7  | 15 |
| sp P12346 T1 RAT.fasta     | 76 395,6  | 100,0 % | 4  | 5  | 6  |
| tr Q6IFZ5 Q6 RAT.fasta     | 61 759,6  | 100,0 % | 2  | 2  | 3  |
| sp Q6P7S1 A RAT.fasta      | 44 444,6  | 75,8 %  | 0  | 0  | 0  |
| tr F1LNN9 F1LNN9_RAT       | 0,0       | 100,0 % | 2  | 2  | 3  |
| sp P19527 N RAT.fasta      | 61 336,5  | 43,9 %  | 0  | 0  | 0  |
| sp P14841 C RAT.fasta      | 15 436,8  | 100,0 % | 5  | 7  | 25 |
| tr Q5U2V1 Q RAT.fasta      | 64 788,7  | 100,0 % | 8  | 9  | 9  |
| sp P11762 LE RAT.fasta     | 14 857,2  | 100,0 % | 6  | 7  | 15 |
| tr D3ZHA0 D RAT.fasta      | 290 978,7 | 99,9 %  | 0  | 0  | 0  |
| sp Q5XI43 M RAT.fasta      | 42 734,8  | 100,0 % | 4  | 4  | 4  |
| sp P63102 14 RAT.fasta     | 27 771,9  | 100,0 % | 12 | 12 | 23 |
| sp Q2Q019 FI RAT.fasta     | 194 048,8 | 100,0 % | 9  | 10 | 11 |
| tr D4A0Y1 D4A0Y1_RAT       | 0,0       | 100,0 % | 6  | 6  | 12 |
| sp Q78P75 D RAT.fasta      | 10 350,1  | 27,0 %  | 0  | 0  | 0  |
| sp Q9ER34 A RAT.fasta      | 85 436,1  | 99,8 %  | 0  | 0  | 0  |
| sp P08413 K1 RAT.fasta     | 60 402,3  | 99,3 %  | 0  | 0  | 0  |
| tr F1M9K9 F1 RAT.fasta     | 120 417,4 | 55,2 %  | 0  | 0  | 0  |
| sp P05197 E1 RAT.fasta     | 95 286,0  | 100,0 % | 2  | 2  | 3  |
| tr F1LRR0 F1LRR0_RAT, tr F | 0,0       | 100,0 % | 25 | 33 | 93 |
| tr D4A856 D4A856_RAT       | 0,0       | 15,6 %  | 0  | 0  | 0  |
| tr D4A115 D4 RAT.fasta     | 240 199,7 | 100,0 % | 7  | 7  | 9  |
| sp Q9JLJ3 AL RAT.fasta     | 53 653,2  | 94,3 %  | 0  | 0  | 0  |
| tr E9PSV0 E9PSV0_RAT       | 0,0       | 100,0 % | 2  | 2  | 2  |
| sp P70564 S1 RAT.fasta     | 42 065,2  | 100,0 % | 2  | 2  | 2  |
| tr D3ZZX3 D3ZZX3_RAT       | 0,0       | 96,7 %  | 0  | 0  | 0  |
| sp P20760 IC RAT.fasta     | 35 184,7  | 12,6 %  | 0  | 0  | 0  |
| tr Q9QZK5 Q9QZK5_RAT       | 0,0       | 100,0 % | 1  | 1  | 1  |
| sp Q9QZQ5 1 RAT.fasta      | 38 508,5  | 100,0 % | 7  | 7  | 15 |
| tr D4A5L9 D4 RAT.fasta     | 11 636,0  | 100,0 % | 0  | 0  | 0  |
| tr D3ZD09 D1 RAT.fasta     | 10 071,5  | 84,9 %  | 0  | 0  | 0  |
| sp Q00981 U RAT.fasta      | 24 838,2  | 98,6 %  | 0  | 0  | 0  |
| sp Q6QD51 C RAT.fasta      | 107 693,2 | 100,0 % | 4  | 4  | 6  |
| sp P85973 PI RAT.fasta     | 32 301,7  | 100,0 % | 6  | 6  | 6  |
| tr F1M6Q3 F RAT.fasta      | 166 252,0 | 100,0 % | 1  | 1  | 1  |
| sp Q9R063 P RAT.fasta      | 22 178,5  | 100,0 % | 1  | 1  | 1  |
| sp P30904 M RAT.fasta      | 12 477,4  | 100,0 % | 3  | 4  | 4  |
| sp Q9QXQ0 1 RAT.fasta      | 104 918,2 | 100,0 % | 11 | 11 | 20 |
| tr Q6P6G4 Q RAT.fasta      | 30 077,3  | 40,0 %  | 0  | 0  | 0  |
| sp Q5XI32 C1 RAT.fasta     | 30 629,7  | 100,0 % | 1  | 1  | 1  |
| sp P85108 T1 RAT.fasta     | 49 907,1  | 100,0 % | 3  | 3  | 3  |
| tr F1LXC0 F1 RAT.fasta     | 198 340,6 | 8,2 %   | 0  | 0  | 0  |
| sp P30120 TI RAT.fasta     | 23 794,2  | 100,0 % | 10 | 16 | 41 |
| sp P10760 S1 RAT.fasta     | 47 538,9  | 99,7 %  | 0  | 0  | 0  |
| sp Q68FS4-2 RAT.fasta      | 56 151,2  | 100,0 % | 1  | 1  | 1  |
| tr F1M8K0 F1 RAT.fasta     | 96 707,0  | 100,0 % | 2  | 2  | 3  |
| tr B2RZ72 B2 RAT.fasta     | 19 667,4  | 100,0 % | 2  | 2  | 2  |
| sp P80254 D1 RAT.fasta     | 13 133,9  | 100,0 % | 3  | 3  | 3  |

|                         |           |         |    |    |     |
|-------------------------|-----------|---------|----|----|-----|
| sp P01946 H RAT.fasta   | 15 328,7  | 100,0 % | 2  | 3  | 3   |
| tr Q7TP54 Q RAT.fasta   | 144 712,1 | 100,0 % | 5  | 9  | 22  |
| sp P09117 AI RAT.fasta  | 39 284,3  | 96,8 %  | 0  | 0  | 0   |
| sp P06761 G RAT.fasta   | 72 348,5  | 100,0 % | 1  | 1  | 1   |
| sp Q6PTT0 A RAT.fasta   | 45 822,2  | 9,2 %   | 0  | 0  | 0   |
| tr F1LQ00 F1 RAT.fasta  | 142 475,8 | 100,0 % | 46 | 63 | 198 |
| tr E9PSI7 E9F RAT.fasta | 57 166,5  | 100,0 % | 7  | 10 | 12  |
| sp P31232 T RAT.fasta   | 22 602,7  | 100,0 % | 16 | 22 | 51  |
| tr F1MAL6 F RAT.fasta   | 518 261,9 | 100,0 % | 2  | 2  | 2   |
| sp P25304-2  RAT.fasta  | 208 638,9 | 21,9 %  | 0  | 0  | 0   |
| tr Q5XI84 Q5 RAT.fasta  | 44 849,2  | 95,0 %  | 1  | 1  | 1   |
| sp Q6IG03 K RAT.fasta   | 60 388,4  | 100,0 % | 3  | 3  | 37  |
| sp P55053 F RAT.fasta   | 15 059,3  | 57,5 %  | 0  | 0  | 0   |
| tr F1M335 F RAT.fasta   | 164 854,5 | 100,0 % | 2  | 2  | 2   |
| tr F1LV50 F1 RAT.fasta  | 34 405,7  | 100,0 % | 2  | 2  | 2   |
| sp Q6IFV4 K1 RAT.fasta  | 47 730,8  | 100,0 % | 2  | 3  | 3   |
| tr Q6IFU9 Q6 RAT.fasta  | 50 777,8  | 100,0 % | 4  | 6  | 7   |
| tr D3ZAF5 D RAT.fasta   | 90 059,4  | 100,0 % | 39 | 56 | 240 |
| sp Q6B345 S RAT.fasta   | 11 065,2  | 100,0 % | 4  | 6  | 9   |
| sp O55004 R RAT.fasta   | 16 903,2  | 100,0 % | 4  | 4  | 5   |
| sp Q64119 N RAT.fasta   | 16 974,9  | 100,0 % | 1  | 1  | 2   |
| sp P08009 G RAT.fasta   | 25 682,7  | 100,0 % | 1  | 1  | 1   |
| tr Q66HI5 Q6 RAT.fasta  | 21 100,1  | 5,8 %   | 0  | 0  | 0   |
| sp P02466 C RAT.fasta   | 129 564,9 | 100,0 % | 3  | 3  | 4   |
| sp P04906 G RAT.fasta   | 23 439,8  | 100,0 % | 4  | 4  | 4   |
| sp Q62812 N RAT.fasta   | 226 343,8 | 100,0 % | 1  | 1  | 1   |
| sp P07323 E RAT.fasta   | 47 141,5  | 87,3 %  | 0  | 0  | 0   |
| tr F1M853 F RAT.fasta   | 170 987,4 | 100,0 % | 0  | 0  | 0   |
| sp Q9QX79 F RAT.fasta   | 41 532,1  | 14,2 %  | 0  | 0  | 0   |
| sp P50398 G RAT.fasta   | 50 538,2  | 48,1 %  | 0  | 0  | 0   |
| tr D4A5L9 D RAT.fasta   | 11 636,0  | 87,3 %  | 0  | 0  | 0   |
| tr F1LRX5 F1LRX5_RAT    | 0,0       | 97,2 %  | 0  | 0  | 0   |
| sp Q6IG00 K RAT.fasta   | 57 668,2  | 100,0 % | 2  | 2  | 2   |
| tr F1M853 F RAT.fasta   | 170 987,4 | 6,6 %   | 0  | 0  | 0   |
| sp Q6P7B4 F RAT.fasta   | 58 207,2  | 100,0 % | 3  | 3  | 3   |
| tr D3ZUM4 C RAT.fasta   | 73 231,2  | 100,0 % | 2  | 2  | 2   |
| sp P21961 CBPA3_RAT-DE  | 0,0       | 100,0 % | 2  | 2  | 2   |
| tr D3ZD09 D RAT.fasta   | 10 071,5  | 8,8 %   | 0  | 0  | 0   |
| tr D3ZQ74 D RAT.fasta   | 83 615,3  | 100,0 % | 2  | 2  | 2   |
| sp P04797 G RAT.fasta   | 35 828,1  | 100,0 % | 1  | 1  | 1   |
| tr D3ZTX4 D3ZTX4_RAT-DE | 0,0       | 100,0 % | 2  | 2  | 2   |
| tr D3ZXM9 D RAT.fasta   | 131 885,3 | 97,5 %  | 1  | 1  | 1   |
| sp P04937 FI RAT.fasta  | 272 503,7 | 100,0 % | 2  | 2  | 4   |
| tr F1LXC0 F1 RAT.fasta  | 198 340,6 | 100,0 % | 2  | 2  | 2   |
| sp P04904 G RAT.fasta   | 25 320,4  | 99,5 %  | 1  | 1  | 1   |
| sp Q01177 P RAT.fasta   | 90 535,1  | 99,5 %  | 1  | 1  | 1   |
| sp Q00959 NMDE1_RAT-D   | 0,0       | 100,0 % | 2  | 2  | 2   |
| sp Q63202 A RAT.fasta   | 82 310,9  | 100,0 % | 2  | 2  | 2   |
| sp P20760 IC RAT.fasta  | 35 184,7  | 85,5 %  | 0  | 0  | 0   |
| sp P11442 CI RAT.fasta  | 0,0       | 40,9 %  | 0  | 0  | 0   |
| sp Q6P6V0 G RAT.fasta   | 62 829,3  | 100,0 % | 2  | 2  | 3   |



|                                     |           |         |    |    |     |
|-------------------------------------|-----------|---------|----|----|-----|
| tr Q9JKB7 Q <sub>5</sub> RAT.fasta  | 50 901,6  | 97,5 %  | 1  | 1  | 1   |
| sp Q68FP1-2 RAT.fasta               | 86 067,9  | 99,5 %  | 1  | 1  | 1   |
| tr D3Z8P5 D <sub>3</sub> RAT.fasta  | 35 269,8  | 73,2 %  | 0  | 0  | 0   |
| sp B0BNI5 O <sub>1</sub> RAT.fasta  | 45 962,3  | 100,0 % | 2  | 2  | 3   |
| tr B2GV03 B2GV03_RAT                | 0,0       | 22,3 %  | 0  | 0  | 0   |
| tr F1M6Q3 F RAT.fasta               | 166 252,0 | 100,0 % | 2  | 2  | 3   |
| tr Q9QX80 Q RAT.fasta               | 30 853,6  | 7,3 %   | 0  | 0  | 0   |
| sp Q64119 N RAT.fasta               | 16 974,9  | 100,0 % | 3  | 3  | 3   |
| sp P14046 A <sub>1</sub> RAT.fasta  | 163 774,4 | 100,0 % | 1  | 2  | 2   |
| sp P55053 F <sub>1</sub> RAT.fasta  | 15 059,3  | 99,5 %  | 1  | 1  | 2   |
| sp Q6P7S1 A RAT.fasta               | 44 444,6  | 100,0 % | 2  | 2  | 2   |
| tr E9PSN2 E9 RAT.fasta              | 0,0       | 100,0 % | 2  | 2  | 2   |
| sp P19944 RI RAT.fasta              | 11 498,1  | 99,5 %  | 1  | 1  | 2   |
| sp P35053 G RAT.fasta               | 61 735,5  | 100,0 % | 8  | 8  | 9   |
| tr Q5M7T5 C RAT.fasta               | 52 235,3  | 100,0 % | 2  | 2  | 2   |
| sp P62630 E <sub>1</sub> RAT.fasta  | 50 114,2  | 100,0 % | 4  | 4  | 5   |
| sp A2RUV9 A RAT.fasta               | 128 063,7 | 100,0 % | 14 | 15 | 26  |
| tr D4A856 D4A856_RAT                | 0,0       | 62,0 %  | 0  | 0  | 0   |
| sp Q62812 N RAT.fasta               | 226 343,8 | 100,0 % | 2  | 2  | 3   |
| sp P16975 S <sub>1</sub> RAT.fasta  | 34 295,7  | 100,0 % | 15 | 24 | 58  |
| tr Q642B0 Q <sub>1</sub> RAT.fasta  | 62 563,0  | 100,0 % | 3  | 3  | 3   |
| sp Q01129 P RAT.fasta               | 39 806,8  | 100,0 % | 3  | 3  | 4   |
| sp P08494 M RAT.fasta               | 12 037,1  | 100,0 % | 2  | 2  | 4   |
| sp P55051 F <sub>1</sub> RAT.fasta  | 14 863,7  | 99,5 %  | 1  | 1  | 1   |
| sp P62963 P <sub>1</sub> RAT.fasta  | 14 957,3  | 100,0 % | 6  | 7  | 8   |
| sp P63102 1 <sub>1</sub> RAT.fasta  | 27 771,9  | 100,0 % | 2  | 2  | 2   |
| tr D3Z9F8 D <sub>3</sub> RAT.fasta  | 212 445,0 | 100,0 % | 67 | 83 | 134 |
| sp Q63416 I <sub>1</sub> RAT.fasta  | 99 099,5  | 95,6 %  | 1  | 1  | 1   |
| sp P05708 H <sub>1</sub> RAT.fasta  | 102 411,0 | 9,7 %   | 0  | 0  | 0   |
| sp P13697 M RAT.fasta               | 64 004,3  | 9,1 %   | 0  | 0  | 0   |
| tr F1LUQ1 F1LUQ1_RAT                | 0,0       | 52,0 %  | 0  | 0  | 0   |
| tr D3ZY51 D <sub>3</sub> RAT.fasta  | 67 218,5  | 99,5 %  | 1  | 1  | 1   |
| sp Q05982 N RAT.fasta               | 17 193,0  | 100,0 % | 1  | 1  | 1   |
| tr D3ZP82 D <sub>3</sub> RAT.fasta  | 83 627,0  | 100,0 % | 4  | 5  | 5   |
| sp P63029 T <sub>1</sub> RAT.fasta  | 19 462,9  | 15,8 %  | 0  | 0  | 0   |
| tr F1M798 F <sub>1</sub> RAT.fasta  | 111 649,0 | 100,0 % | 3  | 3  | 3   |
| sp Q9WUQ1 RAT.fasta                 | 105 705,8 | 99,5 %  | 1  | 1  | 1   |
| sp O88989 N RAT.fasta               | 36 483,9  | 100,0 % | 2  | 2  | 3   |
| sp P04764 E <sub>1</sub> RAT.fasta  | 47 129,0  | 100,0 % | 8  | 10 | 10  |
| tr F1LP57 F1 <sub>1</sub> RAT.fasta | 41 102,6  | 100,0 % | 2  | 2  | 2   |
| sp Q99PW7 I <sub>1</sub> RAT.fasta  | 27 107,4  | 99,9 %  | 1  | 1  | 1   |
| tr Q9JI04 Q9 <sub>1</sub> RAT.fasta | 171 575,7 | 100,0 % | 6  | 7  | 9   |
| sp P23565 A <sub>1</sub> RAT.fasta  | 56 116,7  | 11,7 %  | 0  | 0  | 0   |
| sp P36953 A <sub>1</sub> RAT.fasta  | 69 336,5  | 59,9 %  | 0  | 0  | 0   |
| sp P30121 T <sub>1</sub> RAT.fasta  | 24 357,0  | 100,0 % | 9  | 12 | 22  |
| tr D4A115 D <sub>4</sub> RAT.fasta  | 240 199,7 | 100,0 % | 13 | 13 | 14  |
| sp Q63716 P RAT.fasta               | 22 110,2  | 97,3 %  | 1  | 1  | 1   |
| tr Q7TQ25 Q7TQ25_RAT                | 0,0       | 39,9 %  | 0  | 0  | 0   |
| tr Q3MIE4 Q3MIE4_RAT                | 0,0       | 97,5 %  | 1  | 1  | 2   |
| sp P04642 L <sub>1</sub> RAT.fasta  | 36 450,8  | 100,0 % | 3  | 3  | 3   |
| sp Q9R1E9 C RAT.fasta               | 37 755,2  | 100,0 % | 10 | 11 | 24  |

|                         |           |         |    |     |     |
|-------------------------|-----------|---------|----|-----|-----|
| tr Q5U2V1 Q RAT.fasta   | 64 788,7  | 100,0 % | 7  | 8   | 11  |
| tr F1MAL6 F: RAT.fasta  | 518 261,9 | 96,1 %  | 0  | 0   | 0   |
| sp P10111 PI RAT.fasta  | 17 874,8  | 100,0 % | 3  | 4   | 4   |
| sp Q9JI85 NL RAT.fasta  | 50 091,2  | 100,0 % | 3  | 4   | 5   |
| sp P11762 LE RAT.fasta  | 14 857,2  | 100,0 % | 4  | 5   | 6   |
| sp P05065 AI RAT.fasta  | 39 352,6  | 100,0 % | 6  | 6   | 9   |
| tr F1M566 F: RAT.fasta  | 230 834,3 | 100,0 % | 12 | 12  | 17  |
| sp P47709 RI RAT.fasta  | 75 833,3  | 71,5 %  | 0  | 0   | 0   |
| sp Q4FZU2 K RAT.fasta   | 59 250,6  | 100,0 % | 4  | 4   | 12  |
| sp P34058 H: RAT.fasta  | 83 284,3  | 99,5 %  | 1  | 1   | 1   |
| sp P24090 FE RAT.fasta  | 37 981,1  | 90,8 %  | 0  | 0   | 0   |
| sp P01026 CI RAT.fasta  | 186 462,2 | 100,0 % | 3  | 3   | 3   |
| sp P47853 PI RAT.fasta  | 41 708,6  | 100,0 % | 16 | 24  | 34  |
| sp P62161 C/ RAT.fasta  | 16 838,0  | 100,0 % | 2  | 3   | 3   |
| tr F1LP60 F1I RAT.fasta | 67 653,6  | 100,0 % | 11 | 11  | 13  |
| sp P07151 B: RAT.fasta  | 13 720,0  | 100,0 % | 2  | 3   | 4   |
| sp Q08420 S: RAT.fasta  | 26 619,3  | 100,0 % | 3  | 5   | 6   |
| sp P24268 C/ RAT.fasta  | 44 682,0  | 100,0 % | 2  | 2   | 2   |
| tr F1LUH9 F1LUH9_RAT    | 0,0       | 100,0 % | 2  | 2   | 3   |
| tr Q6IFU9 Q: RAT.fasta  | 50 777,8  | 100,0 % | 2  | 3   | 5   |
| tr F1MAF7 F: RAT.fasta  | 46 837,1  | 18,8 %  | 0  | 0   | 0   |
| sp Q5RJP7 PI RAT.fasta  | 41 932,9  | 100,0 % | 5  | 5   | 5   |
| tr D3ZQM5 D3ZQM5_RAT    | 0,0       | 100,0 % | 23 | 24  | 31  |
| tr D4A7Y1 D: RAT.fasta  | 224 612,0 | 100,0 % | 21 | 23  | 37  |
| sp P25113 PI RAT.fasta  | 28 832,8  | 99,5 %  | 1  | 1   | 1   |
| sp P02262 H: RAT.fasta  | 14 078,0  | 100,0 % | 2  | 2   | 3   |
| sp P68370 TI RAT.fasta  | 50 135,7  | 99,5 %  | 1  | 1   | 1   |
| tr D3ZQN7 D RAT.fasta   | 202 784,2 | 93,4 %  | 1  | 1   | 1   |
| sp Q6IG05 K: RAT.fasta  | 59 027,2  | 7,0 %   | 0  | 0   | 0   |
| tr D3ZK12 D3ZK12_RAT    | 0,0       | 100,0 % | 3  | 3   | 6   |
| sp P20909 CI RAT.fasta  | 181 029,5 | 99,5 %  | 1  | 1   | 1   |
| tr F1LR02 F1 RAT.fasta  | 134 646,3 | 6,8 %   | 0  | 0   | 0   |
| sp Q62611-2 RAT.fasta   | 64 406,5  | 100,0 % | 4  | 4   | 4   |
| sp Q5FVH0 C RAT.fasta   | 25 334,7  | 100,0 % | 2  | 2   | 2   |
| tr Q6IN22 Q: RAT.fasta  | 37 544,1  | 100,0 % | 7  | 8   | 12  |
| tr D3ZQ25 D: RAT.fasta  | 78 070,0  | 100,0 % | 3  | 3   | 4   |
| tr D3ZDF6 D3ZDF6_RAT    | 0,0       | 99,4 %  | 1  | 1   | 2   |
| sp P47819 G RAT.fasta   | 49 957,9  | 100,0 % | 2  | 3   | 5   |
| sp P51886 LI RAT.fasta  | 38 281,3  | 100,0 % | 10 | 12  | 21  |
| sp Q6IFU8 K: RAT.fasta  | 48 123,9  | 100,0 % | 5  | 5   | 14  |
| sp P48500 TI RAT.fasta  | 26 848,7  | 100,0 % | 4  | 4   | 4   |
| sp Q2Q019 FI RAT.fasta  | 194 048,8 | 100,0 % | 12 | 13  | 15  |
| sp Q88767 P. RAT.fasta  | 19 974,3  | 99,5 %  | 1  | 2   | 3   |
| sp Q63041 A RAT.fasta   | 167 126,0 | 99,5 %  | 1  | 1   | 1   |
| sp P97546-3 RAT.fasta   | 43 932,2  | 8,8 %   | 0  | 0   | 0   |
| sp Q6P0K8 P RAT.fasta   | 81 801,9  | 100,0 % | 6  | 6   | 6   |
| sp P0CG51 U RAT.fasta   | 14 728,9  | 99,0 %  | 1  | 1   | 1   |
| tr D3ZFH5 D: RAT.fasta  | 106 528,4 | 100,0 % | 2  | 2   | 4   |
| sp P02454 CI RAT.fasta  | 137 953,8 | 100,0 % | 87 | 133 | 456 |
| tr F1LNN9 F1LNN9_RAT    | 0,0       | 100,0 % | 3  | 3   | 5   |
| sp P31232 T/ RAT.fasta  | 22 602,7  | 100,0 % | 8  | 9   | 12  |

|                         |           |         |    |     |     |
|-------------------------|-----------|---------|----|-----|-----|
| sp P70490 M RAT.fasta   | 47 413,4  | 100,0 % | 6  | 6   | 6   |
| sp Q00918 L RAT.fasta   | 186 590,5 | 100,0 % | 4  | 4   | 6   |
| sp P23785 G RAT.fasta   | 63 366,6  | 100,0 % | 7  | 7   | 12  |
| tr D3ZHA0 D RAT.fasta   | 290 978,7 | 95,1 %  | 0  | 0   | 0   |
| sp Q63772 G RAT.fasta   | 74 637,2  | 100,0 % | 3  | 3   | 3   |
| sp P06687 A RAT.fasta   | 111 694,4 | 9,4 %   | 0  | 0   | 0   |
| sp O35276 N RAT.fasta   | 103 899,5 | 99,5 %  | 1  | 1   | 1   |
| sp Q6B345 S RAT.fasta   | 11 065,2  | 100,0 % | 2  | 2   | 2   |
| tr Q8CHN5 C RAT.fasta   | 16 363,9  | 99,9 %  | 1  | 1   | 4   |
| tr F1LST1 F1I RAT.fasta | 202 546,0 | 100,0 % | 91 | 132 | 265 |
| sp P16636 LY RAT.fasta  | 46 558,9  | 100,0 % | 2  | 2   | 4   |
| sp P85972 VI RAT.fasta  | 116 617,3 | 100,0 % | 7  | 7   | 11  |
| tr C0JPT7 C0 RAT.fasta  | 280 485,3 | 100,0 % | 18 | 19  | 26  |
| sp P07150 AI RAT.fasta  | 38 831,0  | 100,0 % | 2  | 2   | 2   |
| sp P31000 VI RAT.fasta  | 53 733,9  | 100,0 % | 17 | 17  | 29  |
| sp P14841 C RAT.fasta   | 15 436,8  | 100,0 % | 4  | 5   | 10  |
| sp P51635 AI RAT.fasta  | 36 506,2  | 98,7 %  | 1  | 1   | 1   |
| sp P62804 H RAT.fasta   | 11 367,7  | 100,0 % | 2  | 2   | 2   |
| sp P01946 H RAT.fasta   | 15 328,7  | 11,6 %  | 0  | 0   | 0   |
| tr D3ZAF5 D RAT.fasta   | 90 059,4  | 100,0 % | 41 | 67  | 107 |
| sp P02466 C RAT.fasta   | 129 564,9 | 99,6 %  | 1  | 1   | 1   |
| sp P00762 Tf RAT.fasta  | 25 959,1  | 100,0 % | 3  | 5   | 7   |
| sp Q9WVH8  RAT.fasta    | 50 159,8  | 100,0 % | 4  | 4   | 6   |
| sp P30120 TI RAT.fasta  | 23 794,2  | 100,0 % | 8  | 9   | 13  |
| sp Q9QZQ5 ↑ RAT.fasta   | 38 508,5  | 100,0 % | 3  | 3   | 4   |
| sp P85973 PI RAT.fasta  | 32 301,7  | 47,7 %  | 0  | 0   | 0   |
| sp P05539 C RAT.fasta   | 134 572,0 | 100,0 % | 4  | 4   | 10  |
| sp P30904 M RAT.fasta   | 12 477,4  | 99,5 %  | 1  | 1   | 1   |
| sp P62738 A RAT.fasta   | 42 010,1  | 100,0 % | 8  | 11  | 16  |
| tr F1LTF8 F1I RAT.fasta | 195 626,6 | 93,7 %  | 0  | 0   | 0   |
| tr D4A645 D4A645_RAT-DE | 0,0       | 100,0 % | 2  | 2   | 2   |
| sp P50399 G RAT.fasta   | 50 539,1  | 100,0 % | 4  | 4   | 5   |
| sp P07632 S RAT.fasta   | 15 910,7  | 100,0 % | 2  | 2   | 5   |
| sp P31044 PI RAT.fasta  | 20 801,4  | 99,9 %  | 1  | 1   | 1   |
| sp P02650 AI RAT.fasta  | 35 753,4  | 99,5 %  | 1  | 1   | 1   |
| sp Q6IFU7 K RAT.fasta   | 50 214,0  | 99,5 %  | 1  | 1   | 1   |
| sp P20961 P RAT.fasta   | 45 010,6  | 100,0 % | 17 | 23  | 42  |
| tr D4ADG9 D RAT.fasta   | 66 931,9  | 100,0 % | 3  | 3   | 3   |
| sp Q99MZ8 I RAT.fasta   | 29 969,9  | 89,0 %  | 0  | 0   | 0   |
| sp P18418 C RAT.fasta   | 47 997,0  | 72,2 %  | 0  | 0   | 0   |
| sp P07154 C RAT.fasta   | 37 660,6  | 100,0 % | 3  | 4   | 9   |
| sp Q5RKI0 W RAT.fasta   | 66 181,1  | 44,6 %  | 0  | 0   | 0   |
| sp Q6IG01 K RAT.fasta   | 57 256,1  | 6,9 %   | 0  | 0   | 0   |
| tr Q9ES33 Q RAT.fasta   | 30 762,0  | 100,0 % | 7  | 8   | 12  |
| tr D3ZF59 D3ZF59_RAT    | 0,0       | 100,0 % | 6  | 6   | 8   |
| sp Q6IG03 K RAT.fasta   | 60 388,4  | 100,0 % | 2  | 2   | 8   |
| sp P62260 1 RAT.fasta   | 29 175,0  | 100,0 % | 2  | 2   | 2   |
| sp Q6P6Q2 K RAT.fasta   | 61 827,3  | 100,0 % | 13 | 14  | 27  |
| tr Q5XI84 Q5 RAT.fasta  | 44 849,2  | 100,0 % | 2  | 2   | 3   |
| sp Q9R0D6 T RAT.fasta   | 47 421,5  | 100,0 % | 1  | 1   | 1   |
| tr F1LNH3 F1I RAT.fasta | 109 660,6 | 100,0 % | 5  | 6   | 6   |

|                            |           |         |    |    |     |
|----------------------------|-----------|---------|----|----|-----|
| sp O55004 R RAT.fasta      | 16 903,2  | 100,0 % | 2  | 2  | 3   |
| tr Q6IFZ5 Q6 RAT.fasta     | 61 759,6  | 99,6 %  | 1  | 1  | 1   |
| tr D4A185 D4A185_RAT       | 0,0       | 100,0 % | 2  | 2  | 2   |
| tr D3ZQR7 D RAT.fasta      | 87 014,0  | 100,0 % | 13 | 15 | 19  |
| sp Q6QD51 C RAT.fasta      | 107 693,2 | 100,0 % | 9  | 9  | 10  |
| tr F1LRL9 F1I RAT.fasta    | 269 643,4 | 97,5 %  | 1  | 1  | 1   |
| sp Q5U300 L RAT.fasta      | 117 788,8 | 52,6 %  | 0  | 0  | 0   |
| sp P09495 Tf RAT.fasta     | 28 510,4  | 100,0 % | 4  | 4  | 8   |
| sp P06238 A RAT.fasta      | 163 785,7 | 99,5 %  | 1  | 1  | 3   |
| tr D3ZUL3 D RAT.fasta      | 108 807,3 | 100,0 % | 7  | 7  | 10  |
| tr F1LRZ7 F1I RAT.fasta    | 114 411,8 | 12,7 %  | 0  | 0  | 0   |
| tr F1LRR0 F1LRR0_RAT, tr F | 0,0       | 100,0 % | 13 | 16 | 24  |
| sp P12346 Tf RAT.fasta     | 76 395,6  | 54,9 %  | 0  | 0  | 0   |
| sp P19804 N RAT.fasta      | 17 283,3  | 100,0 % | 1  | 2  | 2   |
| sp O08628 P RAT.fasta      | 50 185,1  | 100,0 % | 16 | 21 | 35  |
| tr F1LM84 F1 RAT.fasta     | 137 037,9 | 100,0 % | 14 | 16 | 30  |
| sp P01830 Tf RAT.fasta     | 18 172,8  | 100,0 % | 1  | 1  | 1   |
| sp P63018 H RAT.fasta      | 70 872,8  | 100,0 % | 3  | 3  | 3   |
| sp P24368 P RAT.fasta      | 23 802,9  | 100,0 % | 1  | 1  | 1   |
| tr D3ZM43 D3ZM43_RAT       | 0,0       | 100,0 % | 2  | 2  | 2   |
| sp O35793 G RAT.fasta      | 20 680,0  | 100,0 % | 2  | 2  | 3   |
| sp Q7M0E3 I RAT.fasta      | 18 534,1  | 100,0 % | 2  | 2  | 2   |
| tr D4A2G6 D RAT.fasta      | 129 725,6 | 100,0 % | 30 | 38 | 66  |
| sp P62329 T RAT.fasta      | 5 052,9   | 100,0 % | 2  | 3  | 5   |
| tr Q7TP54 Q RAT.fasta      | 144 712,1 | 100,0 % | 2  | 3  | 3   |
| sp Q00715 H RAT.fasta      | 13 990,6  | 99,9 %  | 1  | 1  | 2   |
| sp Q6AY61 P RAT.fasta      | 43 161,1  | 100,0 % | 3  | 3  | 3   |
| sp P05197 E RAT.fasta      | 95 286,0  | 100,0 % | 3  | 3  | 3   |
| sp Q63083 N RAT.fasta      | 53 506,9  | 100,0 % | 10 | 10 | 11  |
| tr F1LM30 F1 RAT.fasta     | 51 745,4  | 78,9 %  | 0  | 0  | 0   |
| sp P39069 K RAT.fasta      | 21 584,4  | 48,9 %  | 0  | 0  | 0   |
| sp Q5U2Q3 C RAT.fasta      | 34 992,9  | 36,3 %  | 0  | 0  | 0   |
| tr F1LSW0 F1LSW0_RAT       | 0,0       | 100,0 % | 15 | 17 | 26  |
| sp Q63434 P RAT.fasta      | 17 681,3  | 100,0 % | 3  | 3  | 3   |
| tr D3ZPA9 D3ZPA9_RAT       | 0,0       | 100,0 % | 8  | 10 | 12  |
| sp P02091 H RAT.fasta      | 15 979,4  | 99,5 %  | 1  | 1  | 1   |
| sp Q07258 T RAT.fasta      | 47 116,4  | 99,5 %  | 1  | 1  | 2   |
| sp Q6IFW6 K RAT.fasta      | 56 506,5  | 100,0 % | 13 | 20 | 49  |
| tr D3ZWH0 D3ZWH0_RAT-I     | 0,0       | 97,8 %  | 0  | 0  | 0   |
| tr F1LV50 F1 RAT.fasta     | 34 405,7  | 99,5 %  | 1  | 1  | 4   |
| sp O88201 C RAT.fasta      | 36 387,5  | 100,0 % | 2  | 2  | 2   |
| sp Q6Q0N0 C RAT.fasta      | 106 259,2 | 100,0 % | 2  | 2  | 2   |
| tr D4AC70 D RAT.fasta      | 73 452,3  | 99,9 %  | 1  | 1  | 1   |
| tr A7M777 A7M777_RAT       | 0,0       | 97,5 %  | 1  | 1  | 1   |
| sp P47942 D RAT.fasta      | 62 277,9  | 10,4 %  | 0  | 0  | 0   |
| sp P13941 C RAT.fasta      | 138 936,9 | 100,0 % | 48 | 63 | 162 |
| tr B5DF94 B5DF94_RAT, tr   | 0,0       | 100,0 % | 2  | 2  | 2   |
| sp Q6IFV1 K1 RAT.fasta     | 52 684,9  | 100,0 % | 6  | 9  | 16  |
| sp Q62658 F RAT.fasta      | 11 922,7  | 99,5 %  | 1  | 1  | 1   |
| tr F8WG88 F RAT.fasta      | 60 600,9  | 100,0 % | 12 | 17 | 34  |
| sp Q9JI03 CC RAT.fasta     | 183 990,1 | 100,0 % | 19 | 29 | 47  |

|                         |           |         |    |     |     |
|-------------------------|-----------|---------|----|-----|-----|
| tr F1LS40 F1I RAT.fasta | 129 838,5 | 100,0 % | 81 | 120 | 347 |
| sp P61983 14 RAT.fasta  | 28 303,1  | 99,5 %  | 1  | 1   | 1   |
| sp P07722 M RAT.fasta   | 69 352,9  | 97,9 %  | 0  | 0   | 0   |
| sp Q00981 U RAT.fasta   | 24 838,2  | 100,0 % | 2  | 2   | 2   |
| sp P05982 N RAT.fasta   | 30 947,5  | 99,9 %  | 1  | 1   | 2   |
| tr F1M8K0 F: RAT.fasta  | 96 707,0  | 94,4 %  | 1  | 1   | 1   |
| sp P82995 H: RAT.fasta  | 84 818,3  | 97,5 %  | 1  | 1   | 1   |
| sp P68255 14 RAT.fasta  | 27 779,4  | 99,5 %  | 1  | 1   | 1   |
| sp P33436 M RAT.fasta   | 74 151,7  | 100,0 % | 20 | 26  | 35  |
| sp Q6P9V9 T RAT.fasta   | 50 151,7  | 100,0 % | 1  | 1   | 1   |
| sp Q6IFV4 K1 RAT.fasta  | 47 730,8  | 100,0 % | 2  | 2   | 3   |
| sp P08649 C( RAT.fasta  | 192 164,5 | 99,5 %  | 1  | 1   | 1   |
| sp Q5XI73 GI RAT.fasta  | 23 408,0  | 100,0 % | 3  | 3   | 4   |
| sp P04276 V RAT.fasta   | 53 545,6  | 65,1 %  | 0  | 0   | 0   |
| tr F1M8G9 F RAT.fasta   | 91 166,5  | 5,0 %   | 0  | 0   | 0   |
| tr F1LPD0 F1 RAT.fasta  | 0,0       | 100,0 % | 2  | 2   | 3   |
| sp P18331 IN RAT.fasta  | 47 406,9  | 100,0 % | 3  | 3   | 5   |
| tr Q5RJR9 Q: RAT.fasta  | 46 563,0  | 100,0 % | 1  | 1   | 1   |
| sp P47875 C: RAT.fasta  | 20 613,2  | 100,0 % | 3  | 3   | 6   |
| sp Q6IMF3 K RAT.fasta   | 64 831,7  | 100,0 % | 6  | 10  | 32  |
| sp P06761 G RAT.fasta   | 72 348,5  | 100,0 % | 4  | 4   | 6   |
| sp Q9R063 P RAT.fasta   | 22 178,5  | 96,3 %  | 1  | 1   | 1   |
| tr Q9QZK5 Q9QZK5_RAT    | 0,0       | 100,0 % | 2  | 2   | 3   |
| sp Q9QXQ0 / RAT.fasta   | 104 918,2 | 100,0 % | 14 | 15  | 26  |
| tr F1M335 F: RAT.fasta  | 164 854,5 | 100,0 % | 2  | 2   | 2   |
| tr E9PSV0 E9PSV0_RAT    | 0,0       | 100,0 % | 1  | 1   | 2   |
| sp Q07257-2 RAT.fasta   | 50 535,3  | 100,0 % | 3  | 3   | 7   |
| sp P05371 CI RAT.fasta  | 51 375,6  | 97,1 %  | 0  | 0   | 0   |
| tr F1LMV6 F: RAT.fasta  | 332 400,6 | 100,0 % | 7  | 9   | 10  |
| sp P58775-2 RAT.fasta   | 32 958,6  | 100,0 % | 7  | 7   | 7   |
| sp P85108 Ti RAT.fasta  | 49 907,1  | 99,5 %  | 1  | 1   | 1   |
| tr F1M7P4 F: RAT.fasta  | 53 983,3  | 22,0 %  | 0  | 0   | 0   |
| tr Q3MID6 Q RAT.fasta   | 37 148,8  | 100,0 % | 5  | 7   | 16  |
| sp P10960 S/ RAT.fasta  | 61 122,8  | 100,0 % | 6  | 7   | 9   |
| tr B1WC91 B RAT.fasta   | 35 043,1  | 100,0 % | 1  | 1   | 1   |
| tr F1LS57 F1I RAT.fasta | 125 961,6 | 100,0 % | 7  | 7   | 11  |
| sp Q9EPB1 D RAT.fasta   | 55 115,3  | 100,0 % | 4  | 4   | 4   |
| tr F1LPM2 F1LPM2_RAT    | 0,0       | 100,0 % | 2  | 2   | 3   |
| sp Q9Z1P2 A RAT.fasta   | 102 963,9 | 100,0 % | 6  | 6   | 9   |
| sp P12839 N RAT.fasta   | 95 790,7  | 96,9 %  | 1  | 1   | 1   |
| sp P42123 LI RAT.fasta  | 36 612,5  | 99,5 %  | 1  | 1   | 1   |
| sp Q6AY84 S RAT.fasta   | 46 396,0  | 11,0 %  | 0  | 0   | 0   |
| tr F1M9B2 F: RAT.fasta  | 28 948,7  | 100,0 % | 10 | 14  | 25  |
| sp Q07936 A RAT.fasta   | 38 680,2  | 100,0 % | 3  | 3   | 3   |
| sp P02770 AI RAT.fasta  | 68 731,2  | 100,0 % | 2  | 2   | 5   |
| sp P16617 P( RAT.fasta  | 44 539,1  | 99,0 %  | 1  | 1   | 1   |
| sp Q63610 T RAT.fasta   | 29 007,2  | 100,0 % | 2  | 2   | 2   |
| sp P45592 C( RAT.fasta  | 18 533,2  | 100,0 % | 3  | 3   | 3   |
| sp P08721 O RAT.fasta   | 34 962,7  | 100,0 % | 7  | 8   | 14  |
| tr D4A0Y1 D4A0Y1_RAT    | 0,0       | 100,0 % | 4  | 4   | 4   |
| tr Q6AYQ9 Q RAT.fasta   | 23 009,6  | 100,0 % | 5  | 6   | 7   |

|                         |           |         |    |    |     |
|-------------------------|-----------|---------|----|----|-----|
| tr F1LQ00 F1 RAT.fasta  | 142 475,8 | 100,0 % | 39 | 49 | 121 |
| sp P60711 A RAT.fasta   | 41 737,8  | 100,0 % | 13 | 22 | 38  |
| sp Q9R0J8 LC RAT.fasta  | 49 465,8  | 100,0 % | 2  | 2  | 2   |
| tr F1MA59 F RAT.fasta   | 160 614,4 | 100,0 % | 5  | 7  | 8   |
| tr F1MAA7 F RAT.fasta   | 177 385,1 | 100,0 % | 2  | 2  | 2   |
| sp Q6IG02 K RAT.fasta   | 69 127,7  | 100,0 % | 4  | 7  | 16  |
| sp P07323 EI RAT.fasta  | 47 141,5  | 100,0 % | 2  | 2  | 2   |
| tr D3ZRK9 D RAT.fasta   | 0,0       | 100,0 % | 2  | 2  | 4   |
| sp P04692-3 RAT.fasta   | 32 682,0  | 100,0 % | 2  | 2  | 2   |
| sp Q9ERB4-2 RAT.fasta   | 300 004,9 | 96,3 %  | 1  | 1  | 1   |
| tr B2RYM3 B RAT.fasta   | 100 589,7 | 100,0 % | 3  | 3  | 3   |
| tr F1LYE8 F1LYE8_RAT    | 0,0       | 100,0 % | 2  | 2  | 2   |
| sp P24090 FI RAT.fasta  | 37 981,1  | 100,0 % | 15 | 23 | 35  |
| sp Q63560 IV RAT.fasta  | 100 484,2 | 100,0 % | 5  | 5  | 12  |
| sp P10760 S RAT.fasta   | 47 538,9  | 100,0 % | 4  | 4  | 4   |
| sp Q5U2Q3 C RAT.fasta   | 34 992,9  | 100,0 % | 3  | 3  | 3   |
| sp P07722 M RAT.fasta   | 69 352,9  | 100,0 % | 7  | 10 | 13  |
| tr B2RZ27 B2 RAT.fasta  | 10 476,8  | 100,0 % | 2  | 3  | 3   |
| tr F1LM42 F1 RAT.fasta  | 434 346,5 | 100,0 % | 2  | 2  | 2   |
| sp P13221 A RAT.fasta   | 46 429,5  | 100,0 % | 15 | 20 | 30  |
| sp Q5FVJ0-2 RAT.fasta   | 52 909,0  | 100,0 % | 2  | 2  | 2   |
| sp P35704 PI RAT.fasta  | 21 784,1  | 100,0 % | 10 | 11 | 20  |
| sp P42123 LI RAT.fasta  | 36 612,5  | 100,0 % | 20 | 27 | 43  |
| tr D4A856 D4A856_RAT    | 0,0       | 100,0 % | 2  | 2  | 2   |
| sp P18418 C RAT.fasta   | 47 997,0  | 100,0 % | 5  | 5  | 6   |
| tr D4A111 D RAT.fasta   | 306 150,3 | 100,0 % | 3  | 3  | 4   |
| sp Q9JLJ3 AL RAT.fasta  | 53 653,2  | 100,0 % | 2  | 2  | 3   |
| tr F1LPD0 F1 RAT.fasta  | 0,0       | 98,7 %  | 1  | 1  | 1   |
| sp Q920J4 T RAT.fasta   | 32 249,5  | 100,0 % | 5  | 5  | 6   |
| sp Q5RKI0 W RAT.fasta   | 66 181,1  | 100,0 % | 5  | 5  | 8   |
| sp P47728 C RAT.fasta   | 31 406,7  | 100,0 % | 3  | 3  | 3   |
| tr D3ZQP6 D RAT.fasta   | 75 143,5  | 100,0 % | 2  | 3  | 7   |
| sp P25113 P RAT.fasta   | 28 832,8  | 100,0 % | 12 | 16 | 25  |
| sp P04797 G RAT.fasta   | 35 828,1  | 100,0 % | 11 | 14 | 25  |
| sp P20760 IC RAT.fasta  | 35 184,7  | 100,0 % | 17 | 25 | 73  |
| sp Q6IG05 K RAT.fasta   | 59 027,2  | 28,2 %  | 0  | 0  | 0   |
| tr F1LQ11 F1I RAT.fasta | 34 157,9  | 100,0 % | 2  | 2  | 3   |
| tr Q5M7T5 C RAT.fasta   | 52 235,3  | 100,0 % | 3  | 3  | 5   |
| sp Q6PTT0 A RAT.fasta   | 45 822,2  | 100,0 % | 2  | 2  | 2   |
| sp P47819 G RAT.fasta   | 49 957,9  | 100,0 % | 26 | 32 | 64  |
| sp Q64240 A RAT.fasta   | 38 851,4  | 100,0 % | 3  | 3  | 6   |
| sp Q6IG01 K RAT.fasta   | 57 256,1  | 5,4 %   | 0  | 0  | 0   |
| tr D3ZXM9 D RAT.fasta   | 131 885,3 | 100,0 % | 3  | 3  | 3   |
| tr F1M7P4 F RAT.fasta   | 53 983,3  | 100,0 % | 2  | 3  | 4   |
| sp Q63041 A RAT.fasta   | 167 126,0 | 100,0 % | 32 | 39 | 71  |
| sp Q64361 L RAT.fasta   | 25 579,1  | 100,0 % | 5  | 6  | 11  |
| sp B0BND0 E RAT.fasta   | 50 702,6  | 100,0 % | 9  | 10 | 10  |
| sp P04905 G RAT.fasta   | 25 915,9  | 100,0 % | 3  | 3  | 3   |
| sp Q63945 S RAT.fasta   | 33 406,4  | 100,0 % | 2  | 2  | 2   |
| sp P12839 N RAT.fasta   | 95 790,7  | 100,0 % | 42 | 54 | 86  |
| tr F1MAL6 F RAT.fasta   | 518 261,9 | 100,0 % | 21 | 22 | 31  |

|                        |           |         |    |    |     |
|------------------------|-----------|---------|----|----|-----|
| sp Q62812 N RAT.fasta  | 226 343,8 | 100,0 % | 2  | 2  | 3   |
| sp P06761 G RAT.fasta  | 72 348,5  | 100,0 % | 6  | 7  | 13  |
| sp Q6P6V0 G RAT.fasta  | 62 829,3  | 100,0 % | 14 | 19 | 27  |
| tr Q9JKB7 Q RAT.fasta  | 50 901,6  | 100,0 % | 6  | 7  | 9   |
| tr F1M8G9 F RAT.fasta  | 91 166,5  | 100,0 % | 2  | 2  | 2   |
| sp Q68FP1-2 RAT.fasta  | 86 067,9  | 100,0 % | 6  | 6  | 6   |
| sp Q5XI32 C/RAT.fasta  | 30 629,7  | 100,0 % | 2  | 2  | 3   |
| tr F1MAG6 F1MAG6_RAT   | 0,0       | 100,0 % | 6  | 6  | 9   |
| sp P19527 N RAT.fasta  | 61 336,5  | 100,0 % | 36 | 43 | 86  |
| sp P02680-2 RAT.fasta  | 50 634,3  | 100,0 % | 10 | 14 | 24  |
| sp P35213 1/RAT.fasta  | 28 055,2  | 100,0 % | 5  | 6  | 7   |
| sp P08009 G/RAT.fasta  | 25 682,7  | 100,0 % | 7  | 7  | 9   |
| sp Q62930 C RAT.fasta  | 63 776,5  | 100,0 % | 5  | 6  | 7   |
| sp P07335 K/RAT.fasta  | 42 726,1  | 100,0 % | 18 | 24 | 39  |
| sp Q6P9V9 T RAT.fasta  | 50 151,7  | 100,0 % | 24 | 29 | 39  |
| sp P07323 E/RAT.fasta  | 47 141,5  | 100,0 % | 23 | 32 | 47  |
| sp Q63768-2 RAT.fasta  | 33 844,8  | 100,0 % | 2  | 2  | 2   |
| sp P05708 H/RAT.fasta  | 102 411,0 | 100,0 % | 5  | 5  | 6   |
| tr B0K010 BC RAT.fasta | 14 091,9  | 100,0 % | 2  | 2  | 2   |
| sp P07936 N RAT.fasta  | 23 603,2  | 100,0 % | 8  | 9  | 15  |
| sp Q64119 N RAT.fasta  | 16 974,9  | 100,0 % | 1  | 1  | 1   |
| sp P04276 V RAT.fasta  | 53 545,6  | 100,0 % | 13 | 16 | 30  |
| sp P01946 H RAT.fasta  | 15 328,7  | 100,0 % | 24 | 34 | 95  |
| sp P39069 K/RAT.fasta  | 21 584,4  | 100,0 % | 4  | 4  | 5   |
| tr D3ZFC6 D/RAT.fasta  | 103 757,3 | 100,0 % | 28 | 33 | 50  |
| sp P23593 A/RAT.fasta  | 21 635,8  | 100,0 % | 4  | 5  | 7   |
| sp Q64537 C RAT.fasta  | 28 571,1  | 100,0 % | 2  | 2  | 3   |
| sp P14046 A/RAT.fasta  | 163 774,4 | 100,0 % | 25 | 35 | 49  |
| sp P14668 A/RAT.fasta  | 35 746,5  | 100,0 % | 3  | 3  | 4   |
| sp P14480 F/RAT.fasta  | 54 235,8  | 100,0 % | 22 | 25 | 36  |
| sp O88767 P/RAT.fasta  | 19 974,3  | 100,0 % | 9  | 10 | 15  |
| sp P09117 A/RAT.fasta  | 39 284,3  | 100,0 % | 15 | 19 | 25  |
| sp P12346 T/RAT.fasta  | 76 395,6  | 100,0 % | 62 | 92 | 168 |
| sp Q9WUW3 RAT.fasta    | 67 296,6  | 100,0 % | 4  | 5  | 7   |
| sp P50398 G RAT.fasta  | 50 538,2  | 100,0 % | 7  | 8  | 13  |
| sp P60881 S/RAT.fasta  | 23 315,4  | 100,0 % | 2  | 2  | 2   |
| tr E9PSN2 E9 RAT.fasta | 0,0       | 35,7 %  | 0  | 0  | 0   |
| sp P97685-3 RAT.fasta  | 132 181,4 | 100,0 % | 6  | 6  | 7   |
| tr F1LR02 F1 RAT.fasta | 134 646,3 | 100,0 % | 2  | 2  | 3   |
| sp P04904 G/RAT.fasta  | 25 320,4  | 100,0 % | 3  | 4  | 6   |
| sp P11030 A/RAT.fasta  | 10 027,9  | 100,0 % | 7  | 12 | 14  |
| sp P63329-2 RAT.fasta  | 58 645,7  | 100,0 % | 2  | 2  | 2   |
| sp P06399 F/RAT.fasta  | 86 687,8  | 100,0 % | 13 | 16 | 23  |
| sp P35745 A/RAT.fasta  | 10 863,2  | 100,0 % | 4  | 4  | 4   |
| tr F1M9K9 F/RAT.fasta  | 120 417,4 | 100,0 % | 3  | 3  | 5   |
| sp P23785 G RAT.fasta  | 63 366,6  | 100,0 % | 4  | 4  | 7   |
| sp P47875 C/RAT.fasta  | 20 613,2  | 100,0 % | 3  | 3  | 4   |
| tr F1LPS8 F1/RAT.fasta | 33 737,1  | 100,0 % | 2  | 2  | 3   |
| sp Q9JHU0 D RAT.fasta  | 61 539,8  | 100,0 % | 3  | 3  | 3   |
| sp P50399 G RAT.fasta  | 50 539,1  | 100,0 % | 8  | 10 | 12  |
| sp Q4FZU2 K RAT.fasta  | 59 250,6  | 98,7 %  | 1  | 1  | 2   |

|                        |           |         |    |    |    |
|------------------------|-----------|---------|----|----|----|
| sp P03994 H RAT.fasta  | 40 262,4  | 100,0 % | 4  | 5  | 6  |
| sp P13233 CI RAT.fasta | 47 270,0  | 100,0 % | 12 | 13 | 15 |
| sp P31232 T/ RAT.fasta | 22 602,7  | 98,7 %  | 1  | 1  | 2  |
| sp P48500 TI RAT.fasta | 26 848,7  | 100,0 % | 19 | 29 | 50 |
| tr F1LM30 F1 RAT.fasta | 51 745,4  | 100,0 % | 5  | 7  | 15 |
| tr D3ZFH5 D: RAT.fasta | 106 528,4 | 94,0 %  | 0  | 0  | 0  |
| tr D3ZUK7 D3ZUK7_RAT   | 0,0       | 100,0 % | 2  | 2  | 2  |
| sp P69897 TI RAT.fasta | 49 670,6  | 100,0 % | 5  | 5  | 6  |
| tr F1LRX5 F1LRX5_RAT   | 0,0       | 100,0 % | 15 | 17 | 21 |
| tr Q7TQ25 Q7TQ25_RAT   | 0,0       | 100,0 % | 5  | 6  | 9  |
| sp P34058 H: RAT.fasta | 83 284,3  | 100,0 % | 21 | 23 | 40 |
| sp P20759 IG RAT.fasta | 35 944,3  | 100,0 % | 4  | 7  | 11 |
| tr F8WFW0 F8WFW0_RAT   | 0,0       | 100,0 % | 2  | 2  | 2  |
| sp Q9EQS0 T RAT.fasta  | 37 461,8  | 100,0 % | 6  | 6  | 7  |
| sp P10860 DI RAT.fasta | 61 417,4  | 100,0 % | 2  | 2  | 2  |
| sp P85845 F: RAT.fasta | 54 491,2  | 100,0 % | 3  | 3  | 3  |
| sp P05197 Ef RAT.fasta | 95 286,0  | 100,0 % | 16 | 17 | 21 |
| sp P62630 Ef RAT.fasta | 50 114,2  | 100,0 % | 5  | 5  | 6  |
| sp P52303-2  RAT.fasta | 104 591,4 | 100,0 % | 3  | 3  | 4  |
| sp P02454 C( RAT.fasta | 137 953,8 | 76,4 %  | 0  | 0  | 0  |
| sp P60203 M RAT.fasta  | 30 077,7  | 100,0 % | 6  | 6  | 10 |
| tr F1LQ63 F1 RAT.fasta | 139 429,9 | 100,0 % | 9  | 9  | 10 |
| sp P47709 RI RAT.fasta | 75 833,3  | 100,0 % | 2  | 2  | 4  |
| tr D3ZVB7 D: RAT.fasta | 34 071,5  | 100,0 % | 1  | 2  | 2  |
| sp Q5I0D1 G RAT.fasta  | 33 268,2  | 100,0 % | 2  | 2  | 2  |
| sp Q9QUL6 H RAT.fasta  | 82 655,5  | 100,0 % | 3  | 3  | 4  |
| sp P55051 F/ RAT.fasta | 14 863,7  | 100,0 % | 11 | 15 | 20 |
| tr Q5PQU1 Q5PQU1_RAT   | 0,0       | 100,0 % | 9  | 11 | 24 |
| sp Q6IFW6 K RAT.fasta  | 56 506,5  | 100,0 % | 7  | 7  | 10 |
| sp P05544 Sf RAT.fasta | 46 279,0  | 100,0 % | 4  | 4  | 5  |
| sp P31596-2  RAT.fasta | 62 108,3  | 100,0 % | 3  | 4  | 7  |
| sp P24268 C/ RAT.fasta | 44 682,0  | 99,8 %  | 1  | 1  | 1  |
| sp P04906 G: RAT.fasta | 23 439,8  | 100,0 % | 6  | 6  | 7  |
| tr D4A7Y1 D: RAT.fasta | 224 612,0 | 100,0 % | 5  | 6  | 6  |
| sp P16086 SPTA2_RAT    | 0,0       | 100,0 % | 40 | 50 | 61 |
| sp Q00981 U RAT.fasta  | 24 838,2  | 100,0 % | 13 | 19 | 28 |
| sp P31000 VI RAT.fasta | 53 733,9  | 100,0 % | 21 | 23 | 37 |
| tr F1M6Q3 F RAT.fasta  | 166 252,0 | 61,9 %  | 0  | 0  | 0  |
| sp P31722 C: RAT.fasta | 25 685,9  | 100,0 % | 3  | 3  | 6  |
| sp P00697 LY RAT.fasta | 16 729,2  | 100,0 % | 4  | 6  | 9  |
| sp P63018 H: RAT.fasta | 70 872,8  | 100,0 % | 20 | 27 | 43 |
| sp P02688-2  RAT.fasta | 18 488,3  | 100,0 % | 14 | 18 | 77 |
| tr D3ZJ08 D3 RAT.fasta | 15 388,7  | 100,0 % | 1  | 1  | 1  |
| sp P08649 C( RAT.fasta | 192 164,5 | 100,0 % | 2  | 2  | 2  |
| sp P85515 A( RAT.fasta | 42 615,2  | 100,0 % | 2  | 2  | 2  |
| sp P60711 A( RAT.fasta | 41 737,8  | 100,0 % | 24 | 29 | 46 |
| sp P62804 H: RAT.fasta | 11 367,7  | 100,0 % | 3  | 4  | 6  |
| sp P11762 LE RAT.fasta | 14 857,2  | 100,0 % | 3  | 3  | 6  |
| sp P61265 S1 RAT.fasta | 33 245,1  | 100,0 % | 2  | 2  | 3  |
| tr D3Z8P5 D: RAT.fasta | 35 269,8  | 100,0 % | 3  | 3  | 5  |
| sp P85973 PI RAT.fasta | 32 301,7  | 100,0 % | 3  | 3  | 5  |



|                         |           |         |    |     |     |
|-------------------------|-----------|---------|----|-----|-----|
| sp Q00715 H RAT.fasta   | 13 990,6  | 100,0 % | 4  | 4   | 5   |
| tr C0JPT7 C0. RAT.fasta | 280 485,3 | 100,0 % | 6  | 6   | 7   |
| sp Q6IFV1 K1 RAT.fasta  | 52 684,9  | 76,6 %  | 0  | 0   | 0   |
| tr E9PSV0 E9PSV0_RAT    | 0,0       | 100,0 % | 5  | 5   | 9   |
| sp P40241 CI RAT.fasta  | 25 215,7  | 100,0 % | 2  | 3   | 4   |
| sp Q07936 A RAT.fasta   | 38 680,2  | 100,0 % | 3  | 3   | 4   |
| tr F1M983 F: RAT.fasta  | 140 007,0 | 100,0 % | 11 | 16  | 22  |
| sp P07150 AI RAT.fasta  | 38 831,0  | 99,8 %  | 1  | 1   | 1   |
| tr F1MAA7 F RAT.fasta   | 177 385,1 | 98,7 %  | 1  | 1   | 2   |
| sp P62738 A RAT.fasta   | 42 010,1  | 100,0 % | 2  | 2   | 3   |
| tr D3ZS68 D3ZS68_RAT    | 0,0       | 100,0 % | 4  | 4   | 5   |
| sp P37805 T/ RAT.fasta  | 22 500,9  | 100,0 % | 3  | 3   | 7   |
| sp Q5XI73 GI RAT.fasta  | 23 408,0  | 100,0 % | 4  | 4   | 5   |
| sp P45592 C( RAT.fasta  | 18 533,2  | 100,0 % | 12 | 14  | 19  |
| sp Q62718 N RAT.fasta   | 37 997,6  | 100,0 % | 3  | 3   | 5   |
| tr Q9JI04 Q9. RAT.fasta | 171 575,7 | 19,4 %  | 0  | 0   | 0   |
| sp P36953 AI RAT.fasta  | 69 336,5  | 100,0 % | 8  | 8   | 9   |
| sp P11980 KI RAT.fasta  | 57 818,6  | 100,0 % | 35 | 45  | 62  |
| sp P04639 AI RAT.fasta  | 30 062,4  | 100,0 % | 3  | 3   | 3   |
| sp P62260 1/ RAT.fasta  | 29 175,0  | 100,0 % | 8  | 11  | 13  |
| sp P11348 DI RAT.fasta  | 25 552,3  | 100,0 % | 4  | 6   | 9   |
| tr F1LP60 F1  RAT.fasta | 67 653,6  | 100,0 % | 4  | 4   | 4   |
| tr F1LNH3 F1 RAT.fasta  | 109 660,6 | 13,2 %  | 0  | 0   | 0   |
| sp P19332-2  RAT.fasta  | 71 773,6  | 100,0 % | 2  | 2   | 3   |
| tr E9PSV5 E9 RAT.fasta  | 40 490,9  | 100,0 % | 2  | 2   | 2   |
| sp Q6QD51 C( RAT.fasta  | 107 693,2 | 75,3 %  | 0  | 0   | 0   |
| sp P02770 AI RAT.fasta  | 68 731,2  | 100,0 % | 89 | 137 | 385 |
| sp Q5FVI4 Cf RAT.fasta  | 15 043,2  | 100,0 % | 5  | 6   | 9   |
| sp P14141 C/ RAT.fasta  | 29 431,8  | 100,0 % | 9  | 12  | 26  |
| tr B2RZA9 B2 RAT.fasta  | 17 862,3  | 100,0 % | 3  | 3   | 3   |
| tr D4A115 D/ RAT.fasta  | 240 199,7 | 100,0 % | 23 | 28  | 30  |
| sp Q68FS4-2  RAT.fasta  | 56 151,2  | 100,0 % | 6  | 6   | 7   |
| tr D4ABR6 D. RAT.fasta  | 0,0       | 100,0 % | 3  | 3   | 3   |
| sp Q9QZ76 N RAT.fasta   | 17 157,5  | 100,0 % | 5  | 7   | 7   |
| sp P13697 M RAT.fasta   | 64 004,3  | 100,0 % | 2  | 2   | 2   |
| sp Q63716 P RAT.fasta   | 22 110,2  | 100,0 % | 13 | 16  | 26  |
| sp Q6P7Q4 L RAT.fasta   | 20 820,7  | 100,0 % | 3  | 3   | 4   |
| sp P55068 P( RAT.fasta  | 96 057,1  | 100,0 % | 8  | 8   | 8   |
| sp P11598 PI RAT.fasta  | 56 625,5  | 100,0 % | 7  | 7   | 10  |
| sp P11980-2  RAT.fasta  | 57 781,6  | 100,0 % | 2  | 2   | 2   |
| sp P09006 Sf RAT.fasta  | 46 654,0  | 100,0 % | 2  | 2   | 2   |
| sp P47942 DI RAT.fasta  | 62 277,9  | 100,0 % | 27 | 32  | 53  |
| sp P0CG51 U RAT.fasta   | 14 728,9  | 100,0 % | 3  | 3   | 7   |
| sp P15999 A` RAT.fasta  | 59 755,2  | 100,0 % | 4  | 4   | 5   |
| tr D3ZF59 D3ZF59_RAT    | 0,0       | 39,7 %  | 0  | 0   | 0   |
| tr D3ZGK7 D: RAT.fasta  | 60 310,5  | 100,0 % | 7  | 9   | 10  |
| tr Q66HI5 Q( RAT.fasta  | 21 100,1  | 100,0 % | 6  | 7   | 10  |
| sp P50137 Tf RAT.fasta  | 67 644,7  | 100,0 % | 12 | 12  | 13  |
| sp P46462 Tf RAT.fasta  | 89 351,8  | 100,0 % | 14 | 16  | 20  |
| tr D4A0Y1 D4A0Y1_RAT    | 0,0       | 100,0 % | 3  | 4   | 4   |
| sp Q62952 D RAT.fasta   | 61 967,8  | 100,0 % | 3  | 3   | 5   |

|                           |           |         |    |    |    |
|---------------------------|-----------|---------|----|----|----|
| tr Q6IN22 Qf RAT.fasta    | 37 544,1  | 100,0 % | 11 | 13 | 18 |
| sp P10111 PI RAT.fasta    | 17 874,8  | 100,0 % | 16 | 18 | 30 |
| sp P29315 RI RAT.fasta    | 49 975,6  | 100,0 % | 6  | 6  | 6  |
| sp P11232 TI RAT.fasta    | 11 673,3  | 100,0 % | 2  | 2  | 4  |
| sp O08838 A RAT.fasta     | 74 878,1  | 100,0 % | 2  | 2  | 3  |
| tr D3ZEI4 D3 RAT.fasta    | 46 530,2  | 100,0 % | 2  | 2  | 2  |
| sp Q6P6Q2 K RAT.fasta     | 61 827,3  | 98,7 %  | 1  | 1  | 1  |
| tr D3ZQ25 D: RAT.fasta    | 78 070,0  | 89,2 %  | 1  | 1  | 1  |
| tr F1LNN9 F1LNN9_RAT      | 0,0       | 100,0 % | 7  | 10 | 15 |
| sp P06686 A` RAT.fasta    | 112 220,7 | 100,0 % | 4  | 4  | 6  |
| sp Q9ESM2 † RAT.fasta     | 38 047,2  | 100,0 % | 7  | 8  | 19 |
| sp P11517 H RAT.fasta     | 15 982,3  | 100,0 % | 9  | 12 | 28 |
| sp P00564 K( RAT.fasta    | 43 045,6  | 100,0 % | 3  | 3  | 3  |
| sp P16290 P( RAT.fasta    | 28 755,7  | 100,0 % | 4  | 5  | 10 |
| sp P04642 LI RAT.fasta    | 36 450,8  | 100,0 % | 10 | 11 | 14 |
| tr E9PSN4 E9 RAT.fasta    | 203 528,4 | 11,5 %  | 0  | 0  | 0  |
| sp Q9QX79 F RAT.fasta     | 41 532,1  | 100,0 % | 7  | 9  | 11 |
| sp O88989 N RAT.fasta     | 36 483,9  | 100,0 % | 13 | 13 | 21 |
| tr F8WGA3 F RAT.fasta     | 42 336,0  | 100,0 % | 2  | 2  | 2  |
| sp P16617 P( RAT.fasta    | 44 539,1  | 100,0 % | 19 | 23 | 26 |
| sp Q9R0J8 L( RAT.fasta    | 49 465,8  | 75,3 %  | 0  | 0  | 0  |
| tr D4ADG9 D RAT.fasta     | 66 931,9  | 34,1 %  | 0  | 0  | 0  |
| sp Q6AY61 P RAT.fasta     | 43 161,1  | 6,5 %   | 0  | 0  | 0  |
| sp Q6IFU8 K: RAT.fasta    | 48 123,9  | 98,7 %  | 1  | 1  | 2  |
| sp Q6IMF3 K RAT.fasta     | 64 831,7  | 100,0 % | 2  | 3  | 4  |
| tr F1M9V7 F: RAT.fasta    | 103 347,0 | 100,0 % | 6  | 6  | 8  |
| sp Q5GFD9 I   RAT.fasta   | 35 995,6  | 100,0 % | 2  | 2  | 2  |
| sp Q63610 T RAT.fasta     | 29 007,2  | 100,0 % | 5  | 6  | 8  |
| tr F1LUV9 F1 RAT.fasta    | 92 311,9  | 100,0 % | 19 | 23 | 37 |
| sp Q5I0D7 PI RAT.fasta    | 54 750,3  | 100,0 % | 4  | 4  | 4  |
| sp Q6P9T8 TBB2C_RAT       | 0,0       | 100,0 % | 3  | 4  | 7  |
| sp P51886 LL RAT.fasta    | 38 281,3  | 100,0 % | 8  | 11 | 15 |
| sp P10719 A` RAT.fasta    | 56 354,3  | 100,0 % | 3  | 3  | 4  |
| sp P30009 M RAT.fasta     | 29 794,2  | 100,0 % | 9  | 9  | 14 |
| tr D3ZWH0 D3ZWH0_RAT-I0,0 |           | 95,2 %  | 0  | 0  | 0  |
| sp P07154 C/ RAT.fasta    | 37 660,6  | 100,0 % | 2  | 2  | 3  |
| sp P09812 P^ RAT.fasta    | 97 276,7  | 100,0 % | 3  | 3  | 3  |
| sp P85972 VI RAT.fasta    | 116 617,3 | 100,0 % | 1  | 1  | 1  |
| tr Q5XI38 Q5 RAT.fasta    | 70 124,7  | 100,0 % | 7  | 9  | 12 |
| sp Q9WUC4  RAT.fasta      | 7 292,5   | 100,0 % | 2  | 2  | 2  |
| sp P58775-2  RAT.fasta    | 32 958,6  | 100,0 % | 3  | 4  | 6  |
| sp P38652 P( RAT.fasta    | 61 405,2  | 100,0 % | 6  | 7  | 10 |
| sp P07340 A` RAT.fasta    | 35 203,6  | 100,0 % | 4  | 4  | 5  |
| sp P04636 M RAT.fasta     | 35 684,2  | 100,0 % | 11 | 11 | 14 |
| sp Q6IG02 K: RAT.fasta    | 69 127,7  | 100,0 % | 3  | 3  | 3  |
| sp P04631 S¡ RAT.fasta    | 10 743,9  | 100,0 % | 3  | 7  | 10 |
| sp Q6Q0N1 ( RAT.fasta     | 52 694,2  | 100,0 % | 2  | 2  | 3  |
| sp P09495 Tf RAT.fasta    | 28 510,4  | 99,7 %  | 1  | 1  | 1  |
| sp Q3B8Q0 N RAT.fasta     | 36 988,4  | 100,0 % | 2  | 2  | 3  |
| sp Q9EPC6 P RAT.fasta     | 15 002,1  | 100,0 % | 5  | 5  | 8  |
| sp Q03626 N RAT.fasta     | 165 327,3 | 100,0 % | 9  | 13 | 22 |

|                         |           |         |    |    |     |
|-------------------------|-----------|---------|----|----|-----|
| sp O35244 P RAT.fasta   | 24 819,9  | 100,0 % | 5  | 7  | 8   |
| tr A7M778 A RAT.fasta   | 53 484,3  | 100,0 % | 1  | 1  | 1   |
| sp P09606 G RAT.fasta   | 42 268,3  | 100,0 % | 4  | 4  | 5   |
| sp P63102 1 RAT.fasta   | 27 771,9  | 100,0 % | 15 | 20 | 28  |
| tr F1LM84 F1 RAT.fasta  | 137 037,9 | 100,0 % | 1  | 1  | 2   |
| sp Q9QXQ0  RAT.fasta    | 104 918,2 | 100,0 % | 8  | 8  | 9   |
| sp P06238 A RAT.fasta   | 163 785,7 | 100,0 % | 2  | 2  | 3   |
| sp Q6P6R2 D RAT.fasta   | 54 038,2  | 100,0 % | 3  | 3  | 3   |
| tr Q5I0M1 Q RAT.fasta   | 38 457,3  | 100,0 % | 9  | 12 | 16  |
| sp P01026 C RAT.fasta   | 186 462,2 | 100,0 % | 20 | 23 | 33  |
| tr D4A133 D RAT.fasta   | 68 266,4  | 100,0 % | 2  | 2  | 2   |
| sp P20761 IC RAT.fasta  | 36 495,8  | 100,0 % | 5  | 7  | 10  |
| sp Q01177 P RAT.fasta   | 90 535,1  | 100,0 % | 12 | 13 | 23  |
| sp Q9Z1P2 A RAT.fasta   | 102 963,9 | 98,7 %  | 1  | 1  | 1   |
| tr F1LST1 F1I RAT.fasta | 202 546,0 | 100,0 % | 27 | 32 | 53  |
| tr F1LQ00 F1 RAT.fasta  | 142 475,8 | 14,4 %  | 0  | 0  | 0   |
| tr D3ZHC4 D RAT.fasta   | 22 950,8  | 100,0 % | 3  | 3  | 3   |
| tr D3ZQM5 D3ZQM5_RAT    | 0,0       | 76,2 %  | 0  | 0  | 0   |
| tr Q7TP54 Q RAT.fasta   | 144 712,1 | 100,0 % | 9  | 13 | 16  |
| tr B2GV03 B2GV03_RAT    | 0,0       | 100,0 % | 8  | 9  | 9   |
| sp P04785 PI RAT.fasta  | 56 953,4  | 100,0 % | 3  | 3  | 5   |
| sp B0BNN3 C RAT.fasta   | 28 299,9  | 100,0 % | 12 | 15 | 30  |
| tr D3ZZX3 D3ZZX3_RAT    | 0,0       | 100,0 % | 28 | 34 | 43  |
| sp P34926 M RAT.fasta   | 299 530,8 | 100,0 % | 7  | 7  | 10  |
| sp Q5XFX0 T RAT.fasta   | 22 393,8  | 100,0 % | 4  | 4  | 6   |
| sp Q63198 C RAT.fasta   | 113 497,1 | 100,0 % | 7  | 7  | 13  |
| sp P02767 T RAT.fasta   | 15 719,9  | 100,0 % | 3  | 3  | 4   |
| tr F1LMV6 F RAT.fasta   | 332 400,6 | 99,3 %  | 0  | 0  | 0   |
| sp Q9ER34 A RAT.fasta   | 85 436,1  | 100,0 % | 5  | 5  | 7   |
| sp P06687 A RAT.fasta   | 111 694,4 | 100,0 % | 18 | 18 | 27  |
| sp Q63416 IT RAT.fasta  | 99 099,5  | 100,0 % | 9  | 10 | 13  |
| sp P63041 CI RAT.fasta  | 15 122,7  | 100,0 % | 2  | 2  | 2   |
| tr D4A6X4 D RAT.fasta   | 11 311,9  | 100,0 % | 2  | 2  | 2   |
| sp P27274 CI RAT.fasta  | 13 790,5  | 100,0 % | 4  | 4  | 9   |
| tr Q3MHS9 C RAT.fasta   | 58 018,4  | 100,0 % | 2  | 2  | 2   |
| tr Q8CHN5 C RAT.fasta   | 16 363,9  | 100,0 % | 1  | 1  | 2   |
| tr F1M7I8 F1 RAT.fasta  | 13 577,6  | 100,0 % | 2  | 2  | 2   |
| sp P20961 P RAT.fasta   | 45 010,6  | 100,0 % | 4  | 5  | 6   |
| sp P04692-3  RAT.fasta  | 32 682,0  | 98,7 %  | 1  | 1  | 1   |
| sp P02091 H RAT.fasta   | 15 979,4  | 100,0 % | 39 | 61 | 146 |
| sp Q6B345 S RAT.fasta   | 11 065,2  | 100,0 % | 2  | 2  | 2   |
| sp P55067 N RAT.fasta   | 0,0       | 100,0 % | 4  | 4  | 4   |
| tr D3ZRK9 D RAT.fasta   | 0,0       | 100,0 % | 4  | 4  | 4   |
| tr F1LS57 F1I RAT.fasta | 125 961,6 | 34,5 %  | 0  | 0  | 0   |
| sp P08413 K RAT.fasta   | 60 402,3  | 100,0 % | 2  | 2  | 2   |
| sp P08699 LE RAT.fasta  | 27 202,1  | 100,0 % | 3  | 4  | 5   |
| sp Q1WIM1  RAT.fasta    | 42 780,2  | 100,0 % | 6  | 7  | 15  |
| sp Q9ERB4-2 RAT.fasta   | 300 004,9 | 100,0 % | 14 | 18 | 33  |
| sp P02401 RI RAT.fasta  | 11 692,3  | 100,0 % | 5  | 5  | 7   |
| sp P48199 CI RAT.fasta  | 25 468,3  | 100,0 % | 3  | 3  | 4   |
| sp P61983 1 RAT.fasta   | 28 303,1  | 100,0 % | 11 | 13 | 18  |

|                        |           |         |    |    |    |
|------------------------|-----------|---------|----|----|----|
| tr D3ZTB5 D RAT.fasta  | 11 198,3  | 100,0 % | 2  | 2  | 3  |
| sp Q7M0E3 I RAT.fasta  | 18 534,1  | 100,0 % | 2  | 2  | 3  |
| sp P20059 H RAT.fasta  | 51 351,5  | 100,0 % | 19 | 25 | 39 |
| sp P28073 P RAT.fasta  | 25 289,6  | 100,0 % | 2  | 2  | 2  |
| sp Q5PPN5 T RAT.fasta  | 18 980,2  | 100,0 % | 4  | 4  | 5  |
| sp P07943 A RAT.fasta  | 35 797,7  | 100,0 % | 5  | 5  | 7  |
| sp P68255 L RAT.fasta  | 27 779,4  | 100,0 % | 6  | 6  | 8  |
| tr F1LRL9 F1 RAT.fasta | 269 643,4 | 100,0 % | 5  | 5  | 6  |
| sp P07483 F RAT.fasta  | 14 774,8  | 100,0 % | 2  | 2  | 3  |
| sp P20767 L RAT.fasta  | 11 317,4  | 100,0 % | 5  | 6  | 12 |
| sp Q6AYC4 C RAT.fasta  | 38 799,7  | 99,9 %  | 1  | 1  | 4  |
| sp P30904 M RAT.fasta  | 12 477,4  | 100,0 % | 2  | 2  | 6  |
| sp P09951-2 RAT.fasta  | 69 909,4  | 100,0 % | 3  | 3  | 4  |
| sp P23565 A RAT.fasta  | 56 116,7  | 100,0 % | 12 | 12 | 20 |
| sp P50115 S RAT.fasta  | 10 238,4  | 100,0 % | 3  | 3  | 4  |
| sp O35077 G RAT.fasta  | 37 452,4  | 100,0 % | 4  | 4  | 5  |
| sp P15429 E RAT.fasta  | 47 015,0  | 100,0 % | 6  | 6  | 7  |
| sp P63029 T RAT.fasta  | 19 462,9  | 100,0 % | 2  | 3  | 4  |
| sp Q63544 S RAT.fasta  | 12 918,2  | 100,0 % | 6  | 9  | 16 |
| sp Q9JK11 R RAT.fasta  | 126 391,0 | 100,0 % | 6  | 6  | 8  |
| tr D3ZQN7 D RAT.fasta  | 202 784,2 | 7,2 %   | 0  | 0  | 0  |
| sp P85971 G RAT.fasta  | 27 235,0  | 100,0 % | 2  | 3  | 4  |
| sp P62963 P RAT.fasta  | 14 957,3  | 100,0 % | 7  | 9  | 10 |
| tr Q63910 Q RAT.fasta  | 15 525,0  | 100,0 % | 3  | 3  | 4  |
| sp P07895 S RAT.fasta  | 24 674,3  | 100,0 % | 3  | 3  | 3  |
| sp P48679 L RAT.fasta  | 74 325,0  | 100,0 % | 6  | 7  | 7  |
| sp P97697 I RAT.fasta  | 30 495,6  | 100,0 % | 2  | 2  | 3  |
| sp Q08163 C RAT.fasta  | 51 588,9  | 100,0 % | 5  | 6  | 8  |
| sp P68511 L RAT.fasta  | 28 212,6  | 100,0 % | 3  | 3  | 5  |
| sp P36972 A RAT.fasta  | 19 546,6  | 35,9 %  | 0  | 0  | 0  |
| tr B5DF65 B RAT.fasta  | 22 093,7  | 100,0 % | 2  | 2  | 2  |
| tr D3ZWH5 C RAT.fasta  | 28 014,0  | 100,0 % | 2  | 2  | 4  |
| sp P51635 A RAT.fasta  | 36 506,2  | 100,0 % | 3  | 3  | 5  |
| sp Q9Z0W7 C RAT.fasta  | 28 634,4  | 100,0 % | 2  | 2  | 3  |
| sp Q5U300 L RAT.fasta  | 117 788,8 | 100,0 % | 3  | 3  | 3  |
| sp Q2PQA9 K RAT.fasta  | 109 531,6 | 100,0 % | 2  | 2  | 2  |
| sp P17475 A RAT.fasta  | 46 137,6  | 100,0 % | 15 | 19 | 28 |
| sp P30120 T RAT.fasta  | 23 794,2  | 19,5 %  | 0  | 0  | 0  |
| tr F1M853 F RAT.fasta  | 170 987,4 | 100,0 % | 2  | 2  | 2  |
| tr Q9QX80 Q RAT.fasta  | 30 853,6  | 100,0 % | 2  | 2  | 2  |
| sp P05065 A RAT.fasta  | 39 352,6  | 100,0 % | 26 | 32 | 52 |
| sp Q64559-1 RAT.fasta  | 37 560,3  | 100,0 % | 3  | 3  | 3  |
| sp Q05982 N RAT.fasta  | 17 193,0  | 100,0 % | 10 | 12 | 22 |
| sp Q6AY84 S RAT.fasta  | 46 396,0  | 100,0 % | 5  | 5  | 7  |
| sp P85108 T RAT.fasta  | 49 907,1  | 100,0 % | 23 | 33 | 52 |
| sp P52759 U RAT.fasta  | 14 303,8  | 100,0 % | 3  | 3  | 5  |
| sp Q5I0D5 L RAT.fasta  | 29 190,3  | 100,0 % | 2  | 2  | 2  |
| tr D4A5L9 D RAT.fasta  | 11 636,0  | 100,0 % | 4  | 5  | 8  |
| sp P22057 P RAT.fasta  | 21 301,7  | 100,0 % | 4  | 4  | 5  |
| sp P14841 C RAT.fasta  | 15 436,8  | 100,0 % | 9  | 11 | 19 |
| sp P11442 C RAT.fasta  | 0,0       | 100,0 % | 7  | 7  | 9  |

|                         |           |         |    |    |    |
|-------------------------|-----------|---------|----|----|----|
| sp P08932 KI RAT.fasta  | 47 704,1  | 100,0 % | 28 | 41 | 97 |
| sp Q6MGD0  RAT.fasta    | 18 658,7  | 100,0 % | 2  | 3  | 3  |
| tr Q62669 QI RAT.fasta  | 16 022,6  | 100,0 % | 7  | 8  | 10 |
| tr F1M566 F: RAT.fasta  | 230 834,3 | 100,0 % | 13 | 13 | 20 |
| tr Q6P9V6 Q RAT.fasta   | 26 411,3  | 100,0 % | 2  | 3  | 4  |
| sp Q64303 P RAT.fasta   | 57 962,1  | 100,0 % | 2  | 2  | 3  |
| sp P50229 C( RAT.fasta  | 10 335,1  | 100,0 % | 3  | 3  | 3  |
| tr D3ZVQ0 D RAT.fasta   | 95 780,8  | 100,0 % | 2  | 2  | 2  |
| sp P00762 Tf RAT.fasta  | 25 959,1  | 98,7 %  | 1  | 2  | 6  |
| sp Q9EPH1 A RAT.fasta   | 56 479,3  | 100,0 % | 10 | 11 | 15 |
| sp P02650 AI RAT.fasta  | 35 753,4  | 100,0 % | 5  | 5  | 14 |
| sp P06866 H RAT.fasta   | 38 563,0  | 100,0 % | 18 | 22 | 42 |
| sp Q78P75 D RAT.fasta   | 10 350,1  | 100,0 % | 3  | 3  | 5  |
| sp Q4QRB4 T RAT.fasta   | 50 418,7  | 100,0 % | 9  | 10 | 12 |
| tr F1LRZ7 F1I RAT.fasta | 114 411,8 | 100,0 % | 25 | 31 | 37 |
| sp P19944 RI RAT.fasta  | 11 498,1  | 100,0 % | 2  | 2  | 2  |
| sp Q5QD51-2 RAT.fasta   | 173 057,0 | 100,0 % | 4  | 4  | 5  |
| sp P02262 H: RAT.fasta  | 14 078,0  | 100,0 % | 7  | 9  | 13 |
| sp Q5XIF6 TE RAT.fasta  | 49 924,6  | 100,0 % | 3  | 4  | 5  |
| tr F1LPR6 F1 RAT.fasta  | 41 307,3  | 100,0 % | 3  | 3  | 5  |
| sp O35987 N RAT.fasta   | 40 680,2  | 100,0 % | 3  | 3  | 3  |
| sp Q99PS8 H RAT.fasta   | 59 047,3  | 100,0 % | 7  | 7  | 10 |
| sp Q63691 C RAT.fasta   | 40 055,2  | 100,0 % | 4  | 5  | 7  |
| tr D3ZHA0 D: RAT.fasta  | 290 978,7 | 100,0 % | 15 | 15 | 19 |
| tr D3ZFY8 D3 RAT.fasta  | 16 354,8  | 100,0 % | 4  | 4  | 5  |
| tr D3ZD09 D: RAT.fasta  | 10 071,5  | 100,0 % | 2  | 2  | 2  |
| sp P80254 D( RAT.fasta  | 13 133,9  | 100,0 % | 7  | 9  | 12 |
| sp P19804 N RAT.fasta   | 17 283,3  | 100,0 % | 4  | 7  | 8  |
| sp B2RYG6 O RAT.fasta   | 31 270,5  | 100,0 % | 2  | 2  | 3  |
| sp P27139 C/ RAT.fasta  | 29 114,3  | 100,0 % | 7  | 8  | 10 |
| sp P01835 K/ RAT.fasta  | 11 600,7  | 100,0 % | 8  | 12 | 27 |
| sp P31044 PI RAT.fasta  | 20 801,4  | 100,0 % | 17 | 21 | 32 |
| sp P49911 AI RAT.fasta  | 28 565,3  | 100,0 % | 2  | 2  | 3  |
| sp Q6IG03 K: RAT.fasta  | 60 388,4  | 98,7 %  | 1  | 1  | 3  |
| sp P62815 V: RAT.fasta  | 56 552,3  | 100,0 % | 3  | 4  | 4  |
| sp P04764 EI RAT.fasta  | 47 129,0  | 100,0 % | 27 | 34 | 50 |
| sp Q62813-2  RAT.fasta  | 37 324,0  | 100,0 % | 4  | 6  | 7  |
| tr Q6P6G4 Q RAT.fasta   | 30 077,3  | 100,0 % | 3  | 3  | 4  |
| sp P62161 C/ RAT.fasta  | 16 838,0  | 100,0 % | 3  | 5  | 8  |
| sp P62959 H RAT.fasta   | 13 777,2  | 100,0 % | 3  | 3  | 4  |
| sp P55053 F/ RAT.fasta  | 15 059,3  | 100,0 % | 7  | 7  | 10 |
| sp P21575-3  RAT.fasta  | 92 507,4  | 100,0 % | 2  | 2  | 2  |
| sp Q8VI04 A: RAT.fasta  | 34 410,7  | 100,0 % | 4  | 4  | 11 |
| tr F1LSW0 F1LSW0_RAT    | 0,0       | 99,9 %  | 1  | 1  | 2  |
| sp P07632 S( RAT.fasta  | 15 910,7  | 100,0 % | 9  | 15 | 33 |
| sp P41498-2  RAT.fasta  | 18 151,8  | 100,0 % | 2  | 2  | 2  |
| sp O88600 H RAT.fasta   | 94 057,4  | 100,0 % | 4  | 4  | 6  |
| sp P68370 Tf RAT.fasta  | 50 135,7  | 100,0 % | 2  | 3  | 3  |
| tr D3ZHM9 C RAT.fasta   | 12 439,8  | 100,0 % | 2  | 2  | 3  |
| sp Q62658 F( RAT.fasta  | 11 922,7  | 100,0 % | 3  | 3  | 5  |
| sp Q68FQ2 J: RAT.fasta  | 34 782,6  | 100,0 % | 2  | 2  | 3  |

|                        |           |         |    |    |    |
|------------------------|-----------|---------|----|----|----|
| sp P01830 Tl RAT.fasta | 18 172,8  | 100,0 % | 7  | 9  | 11 |
| sp P82995 Hl RAT.fasta | 84 818,3  | 100,0 % | 11 | 13 | 18 |
| sp Q9R063 Pl RAT.fasta | 22 178,5  | 100,0 % | 9  | 11 | 14 |
| sp P10960 Sl RAT.fasta | 61 122,8  | 100,0 % | 7  | 9  | 15 |
| sp P23562-2  RAT.fasta | 103 177,5 | 100,0 % | 2  | 2  | 3  |
| sp P54690 Bl RAT.fasta | 46 047,0  | 100,0 % | 2  | 2  | 2  |
| sp P07151 Bl RAT.fasta | 13 720,0  | 98,7 %  | 1  | 1  | 1  |
| sp P62329 Tl RAT.fasta | 5 052,9   | 100,0 % | 10 | 13 | 25 |
| sp P25304-2  RAT.fasta | 208 638,9 | 100,0 % | 2  | 2  | 2  |
| sp Q9EQX9 Ll RAT.fasta | 17 124,6  | 100,0 % | 5  | 5  | 7  |

et1

VI (Oxidation), +42 on n (Acetyl), +80 on Y (Phospho)

Percentage of Percentage sequence coverage

|           |        |
|-----------|--------|
| 0,00265%  | 27,5%  |
| 0,00159%  | 11,6%  |
| 0,00106%  | 21,4%  |
| 0,000%    | 0,000% |
| 0,00530%  | 9,73%  |
| 0,00318%  | 20,4%  |
| 0,000%    | 0,000% |
| 0,00371%  | 4,86%  |
| 0,00530%  | 14,6%  |
| 0,000%    | 0,000% |
| 0,000%    | 0,000% |
| 0,000%    | 0,000% |
| 0,00106%  | 9,38%  |
| 0,00106%  | 7,45%  |
| 0,000%    | 0,000% |
| 0,000%    | 0,000% |
| 0,00265%  | 19,0%  |
| 0,00371%  | 5,67%  |
| 0,00902%  | 5,29%  |
| 0,0414%   | 25,9%  |
| 0,00318%  | 5,88%  |
| 0,00106%  | 8,81%  |
| 0,000%    | 6,12%  |
| 0,00849%  | 27,9%  |
| 0,000530% | 0,560% |
| 0,000%    | 12,1%  |
| 0,00637%  | 30,0%  |
| 0,0541%   | 23,3%  |
| 0,000%    | 0,000% |
| 0,00106%  | 8,43%  |
| 0,000%    | 0,000% |
| 0,00424%  | 0,000% |
| 0,000%    | 0,000% |
| 0,000%    | 0,000% |
| 0,000%    | 0,000% |
| 0,00212%  | 19,1%  |
| 0,532%    | 88,5%  |
| 0,000%    | 0,000% |
| 0,00106%  | 1,09%  |
| 0,000%    | 0,000% |
| 0,000%    | 0,000% |
| 0,000530% | 3,39%  |
| 0,00265%  | 31,5%  |
| 0,00159%  | 3,97%  |



|           |        |
|-----------|--------|
| 0,000%    | 0,000% |
| 0,000%    | 0,000% |
| 0,00955%  | 22,8%  |
| 0,000%    | 0,000% |
| 0,00265%  | 0,000% |
| 0,000%    | 0,000% |
| 0,000%    | 0,000% |
| 0,00159%  | 21,2%  |
| 0,00424%  | 26,1%  |
| 0,000%    | 0,000% |
| 0,00530%  | 44,0%  |
| 0,00212%  | 9,30%  |
| 0,00265%  | 0,000% |
| 0,000530% | 6,95%  |
| 0,000%    | 0,000% |
| 0,000%    | 4,23%  |
| 0,000%    | 0,000% |
| 0,00106%  | 2,46%  |
| 0,00265%  | 18,8%  |
| 0,00106%  | 1,01%  |
| 0,0822%   | 60,1%  |
| 0,00106%  | 7,07%  |
| 0,000%    | 0,000% |
| 0,00106%  | 7,09%  |
| 0,0361%   | 63,4%  |
| 0,0154%   | 54,1%  |
| 0,00265%  | 16,9%  |
| 0,00796%  | 6,02%  |
| 0,00371%  | 0,000% |
| 0,000%    | 0,000% |
| 0,00265%  | 18,3%  |
| 0,000%    | 0,000% |
| 0,000%    | 0,000% |
| 0,00106%  | 31,6%  |
| 0,000%    | 0,000% |
| 0,000%    | 0,000% |
| 0,000%    | 0,000% |
| 0,000%    | 0,000% |
| 0,00318%  | 17,6%  |
| 0,00530%  | 12,9%  |
| 0,00106%  | 9,89%  |
| 0,00106%  | 3,23%  |
| 0,000%    | 0,000% |
| 0,00212%  | 12,9%  |
| 0,000%    | 0,000% |
| 0,000530% | 2,71%  |
| 0,00318%  | 1,83%  |
| 0,000%    | 0,000% |
| 0,00106%  | 12,8%  |
| 0,000%    | 0,000% |
| 0,00106%  | 2,42%  |

|           |        |
|-----------|--------|
| 0,00212%  | 20,1%  |
| 0,000%    | 0,000% |
| 0,00212%  | 3,83%  |
| 0,0557%   | 64,0%  |
| 0,00318%  | 5,84%  |
| 0,00690%  | 27,2%  |
| 0,000%    | 0,000% |
| 0,000%    | 0,000% |
| 0,0180%   | 54,1%  |
| 0,000%    | 0,000% |
| 0,0276%   | 50,2%  |
| 0,000%    | 0,000% |
| 0,00106%  | 6,86%  |
| 0,000%    | 0,000% |
| 0,000%    | 0,000% |
| 0,00106%  | 6,08%  |
| 0,00265%  | 3,60%  |
| 0,00318%  | 19,9%  |
| 0,000%    | 0,000% |
| 0,000%    | 0,000% |
| 0,528%    | 80,7%  |
| 0,00743%  | 29,0%  |
| 0,000%    | 0,000% |
| 0,00265%  | 10,9%  |
| 0,000530% | 1,78%  |
| 0,00159%  | 8,51%  |
| 0,00424%  | 9,51%  |
| 0,000%    | 0,000% |
| 0,000%    | 0,000% |
| 0,00106%  | 10,4%  |
| 0,00159%  | 5,56%  |
| 0,00212%  | 12,9%  |
| 0,000%    | 0,000% |
| 0,00265%  | 9,53%  |
| 0,000%    | 0,000% |
| 0,00796%  | 15,0%  |
| 0,000%    | 0,000% |
| 0,00371%  | 6,85%  |
| 0,000530% | 1,01%  |
| 0,00318%  | 25,5%  |
| 0,000%    | 0,000% |
| 0,000%    | 0,000% |
| 0,00477%  | 10,9%  |
| 0,00318%  | 23,2%  |
| 0,00212%  | 2,20%  |
| 0,000%    | 0,000% |
| 0,0286%   | 33,9%  |
| 0,000%    | 0,000% |
| 0,000%    | 0,000% |
| 0,00584%  | 23,6%  |
| 0,0143%   | 16,5%  |

|           |        |
|-----------|--------|
| 0,00424%  | 18,7%  |
| 0,000%    | 0,000% |
| 0,00530%  | 46,7%  |
| 0,00637%  | 0,000% |
| 0,00371%  | 3,89%  |
| 0,000%    | 0,000% |
| 0,000%    | 0,000% |
| 0,0233%   | 45,7%  |
| 0,000%    | 0,000% |
| 0,000%    | 0,000% |
| 0,000%    | 0,000% |
| 0,179%    | 47,7%  |
| 0,000%    | 0,000% |
| 0,000%    | 0,000% |
| 0,00106%  | 0,637% |
| 0,00849%  | 33,5%  |
| 0,000530% | 14,0%  |
| 0,000%    | 0,000% |
| 0,00106%  | 56,6%  |
| 0,00371%  | 0,000% |
| 0,00106%  | 15,2%  |
| 0,00159%  | 11,3%  |
| 0,000%    | 0,000% |
| 0,000%    | 0,000% |
| 0,000530% | 5,56%  |
| 0,000530% | 6,67%  |
| 0,00477%  | 3,73%  |
| 0,000530% | 2,08%  |
| 0,000%    | 0,000% |
| 0,00637%  | 46,6%  |
| 0,00106%  | 9,73%  |
| 0,000530% | 1,96%  |
| 0,000%    | 0,000% |
| 0,00743%  | 15,5%  |
| 0,000530% | 0,985% |
| 0,00318%  | 13,0%  |
| 0,00477%  | 37,7%  |
| 0,00212%  | 19,5%  |
| 0,000%    | 7,09%  |
| 0,0138%   | 32,1%  |
| 0,0154%   | 41,5%  |
| 0,000%    | 0,000% |
| 0,00212%  | 20,9%  |
| 0,000%    | 0,000% |
| 0,000%    | 0,000% |
| 0,000%    | 0,000% |
| 0,00477%  | 16,6%  |
| 0,000%    | 0,000% |
| 0,00902%  | 0,846% |
| 0,0584%   | 27,1%  |
| 0,00106%  | 16,7%  |

|           |        |
|-----------|--------|
| 0,00106%  | 0,000% |
| 0,0143%   | 18,1%  |
| 0,0313%   | 52,1%  |
| 0,0228%   | 12,1%  |
| 0,00159%  | 6,36%  |
| 0,000%    | 0,000% |
| 0,000%    | 0,000% |
| 0,000%    | 0,000% |
| 0,00159%  | 0,000% |
| 0,00318%  | 10,4%  |
| 0,000%    | 0,000% |
| 0,00265%  | 3,80%  |
| 0,000%    | 0,000% |
| 0,00212%  | 3,70%  |
| 0,00318%  | 57,2%  |
| 0,000%    | 0,000% |
| 0,000530% | 7,37%  |
| 0,000%    | 0,000% |
| 0,00212%  | 13,0%  |
| 0,000%    | 0,000% |
| 0,00106%  | 3,68%  |
| 0,0127%   | 26,1%  |
| 0,000530% | 0,733% |
| 0,000%    | 0,000% |
| 0,0122%   | 2,56%  |
| 0,00265%  | 17,5%  |
| 0,000%    | 0,000% |
| 0,00212%  | 20,6%  |
| 0,00106%  | 4,61%  |
| 0,000%    | 0,000% |
| 0,000530% | 1,95%  |
| 0,00637%  | 6,12%  |
| 0,00371%  | 32,5%  |
| 0,000%    | 0,000% |
| 0,000%    | 0,000% |
| 0,000%    | 0,000% |
| 0,000%    | 0,000% |
| 0,0170%   | 4,93%  |
| 0,00477%  | 38,9%  |
| 0,00371%  | 42,6%  |
| 0,00477%  | 37,0%  |
| 0,00159%  | 4,86%  |
| 0,0260%   | 44,5%  |
| 0,000530% | 1,51%  |
| 0,000530% | 0,727% |
| 0,000%    | 0,000% |
| 0,00212%  | 21,0%  |
| 0,000%    | 0,000% |
| 0,00212%  | 12,6%  |
| 0,00212%  | 15,6%  |
| 0,0111%   | 31,0%  |

|           |        |
|-----------|--------|
| 0,00106%  | 8,35%  |
| 0,000%    | 0,000% |
| 0,000%    | 0,000% |
| 0,000%    | 0,000% |
| 0,000%    | 0,000% |
| 0,000%    | 0,000% |
| 0,000%    | 0,000% |
| 0,000%    | 0,000% |
| 0,000530% | 4,04%  |
| 0,000%    | 0,000% |
| 0,00212%  | 0,000% |
| 0,0366%   | 10,6%  |
| 0,000%    | 0,000% |
| 0,000%    | 0,000% |
| 0,0255%   | 32,4%  |
| 0,000%    | 0,000% |
| 0,000530% | 10,8%  |
| 0,00265%  | 20,6%  |
| 0,000%    | 0,000% |
| 0,000%    | 0,000% |
| 0,000%    | 0,000% |
| 0,00318%  | 42,0%  |
| 0,000%    | 0,000% |
| 0,000%    | 0,000% |
| 0,00106%  | 21,5%  |
| 0,000%    | 0,000% |
| 0,000%    | 0,000% |
| 0,0175%   | 44,0%  |
| 0,00159%  | 19,8%  |
| 0,0472%   | 50,1%  |
| 0,00106%  | 1,70%  |
| 0,00265%  | 0,812% |
| 0,000%    | 0,000% |
| 0,000%    | 0,000% |
| 0,000530% | 0,000% |
| 0,000%    | 0,000% |
| 0,0265%   | 12,3%  |
| 0,00106%  | 4,33%  |
| 0,000%    | 0,000% |
| 0,000%    | 0,000% |
| 0,00637%  | 32,3%  |
| 0,0106%   | 20,9%  |
| 0,00106%  | 3,59%  |
| 0,00318%  | 23,8%  |
| 0,00106%  | 8,52%  |
| 0,0244%   | 36,1%  |
| 0,00424%  | 10,1%  |
| 0,00690%  | 13,8%  |
| 0,00265%  | 4,13%  |
| 0,000%    | 0,000% |
| 0,000%    | 0,000% |

|           |        |
|-----------|--------|
| 0,241%    | 61,4%  |
| 0,0653%   | 38,4%  |
| 0,000%    | 0,000% |
| 0,000%    | 0,000% |
| 0,000%    | 0,000% |
| 0,00106%  | 0,000% |
| 0,00796%  | 26,1%  |
| 0,00159%  | 12,6%  |
| 0,00106%  | 3,72%  |
| 0,00212%  | 21,6%  |
| 0,00106%  | 5,67%  |
| 0,000%    | 0,000% |
| 0,000%    | 0,000% |
| 0,000530% | 1,70%  |
| 0,00159%  | 68,4%  |
| 0,0971%   | 31,2%  |
| 0,000%    | 0,000% |
| 0,000%    | 0,000% |
| 0,000530% | 2,95%  |
| 0,000%    | 0,000% |
| 0,00212%  | 13,3%  |
| 0,00159%  | 10,5%  |
| 0,000%    | 0,000% |
| 0,000%    | 0,000% |
| 0,00265%  | 11,9%  |
| 0,00106%  | 2,37%  |
| 0,00637%  | 26,6%  |
| 0,00106%  | 0,000% |
| 0,0308%   | 0,000% |
| 0,000530% | 8,70%  |
| 0,000530% | 1,97%  |
| 0,00690%  | 30,4%  |
| 0,000%    | 0,000% |
| 0,00159%  | 11,5%  |
| 0,000530% | 1,98%  |
| 0,00106%  | 10,1%  |
| 0,000%    | 0,000% |
| 0,000530% | 1,55%  |
| 0,000%    | 0,000% |
| 0,00106%  | 6,26%  |
| 0,000%    | 0,000% |
| 0,00212%  | 11,4%  |
| 0,000%    | 0,000% |
| 0,00159%  | 8,09%  |
| 0,0647%   | 9,76%  |
| 0,000%    | 0,000% |
| 0,00265%  | 6,97%  |
| 0,000%    | 3,55%  |
| 0,00106%  | 0,000% |
| 0,00477%  | 30,5%  |
| 0,00955%  | 65,7%  |

|           |        |
|-----------|--------|
| 0,00265%  | 19,0%  |
| 0,000%    | 0,000% |
| 0,000%    | 0,000% |
| 0,00796%  | 17,3%  |
| 0,00318%  | 4,58%  |
| 0,00159%  | 8,78%  |
| 0,000%    | 0,000% |
| 0,00159%  | 0,000% |
| 0,000%    | 0,000% |
| 0,0133%   | 41,4%  |
| 0,00477%  | 17,4%  |
| 0,00796%  | 56,3%  |
| 0,000%    | 0,000% |
| 0,00212%  | 11,8%  |
| 0,0122%   | 48,6%  |
| 0,00584%  | 7,70%  |
| 0,00637%  | 0,000% |
| 0,000%    | 0,000% |
| 0,000%    | 0,000% |
| 0,000%    | 0,000% |
| 0,000%    | 0,000% |
| 0,00159%  | 4,20%  |
| 0,0493%   | 0,000% |
| 0,000%    | 0,000% |
| 0,00477%  | 4,52%  |
| 0,000%    | 0,000% |
| 0,00106%  | 0,000% |
| 0,00106%  | 7,73%  |
| 0,000%    | 0,000% |
| 0,000%    | 0,000% |
| 0,000530% | 0,000% |
| 0,00796%  | 23,1%  |
| 0,000%    | 0,000% |
| 0,000%    | 0,000% |
| 0,000%    | 0,000% |
| 0,00318%  | 4,85%  |
| 0,00318%  | 33,6%  |
| 0,000530% | 0,592% |
| 0,000530% | 6,10%  |
| 0,00212%  | 35,7%  |
| 0,0106%   | 15,9%  |
| 0,000%    | 0,000% |
| 0,000530% | 3,68%  |
| 0,00159%  | 9,89%  |
| 0,000%    | 0,000% |
| 0,0218%   | 70,5%  |
| 0,000%    | 0,000% |
| 0,000530% | 2,46%  |
| 0,00159%  | 2,69%  |
| 0,00106%  | 11,3%  |
| 0,00159%  | 33,9%  |

|           |        |
|-----------|--------|
| 0,00159%  | 14,8%  |
| 0,0117%   | 6,18%  |
| 0,000%    | 0,000% |
| 0,000530% | 2,29%  |
| 0,000%    | 0,000% |
| 0,105%    | 44,2%  |
| 0,00637%  | 13,8%  |
| 0,0271%   | 70,1%  |
| 0,00106%  | 0,614% |
| 0,000%    | 0,000% |
| 0,000530% | 2,74%  |
| 0,0196%   | 10,8%  |
| 0,000%    | 0,000% |
| 0,00106%  | 1,36%  |
| 0,00106%  | 5,96%  |
| 0,00159%  | 11,0%  |
| 0,00371%  | 13,8%  |
| 0,127%    | 65,9%  |
| 0,00477%  | 37,8%  |
| 0,00265%  | 28,6%  |
| 0,00106%  | 8,61%  |
| 0,000530% | 7,80%  |
| 0,000%    | 0,000% |
| 0,00212%  | 86,7%  |
| 0,00212%  | 27,1%  |
| 0,000530% | 0,765% |
| 0,000%    | 9,22%  |
| 0,000%    | 0,000% |
| 0,000%    | 0,000% |
| 0,000%    | 4,25%  |
| 0,000%    | 0,000% |
| 0,000%    | 0,000% |
| 0,00611%  | 7,65%  |
| 0,000%    | 0,000% |
| 0,00917%  | 8,91%  |
| 0,00611%  | 3,40%  |
| 0,00611%  | 0,000% |
| 0,000%    | 0,000% |
| 0,00611%  | 4,26%  |
| 0,00306%  | 6,31%  |
| 0,00611%  | 0,000% |
| 0,00306%  | 2,43%  |
| 0,0122%   | 53,9%  |
| 0,00611%  | 3,06%  |
| 0,00306%  | 7,24%  |
| 0,00306%  | 2,09%  |
| 0,00611%  | 0,000% |
| 0,00611%  | 4,88%  |
| 0,000%    | 0,000% |
| 0,000%    | 0,000% |
| 0,00917%  | 5,73%  |



|          |        |
|----------|--------|
| 0,00306% | 5,51%  |
| 0,00306% | 2,33%  |
| 0,000%   | 0,000% |
| 0,00917% | 6,90%  |
| 0,000%   | 0,000% |
| 0,00917% | 1,83%  |
| 0,000%   | 0,000% |
| 0,00917% | 25,8%  |
| 0,00611% | 0,812% |
| 0,00611% | 10,4%  |
| 0,00611% | 5,58%  |
| 0,00611% | 1,51%  |
| 0,00611% | 14,0%  |
| 0,0275%  | 27,6%  |
| 0,00611% | 4,73%  |
| 0,0153%  | 16,2%  |
| 0,0795%  | 17,7%  |
| 0,000%   | 0,000% |
| 0,00917% | 1,48%  |
| 0,177%   | 60,1%  |
| 0,00917% | 9,16%  |
| 0,0122%  | 11,3%  |
| 0,0122%  | 23,3%  |
| 0,00306% | 10,6%  |
| 0,0245%  | 50,7%  |
| 0,00611% | 9,80%  |
| 0,410%   | 34,3%  |
| 0,00306% | 1,13%  |
| 0,000%   | 0,000% |
| 0,000%   | 0,000% |
| 0,000%   | 0,000% |
| 0,00306% | 2,48%  |
| 0,00306% | 7,89%  |
| 0,0153%  | 8,09%  |
| 0,000%   | 0,000% |
| 0,00917% | 8,08%  |
| 0,00306% | 1,96%  |
| 0,00917% | 8,68%  |
| 0,0306%  | 30,4%  |
| 0,00611% | 14,1%  |
| 0,00306% | 10,5%  |
| 0,0275%  | 6,51%  |
| 0,000%   | 1,78%  |
| 0,000%   | 0,000% |
| 0,0673%  | 60,5%  |
| 0,0428%  | 9,36%  |
| 0,00306% | 5,53%  |
| 0,000%   | 0,000% |
| 0,00611% | 0,000% |
| 0,00917% | 19,6%  |
| 0,0734%  | 37,2%  |

|          |        |
|----------|--------|
| 0,0336%  | 17,2%  |
| 0,000%   | 0,000% |
| 0,0122%  | 23,8%  |
| 0,0153%  | 10,2%  |
| 0,0183%  | 49,6%  |
| 0,0275%  | 33,0%  |
| 0,0520%  | 2,54%  |
| 0,000%   | 0,000% |
| 0,0367%  | 19,6%  |
| 0,00306% | 2,07%  |
| 0,000%   | 0,000% |
| 0,00917% | 2,41%  |
| 0,104%   | 45,3%  |
| 0,00917% | 32,9%  |
| 0,0397%  | 26,7%  |
| 0,0122%  | 19,3%  |
| 0,0183%  | 23,4%  |
| 0,00611% | 8,85%  |
| 0,00917% | 0,000% |
| 0,0153%  | 11,7%  |
| 0,000%   | 0,000% |
| 0,0153%  | 22,9%  |
| 0,0948%  | 0,000% |
| 0,113%   | 14,4%  |
| 0,00306% | 5,51%  |
| 0,00917% | 21,5%  |
| 0,00306% | 6,43%  |
| 0,00306% | 1,09%  |
| 0,000%   | 8,12%  |
| 0,0183%  | 0,000% |
| 0,00306% | 14,4%  |
| 0,000%   | 0,000% |
| 0,0122%  | 15,8%  |
| 0,00611% | 14,4%  |
| 0,0367%  | 29,5%  |
| 0,0122%  | 7,38%  |
| 0,00611% | 0,000% |
| 0,0153%  | 5,35%  |
| 0,0642%  | 36,1%  |
| 0,0428%  | 16,4%  |
| 0,0122%  | 25,3%  |
| 0,0459%  | 12,2%  |
| 0,00917% | 10,1%  |
| 0,00306% | 0,733% |
| 0,000%   | 0,000% |
| 0,0183%  | 10,3%  |
| 0,00306% | 5,25%  |
| 0,0122%  | 2,74%  |
| 1,39%    | 77,7%  |
| 0,0153%  | 0,000% |
| 0,0367%  | 51,7%  |

|          |        |
|----------|--------|
| 0,0183%  | 22,5%  |
| 0,0183%  | 3,62%  |
| 0,0367%  | 19,9%  |
| 0,000%   | 0,404% |
| 0,00917% | 7,42%  |
| 0,000%   | 0,000% |
| 0,00306% | 1,62%  |
| 0,00611% | 27,6%  |
| 0,0122%  | 10,7%  |
| 0,810%   | 56,3%  |
| 0,0122%  | 6,33%  |
| 0,0336%  | 11,1%  |
| 0,0795%  | 12,2%  |
| 0,00611% | 7,23%  |
| 0,0887%  | 46,6%  |
| 0,0306%  | 42,1%  |
| 0,00306% | 4,62%  |
| 0,00611% | 19,4%  |
| 0,000%   | 0,000% |
| 0,327%   | 59,3%  |
| 0,00306% | 77,0%  |
| 0,0214%  | 8,13%  |
| 0,0183%  | 10,9%  |
| 0,0397%  | 60,8%  |
| 0,0122%  | 12,8%  |
| 0,000%   | 0,000% |
| 0,0306%  | 7,82%  |
| 0,00306% | 7,83%  |
| 0,0489%  | 59,9%  |
| 0,000%   | 0,000% |
| 0,00611% | 0,000% |
| 0,0153%  | 12,8%  |
| 0,0153%  | 13,0%  |
| 0,00306% | 6,95%  |
| 0,00306% | 4,81%  |
| 0,00306% | 11,1%  |
| 0,128%   | 57,5%  |
| 0,00917% | 9,73%  |
| 0,000%   | 0,000% |
| 0,000%   | 0,000% |
| 0,0275%  | 14,1%  |
| 0,000%   | 0,000% |
| 0,000%   | 5,97%  |
| 0,0367%  | 35,7%  |
| 0,0245%  | 0,000% |
| 0,0245%  | 7,96%  |
| 0,00611% | 9,41%  |
| 0,0825%  | 21,2%  |
| 0,00917% | 9,95%  |
| 0,00306% | 3,28%  |
| 0,0183%  | 11,1%  |

|          |        |
|----------|--------|
| 0,00917% | 20,4%  |
| 0,00306% | 5,51%  |
| 0,00611% | 0,000% |
| 0,0581%  | 24,1%  |
| 0,0306%  | 15,6%  |
| 0,00306% | 0,610% |
| 0,000%   | 0,000% |
| 0,0245%  | 37,9%  |
| 0,00917% | 0,951% |
| 0,0306%  | 11,5%  |
| 0,000%   | 0,846% |
| 0,0734%  | 0,000% |
| 0,000%   | 0,000% |
| 0,00611% | 20,4%  |
| 0,107%   | 48,5%  |
| 0,0917%  | 16,5%  |
| 0,00306% | 8,70%  |
| 0,00917% | 7,12%  |
| 0,00306% | 6,48%  |
| 0,00611% | 0,000% |
| 0,00917% | 19,0%  |
| 0,00611% | 18,8%  |
| 0,202%   | 32,5%  |
| 0,0153%  | 86,4%  |
| 0,00917% | 2,21%  |
| 0,00611% | 12,0%  |
| 0,00917% | 10,4%  |
| 0,00917% | 4,55%  |
| 0,0336%  | 34,0%  |
| 0,000%   | 0,000% |
| 0,000%   | 0,000% |
| 0,000%   | 0,000% |
| 0,0795%  | 0,000% |
| 0,00917% | 31,6%  |
| 0,0367%  | 0,000% |
| 0,00306% | 6,80%  |
| 0,00611% | 3,64%  |
| 0,150%   | 22,4%  |
| 0,000%   | 0,000% |
| 0,0122%  | 4,08%  |
| 0,00611% | 6,40%  |
| 0,00611% | 3,47%  |
| 0,00306% | 2,02%  |
| 0,00306% | 0,000% |
| 0,000%   | 0,000% |
| 0,495%   | 45,7%  |
| 0,00611% | 0,000% |
| 0,0489%  | 22,3%  |
| 0,00306% | 13,0%  |
| 0,104%   | 28,5%  |
| 0,144%   | 20,5%  |

|          |        |
|----------|--------|
| 1,06%    | 82,1%  |
| 0,00306% | 5,67%  |
| 0,000%   | 0,000% |
| 0,00611% | 25,6%  |
| 0,00611% | 8,39%  |
| 0,00306% | 1,57%  |
| 0,00306% | 3,00%  |
| 0,00306% | 5,71%  |
| 0,107%   | 47,7%  |
| 0,00306% | 3,33%  |
| 0,00917% | 9,59%  |
| 0,00306% | 2,01%  |
| 0,0122%  | 30,9%  |
| 0,000%   | 0,000% |
| 0,000%   | 0,000% |
| 0,00917% | 1,95%  |
| 0,0153%  | 10,4%  |
| 0,00306% | 3,36%  |
| 0,0183%  | 28,0%  |
| 0,0978%  | 9,12%  |
| 0,0183%  | 9,17%  |
| 0,00306% | 6,57%  |
| 0,00917% | 0,000% |
| 0,0795%  | 23,4%  |
| 0,00611% | 1,49%  |
| 0,00611% | 0,000% |
| 0,0214%  | 11,8%  |
| 0,000%   | 0,000% |
| 0,0306%  | 3,48%  |
| 0,0214%  | 28,5%  |
| 0,00306% | 2,25%  |
| 0,000%   | 2,11%  |
| 0,0489%  | 27,0%  |
| 0,0275%  | 14,6%  |
| 0,00306% | 4,08%  |
| 0,0336%  | 9,97%  |
| 0,0122%  | 10,6%  |
| 0,00917% | 0,000% |
| 0,0275%  | 22,6%  |
| 0,00306% | 1,06%  |
| 0,00306% | 3,59%  |
| 0,000%   | 0,000% |
| 0,0764%  | 49,8%  |
| 0,00917% | 11,8%  |
| 0,0153%  | 3,45%  |
| 0,00306% | 6,24%  |
| 0,00611% | 21,4%  |
| 0,00917% | 25,3%  |
| 0,0428%  | 38,5%  |
| 0,0122%  | 0,000% |
| 0,0214%  | 30,7%  |

|          |        |
|----------|--------|
| 0,370%   | 40,4%  |
| 0,116%   | 58,1%  |
| 0,00611% | 9,43%  |
| 0,0245%  | 6,47%  |
| 0,00611% | 2,05%  |
| 0,0489%  | 9,78%  |
| 0,00611% | 20,5%  |
| 0,0122%  | 4,76%  |
| 0,00611% | 19,2%  |
| 0,00306% | 2,90%  |
| 0,00550% | 4,98%  |
| 0,00367% | 0,000% |
| 0,0642%  | 54,0%  |
| 0,0220%  | 7,46%  |
| 0,00734% | 8,80%  |
| 0,00550% | 17,8%  |
| 0,0239%  | 15,2%  |
| 0,00550% | 51,6%  |
| 0,00367% | 1,06%  |
| 0,0550%  | 51,6%  |
| 0,00367% | 6,57%  |
| 0,0367%  | 54,0%  |
| 0,0789%  | 63,5%  |
| 0,00367% | 0,000% |
| 0,0110%  | 21,6%  |
| 0,00734% | 13,6%  |
| 0,00550% | 6,28%  |
| 0,00183% | 0,675% |
| 0,0110%  | 24,2%  |
| 0,0147%  | 15,2%  |
| 0,00550% | 18,1%  |
| 0,0128%  | 4,95%  |
| 0,0459%  | 45,3%  |
| 0,0459%  | 35,7%  |
| 0,134%   | 59,6%  |
| 0,000%   | 2,21%  |
| 0,00550% | 9,06%  |
| 0,00917% | 8,39%  |
| 0,00367% | 9,31%  |
| 0,117%   | 43,0%  |
| 0,0110%  | 11,2%  |
| 0,000%   | 2,31%  |
| 0,00550% | 4,27%  |
| 0,00734% | 10,8%  |
| 0,130%   | 32,1%  |
| 0,0202%  | 25,6%  |
| 0,0183%  | 25,7%  |
| 0,00550% | 29,8%  |
| 0,00367% | 15,6%  |
| 0,158%   | 43,3%  |
| 0,0569%  | 6,65%  |

|          |        |
|----------|--------|
| 0,00550% | 1,43%  |
| 0,0239%  | 16,7%  |
| 0,0495%  | 36,2%  |
| 0,0165%  | 26,0%  |
| 0,00367% | 4,27%  |
| 0,0110%  | 11,8%  |
| 0,00550% | 14,0%  |
| 0,0165%  | 0,000% |
| 0,158%   | 49,4%  |
| 0,0440%  | 37,5%  |
| 0,0128%  | 41,9%  |
| 0,0165%  | 33,0%  |
| 0,0128%  | 13,0%  |
| 0,0716%  | 45,4%  |
| 0,0716%  | 62,7%  |
| 0,0862%  | 83,4%  |
| 0,00367% | 15,2%  |
| 0,0110%  | 6,10%  |
| 0,00367% | 22,8%  |
| 0,0275%  | 53,1%  |
| 0,00183% | 8,61%  |
| 0,0550%  | 40,3%  |
| 0,174%   | 90,1%  |
| 0,00917% | 32,5%  |
| 0,0917%  | 36,0%  |
| 0,0128%  | 24,9%  |
| 0,00550% | 8,52%  |
| 0,0899%  | 24,3%  |
| 0,00734% | 12,5%  |
| 0,0661%  | 53,9%  |
| 0,0275%  | 62,4%  |
| 0,0459%  | 47,1%  |
| 0,308%   | 64,3%  |
| 0,0128%  | 9,11%  |
| 0,0239%  | 34,0%  |
| 0,00367% | 13,1%  |
| 0,000%   | 0,000% |
| 0,0128%  | 7,75%  |
| 0,00550% | 2,97%  |
| 0,0110%  | 29,0%  |
| 0,0257%  | 73,6%  |
| 0,00367% | 9,78%  |
| 0,0422%  | 16,8%  |
| 0,00734% | 49,5%  |
| 0,00917% | 2,57%  |
| 0,0128%  | 10,2%  |
| 0,00734% | 22,3%  |
| 0,00550% | 11,6%  |
| 0,00550% | 8,51%  |
| 0,0220%  | 20,0%  |
| 0,00367% | 3,99%  |

|          |        |
|----------|--------|
| 0,0110%  | 17,5%  |
| 0,0275%  | 34,0%  |
| 0,00367% | 5,97%  |
| 0,0917%  | 83,9%  |
| 0,0275%  | 14,5%  |
| 0,000%   | 0,000% |
| 0,00367% | 0,000% |
| 0,0110%  | 51,1%  |
| 0,0385%  | 0,000% |
| 0,0165%  | 0,000% |
| 0,0734%  | 32,5%  |
| 0,0202%  | 29,4%  |
| 0,00367% | 0,000% |
| 0,0128%  | 21,7%  |
| 0,00367% | 6,63%  |
| 0,00550% | 10,5%  |
| 0,0385%  | 28,2%  |
| 0,0110%  | 14,3%  |
| 0,00734% | 4,35%  |
| 0,000%   | 0,000% |
| 0,0183%  | 24,9%  |
| 0,0183%  | 12,3%  |
| 0,00734% | 5,26%  |
| 0,00367% | 5,37%  |
| 0,00367% | 12,8%  |
| 0,00734% | 5,51%  |
| 0,0367%  | 75,8%  |
| 0,0440%  | 0,000% |
| 0,0183%  | 18,3%  |
| 0,00917% | 16,5%  |
| 0,0128%  | 5,09%  |
| 0,00183% | 2,46%  |
| 0,0128%  | 43,3%  |
| 0,0110%  | 3,38%  |
| 0,112%   | 0,000% |
| 0,0514%  | 72,6%  |
| 0,0679%  | 43,3%  |
| 0,000%   | 0,000% |
| 0,0110%  | 16,3%  |
| 0,0165%  | 36,5%  |
| 0,0789%  | 39,8%  |
| 0,141%   | 45,6%  |
| 0,00183% | 8,09%  |
| 0,00367% | 6,97%  |
| 0,00367% | 9,31%  |
| 0,0844%  | 63,2%  |
| 0,0110%  | 20,4%  |
| 0,0110%  | 27,4%  |
| 0,00550% | 9,72%  |
| 0,00917% | 16,0%  |
| 0,00917% | 19,7%  |



|          |        |
|----------|--------|
| 0,00917% | 38,4%  |
| 0,0128%  | 5,38%  |
| 0,000%   | 1,86%  |
| 0,0165%  | 0,000% |
| 0,00734% | 15,5%  |
| 0,00734% | 13,9%  |
| 0,0404%  | 13,2%  |
| 0,00183% | 4,62%  |
| 0,00367% | 1,06%  |
| 0,00550% | 31,3%  |
| 0,00917% | 0,000% |
| 0,0128%  | 24,6%  |
| 0,00917% | 34,3%  |
| 0,0349%  | 72,9%  |
| 0,00917% | 16,0%  |
| 0,000%   | 0,000% |
| 0,0165%  | 21,4%  |
| 0,114%   | 63,5%  |
| 0,00550% | 20,5%  |
| 0,0239%  | 37,6%  |
| 0,0165%  | 23,7%  |
| 0,00734% | 5,03%  |
| 0,000%   | 0,000% |
| 0,00550% | 5,83%  |
| 0,00367% | 7,30%  |
| 0,000%   | 0,000% |
| 0,706%   | 76,2%  |
| 0,0165%  | 27,5%  |
| 0,0477%  | 51,2%  |
| 0,00550% | 39,0%  |
| 0,0550%  | 14,8%  |
| 0,0128%  | 17,0%  |
| 0,00550% | 4,92%  |
| 0,0128%  | 39,0%  |
| 0,00367% | 6,99%  |
| 0,0477%  | 58,3%  |
| 0,00734% | 29,9%  |
| 0,0147%  | 15,2%  |
| 0,0183%  | 18,0%  |
| 0,00367% | 63,8%  |
| 0,00367% | 6,94%  |
| 0,0972%  | 64,0%  |
| 0,0128%  | 12,5%  |
| 0,00917% | 10,3%  |
| 0,000%   | 0,000% |
| 0,0183%  | 18,8%  |
| 0,0183%  | 34,1%  |
| 0,0239%  | 28,7%  |
| 0,0367%  | 22,8%  |
| 0,00734% | 0,000% |
| 0,00917% | 14,0%  |

|          |        |
|----------|--------|
| 0,0330%  | 41,0%  |
| 0,0550%  | 74,4%  |
| 0,0110%  | 22,4%  |
| 0,00734% | 26,7%  |
| 0,00550% | 2,49%  |
| 0,00367% | 4,56%  |
| 0,00183% | 2,08%  |
| 0,00183% | 1,42%  |
| 0,0275%  | 0,000% |
| 0,0110%  | 17,5%  |
| 0,0349%  | 20,5%  |
| 0,0514%  | 96,6%  |
| 0,00550% | 7,09%  |
| 0,0183%  | 25,7%  |
| 0,0257%  | 41,0%  |
| 0,000%   | 0,000% |
| 0,0202%  | 30,2%  |
| 0,0385%  | 37,4%  |
| 0,00367% | 6,65%  |
| 0,0477%  | 48,2%  |
| 0,000%   | 0,000% |
| 0,000%   | 0,000% |
| 0,000%   | 0,000% |
| 0,00367% | 2,08%  |
| 0,00734% | 5,76%  |
| 0,0147%  | 11,1%  |
| 0,00367% | 11,0%  |
| 0,0147%  | 20,6%  |
| 0,0679%  | 32,2%  |
| 0,00734% | 11,0%  |
| 0,0128%  | 0,000% |
| 0,0275%  | 29,0%  |
| 0,00734% | 10,0%  |
| 0,0257%  | 43,4%  |
| 0,000%   | 0,000% |
| 0,00550% | 8,68%  |
| 0,00550% | 6,41%  |
| 0,00183% | 1,97%  |
| 0,0220%  | 18,5%  |
| 0,00367% | 47,1%  |
| 0,0110%  | 19,7%  |
| 0,0183%  | 20,1%  |
| 0,00917% | 16,4%  |
| 0,0257%  | 39,9%  |
| 0,00550% | 7,74%  |
| 0,0183%  | 45,7%  |
| 0,00550% | 6,32%  |
| 0,00183% | 15,3%  |
| 0,00550% | 12,0%  |
| 0,0147%  | 40,7%  |
| 0,0404%  | 23,7%  |

|          |        |
|----------|--------|
| 0,0147%  | 35,7%  |
| 0,00183% | 1,84%  |
| 0,00917% | 14,5%  |
| 0,0514%  | 48,2%  |
| 0,00367% | 1,69%  |
| 0,0165%  | 11,9%  |
| 0,00550% | 2,04%  |
| 0,00550% | 8,64%  |
| 0,0294%  | 35,9%  |
| 0,0605%  | 18,6%  |
| 0,00367% | 5,83%  |
| 0,0183%  | 24,6%  |
| 0,0422%  | 23,0%  |
| 0,00183% | 7,17%  |
| 0,0972%  | 17,4%  |
| 0,000%   | 0,000% |
| 0,00550% | 19,7%  |
| 0,000%   | 0,000% |
| 0,0294%  | 8,24%  |
| 0,0165%  | 0,000% |
| 0,00917% | 7,66%  |
| 0,0550%  | 58,6%  |
| 0,0789%  | 0,000% |
| 0,0183%  | 4,79%  |
| 0,0110%  | 35,7%  |
| 0,0239%  | 11,6%  |
| 0,00734% | 34,7%  |
| 0,000%   | 0,000% |
| 0,0128%  | 10,8%  |
| 0,0495%  | 26,0%  |
| 0,0239%  | 18,8%  |
| 0,00367% | 32,1%  |
| 0,00367% | 27,3%  |
| 0,0165%  | 30,2%  |
| 0,00367% | 8,66%  |
| 0,00367% | 8,72%  |
| 0,00367% | 0,000% |
| 0,0110%  | 16,4%  |
| 0,00183% | 12,8%  |
| 0,268%   | 96,6%  |
| 0,00367% | 27,6%  |
| 0,00734% | 3,02%  |
| 0,00734% | 11,0%  |
| 0,000%   | 0,000% |
| 0,00367% | 6,83%  |
| 0,00917% | 8,78%  |
| 0,0275%  | 21,9%  |
| 0,0605%  | 28,2%  |
| 0,0128%  | 51,3%  |
| 0,00734% | 20,4%  |
| 0,0330%  | 55,1%  |

|          |        |
|----------|--------|
| 0,00550% | 29,6%  |
| 0,00550% | 13,9%  |
| 0,0716%  | 55,2%  |
| 0,00367% | 8,82%  |
| 0,00917% | 30,1%  |
| 0,0128%  | 31,3%  |
| 0,0147%  | 28,6%  |
| 0,0110%  | 3,37%  |
| 0,00550% | 21,8%  |
| 0,0220%  | 76,9%  |
| 0,00734% | 4,01%  |
| 0,0110%  | 14,8%  |
| 0,00734% | 6,74%  |
| 0,0367%  | 31,7%  |
| 0,00734% | 49,4%  |
| 0,00917% | 16,0%  |
| 0,0128%  | 39,2%  |
| 0,00734% | 15,7%  |
| 0,0294%  | 35,0%  |
| 0,0147%  | 7,48%  |
| 0,000%   | 0,000% |
| 0,00734% | 23,3%  |
| 0,0183%  | 65,0%  |
| 0,00734% | 39,4%  |
| 0,00550% | 19,4%  |
| 0,0128%  | 10,7%  |
| 0,00550% | 5,78%  |
| 0,0147%  | 24,3%  |
| 0,00917% | 23,2%  |
| 0,000%   | 0,000% |
| 0,00367% | 9,22%  |
| 0,00734% | 14,7%  |
| 0,00917% | 11,7%  |
| 0,00550% | 15,8%  |
| 0,00550% | 4,44%  |
| 0,00367% | 2,49%  |
| 0,0514%  | 34,3%  |
| 0,000%   | 0,000% |
| 0,00367% | 1,71%  |
| 0,00367% | 15,1%  |
| 0,0954%  | 71,7%  |
| 0,00550% | 10,9%  |
| 0,0404%  | 73,0%  |
| 0,0128%  | 18,8%  |
| 0,0954%  | 55,3%  |
| 0,00917% | 33,6%  |
| 0,00367% | 15,9%  |
| 0,0147%  | 24,8%  |
| 0,00917% | 28,6%  |
| 0,0349%  | 54,3%  |
| 0,0165%  | 6,21%  |

|          |        |
|----------|--------|
| 0,178%   | 53,5%  |
| 0,00550% | 18,1%  |
| 0,0183%  | 68,0%  |
| 0,0367%  | 6,88%  |
| 0,00734% | 12,9%  |
| 0,00550% | 3,82%  |
| 0,00550% | 34,8%  |
| 0,00367% | 2,68%  |
| 0,0110%  | 8,13%  |
| 0,0275%  | 25,1%  |
| 0,0257%  | 15,4%  |
| 0,0771%  | 66,0%  |
| 0,00917% | 27,0%  |
| 0,0220%  | 48,7%  |
| 0,0679%  | 29,6%  |
| 0,00367% | 42,1%  |
| 0,00917% | 3,80%  |
| 0,0239%  | 50,8%  |
| 0,00917% | 51,1%  |
| 0,00917% | 12,4%  |
| 0,00550% | 9,46%  |
| 0,0183%  | 16,6%  |
| 0,0128%  | 17,5%  |
| 0,0349%  | 8,62%  |
| 0,00917% | 27,2%  |
| 0,00367% | 27,9%  |
| 0,0220%  | 70,3%  |
| 0,0147%  | 68,4%  |
| 0,00550% | 11,4%  |
| 0,0183%  | 46,5%  |
| 0,0495%  | 81,1%  |
| 0,0587%  | 88,8%  |
| 0,00550% | 17,4%  |
| 0,00550% | 2,17%  |
| 0,00734% | 9,59%  |
| 0,0917%  | 64,3%  |
| 0,0128%  | 18,6%  |
| 0,00734% | 20,5%  |
| 0,0147%  | 30,9%  |
| 0,00734% | 32,5%  |
| 0,0183%  | 44,4%  |
| 0,00367% | 4,42%  |
| 0,0202%  | 19,8%  |
| 0,00367% | 0,000% |
| 0,0605%  | 84,4%  |
| 0,00367% | 13,3%  |
| 0,0110%  | 6,79%  |
| 0,00550% | 62,7%  |
| 0,00550% | 13,0%  |
| 0,00917% | 50,9%  |
| 0,00550% | 10,00% |

|          |       |
|----------|-------|
| 0,0202%  | 26,1% |
| 0,0330%  | 31,1% |
| 0,0257%  | 49,3% |
| 0,0275%  | 14,4% |
| 0,00550% | 3,66% |
| 0,00367% | 7,54% |
| 0,00183% | 7,56% |
| 0,0459%  | 93,2% |
| 0,00367% | 1,59% |
| 0,0128%  | 40,1% |
